# Supplementary material for: MircoRNA in Extracellular Vesicles from Patients with Pulmonary Arterial Hypertension Alters Endothelial Angiogenic Response
Source: MDPI journal article supplement (doi:10.3390/ijms231911964), 2022-10-08
Supplement: s1 [file s1]

# Supplementary Figure S1

A

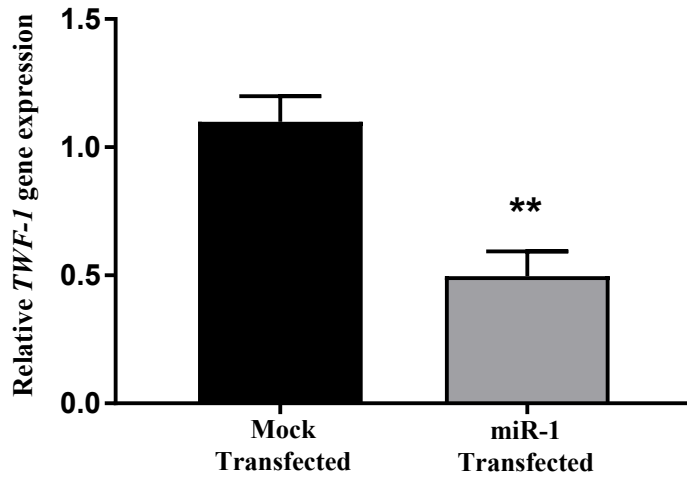

Figure S1: Relative TWF-1 gene expression to housekeeping GAPDH in hPAECs quantified by qRT-PCR. Data is given as mean with SD (n=3 per group). P-value by Student's t-test. \*\* P<0.01.

# Supplementary Figure S2

A

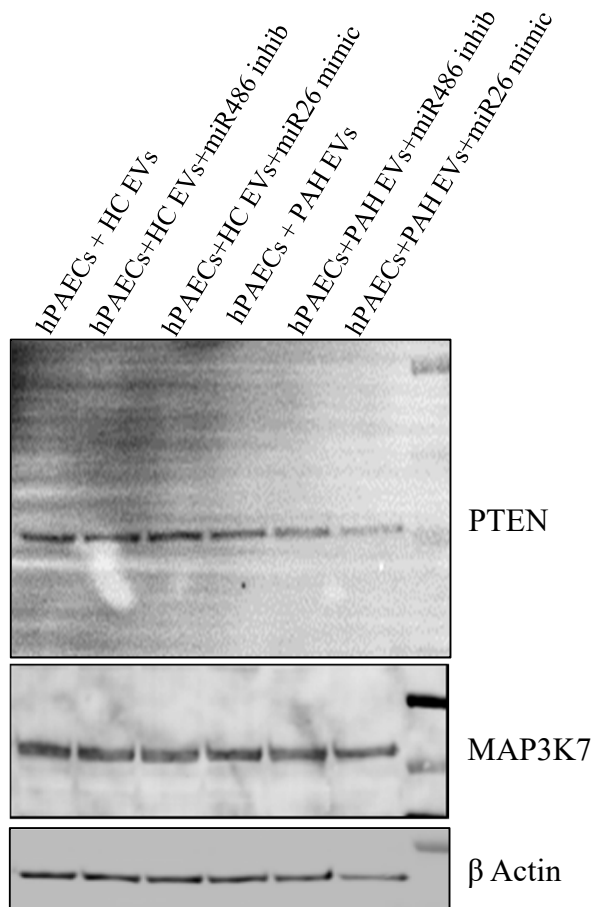

Figure S2: Representative immunoblots of PTEN and MAP3K7 along with housekeeping b-actin loading control in hPAECs preincubated with either HC or PAH EVs followed by transfection of miR inhibitor or mimic. (n=3).
