# Supplementary material for: MircoRNA in Extracellular Vesicles from Patients with Pulmonary Arterial Hypertension Alters Endothelial Angiogenic Response
Source: Int J Mol Sci. 2022 Oct 8;23(19):11964. doi: 10.3390/ijms231911964 (PMC9570422; doi:10.3390/ijms231911964)
Supplement: Supplementary file 1 [file ijms-23-11964-s001.zip › Supplementary Table S1.xlsx]

## Sheet: Sheet1
ID	description	GO-term-size	Observed-Target-Gene-Overlap-Proportio	Mean-Random-Simulated-MicroRNA-Target-Overlap-Proportion	One-sided-empirical-p-value	BH Adjusted p-value
GO:0051726	regulation of cell cycle	159	0.0184887	0.0118469	0.00012	0.535274
GO:0051056	regulation of small GTPase mediated signal transduction	142	0.017283	0.0102939	0.000216	0.535274
GO:0031346	positive regulation of cell projection organization	7	0.00160772	0.00041301	0.000283	0.535274
GO:0030865	cortical cytoskeleton organization	20	0.00321543	0.00108751	0.000428	0.535274
GO:0007266	Rho protein signal transduction	57	0.00723473	0.00380538	0.000465	0.535274
GO:0060306	regulation of membrane repolarization	11	0.00241158	0.00087167	0.000541	0.535274
GO:0045766	positive regulation of angiogenesis	158	0.0144695	0.00930552	0.000839	0.535274
GO:0036155	acylglycerol acyl-chain remodeling	7	0.00120579	0.000150219	0.000954	0.535274
GO:0002040	sprouting angiogenesis	33	0.00482315	0.00234779	0.00106	0.535274
GO:0016573	histone acetylation	51	0.00723473	0.00409047	0.00108	0.535274
GO:0061744	motor behavior	10	0.00200965	0.000720113	0.001383	0.535274
GO:0001957	intramembranous ossification	6	0.00160772	0.000444407	0.001459	0.535274
GO:0030949	positive regulation of vascular endothelial growth factor receptor signaling pathway	18	0.00241158	0.000941227	0.001613	0.535274
GO:0051247	positive regulation of protein metabolic process	10	0.00200965	0.000785564	0.001636	0.535274
GO:0014059	regulation of dopamine secretion	29	0.00361736	0.0015456	0.001961	0.535274
GO:0006555	methionine metabolic process	7	0.00120579	0.000232297	0.002131	0.535274
GO:2000272	negative regulation of signaling receptor activity	38	0.00401929	0.00152203	0.002186	0.535274
GO:0030213	hyaluronan biosynthetic process	7	0.00160772	0.000507126	0.002361	0.535274
GO:0030511	positive regulation of transforming growth factor beta receptor signaling pathway	31	0.00442122	0.00229324	0.002426	0.535274
GO:0070734	histone H3-K27 methylation	6	0.00160772	0.000548187	0.002524	0.535274
GO:0007610	behavior	9	0.00200965	0.000797752	0.002631	0.535274
GO:0098734	macromolecule depalmitoylation	7	0.000803859	0.000107632	0.002666	0.535274
GO:0016197	endosomal transport	90	0.0096463	0.00599226	0.002748	0.535274
GO:0090271	positive regulation of fibroblast growth factor production	5	0.00120579	0.000428969	0.002801	0.535274
GO:0007613	memory	89	0.0120579	0.00813311	0.002882	0.535274
GO:0030111	regulation of Wnt signaling pathway	30	0.00482315	0.00257956	0.002925	0.535274
GO:0032693	negative regulation of interleukin-10 production	24	0.00241158	0.000936409	0.003036	0.535274
GO:0010757	negative regulation of plasminogen activation	6	0.00120579	0.000280599	0.003067	0.535274
GO:0042775	mitochondrial ATP synthesis coupled electron transport	9	0.00120579	0.00024299	0.003086	0.535274
GO:0071502	cellular response to temperature stimulus	5	0.000803859	0.000109016	0.00314	0.535274
GO:0007628	adult walking behavior	32	0.00482315	0.00248497	0.003141	0.535274
GO:0010324	membrane invagination	6	0.00120579	0.000388262	0.003166	0.535274
GO:0035624	receptor transactivation	5	0.00120579	0.000316258	0.003293	0.535274
GO:0060292	long-term synaptic depression	18	0.00321543	0.00150854	0.00331	0.535274
GO:0014883	transition between fast and slow fiber	9	0.00120579	0.000455719	0.003456	0.535274
GO:0006473	protein acetylation	16	0.0028135	0.00144152	0.003616	0.535274
GO:0043065	positive regulation of apoptotic process	386	0.0317524	0.0249574	0.003691	0.535274
GO:0072498	embryonic skeletal joint development	6	0.00120579	0.000255869	0.003694	0.535274
GO:0110095	cellular detoxification of aldehyde	5	0.000803859	0.000107938	0.003698	0.535274
GO:0043378	positive regulation of CD8-positive, alpha-beta T cell differentiation	5	0.00120579	0.00036407	0.003813	0.535274
GO:0043983	histone H4-K12 acetylation	7	0.00200965	0.000800845	0.003891	0.535274
GO:1901017	negative regulation of potassium ion transmembrane transporter activity	8	0.00200965	0.000893232	0.003923	0.535274
GO:0032410	negative regulation of transporter activity	5	0.00160772	0.000599951	0.003944	0.535274
GO:0035590	purinergic nucleotide receptor signaling pathway	8	0.00120579	0.000293171	0.00417	0.535274
GO:0050850	positive regulation of calcium-mediated signaling	17	0.00160772	0.000436504	0.004639	0.535274
GO:0010996	response to auditory stimulus	15	0.00200965	0.000733534	0.00473	0.535274
GO:0046777	protein autophosphorylation	177	0.0180868	0.0131434	0.004792	0.535274
GO:0010469	regulation of signaling receptor activity	16	0.00241158	0.0010677	0.004987	0.535274
GO:2000134	negative regulation of G1/S transition of mitotic cell cycle	63	0.00602894	0.00366671	0.005096	0.535274
GO:0017158	regulation of calcium ion-dependent exocytosis	19	0.0028135	0.00119034	0.00511	0.535274
GO:0044319	wound healing, spreading of cells	15	0.00241158	0.00100071	0.005204	0.535274
GO:0021510	spinal cord development	35	0.00482315	0.00273831	0.005231	0.535274
GO:0006879	cellular iron ion homeostasis	61	0.00562701	0.00319677	0.005385	0.535274
GO:0045639	positive regulation of myeloid cell differentiation	5	0.00120579	0.000398616	0.005518	0.535274
GO:1903672	positive regulation of sprouting angiogenesis	31	0.00361736	0.00186794	0.005714	0.535274
GO:0021540	corpus callosum morphogenesis	6	0.00160772	0.000727521	0.005859	0.535274
GO:0010524	positive regulation of calcium ion transport into cytosol	14	0.00200965	0.000770431	0.005868	0.535274
GO:0006977	DNA damage response, signal transduction by p53 class mediator resulting in cell cycle arrest	58	0.00723473	0.00466486	0.006123	0.535274
GO:0030208	dermatan sulfate biosynthetic process	12	0.00200965	0.000759808	0.006374	0.535274
GO:0070189	kynurenine metabolic process	5	0.000803859	0.00011885	0.006421	0.535274
GO:0071866	negative regulation of apoptotic process in bone marrow cell	5	0.00120579	0.000340069	0.00645	0.535274
GO:0007156	homophilic cell adhesion via plasma membrane adhesion molecules	168	0.0241158	0.0132784	0.006513	0.535274
GO:0042376	phylloquinone catabolic process	5	0.000803859	8.52224e-05	0.006514	0.535274
GO:0051791	medium-chain fatty acid metabolic process	5	0.000803859	0.000194542	0.00663	0.535274
GO:0061737	leukotriene signaling pathway	5	0.000803859	0.000152148	0.006659	0.535274
GO:0045063	T-helper 1 cell differentiation	6	0.00120579	0.000308195	0.006922	0.535274
GO:0061298	retina vasculature development in camera-type eye	8	0.00200965	0.000976477	0.007012	0.535274
GO:0061635	regulation of protein complex stability	11	0.00160772	0.000548257	0.007036	0.535274
GO:0044648	histone H3-K4 dimethylation	6	0.00120579	0.000429775	0.007184	0.535274
GO:0061462	protein localization to lysosome	11	0.00160772	0.000528377	0.007236	0.535274
GO:0030010	establishment of cell polarity	35	0.00482315	0.00270838	0.007332	0.535274
GO:0098664	G protein-coupled serotonin receptor signaling pathway	29	0.00241158	0.00104791	0.007348	0.535274
GO:0008037	cell recognition	9	0.00160772	0.000555146	0.007348	0.535274
GO:0032286	central nervous system myelin maintenance	6	0.00120579	0.000440426	0.007673	0.535274
GO:0010508	positive regulation of autophagy	65	0.00763666	0.00510299	0.007856	0.535274
GO:0036101	leukotriene B4 catabolic process	5	0.000803859	9.76536e-05	0.008009	0.535274
GO:0021764	amygdala development	5	0.00160772	0.000710716	0.008051	0.535274
GO:0001952	regulation of cell-matrix adhesion	14	0.0028135	0.00148931	0.00806	0.535274
GO:0034447	very-low-density lipoprotein particle clearance	6	0.000803859	0.000210374	0.008128	0.535274
GO:0018345	protein palmitoylation	23	0.00361736	0.00197942	0.008223	0.535274
GO:0021670	lateral ventricle development	13	0.0028135	0.00145619	0.008393	0.535274
GO:0031113	regulation of microtubule polymerization	13	0.00241158	0.00124088	0.008404	0.535274
GO:0018230	peptidyl-L-cysteine S-palmitoylation	24	0.00361736	0.00197859	0.008435	0.535274
GO:2000651	positive regulation of sodium ion transmembrane transporter activity	8	0.00200965	0.000985319	0.008447	0.535274
GO:1903215	negative regulation of protein targeting to mitochondrion	6	0.00120579	0.000378341	0.008471	0.535274
GO:1900118	negative regulation of execution phase of apoptosis	17	0.00241158	0.000627096	0.008852	0.535274
GO:1901030	positive regulation of mitochondrial outer membrane permeabilization involved in apoptotic signaling pathway	11	0.00160772	0.000559842	0.008917	0.535274
GO:0048146	positive regulation of fibroblast proliferation	51	0.00562701	0.003451	0.008975	0.535274
GO:0051918	negative regulation of fibrinolysis	10	0.00120579	0.000347784	0.009129	0.535274
GO:0048843	negative regulation of axon extension involved in axon guidance	26	0.00401929	0.00230987	0.009396	0.535274
GO:2000271	positive regulation of fibroblast apoptotic process	10	0.00200965	0.000924182	0.009463	0.535274
GO:0032515	negative regulation of phosphoprotein phosphatase activity	55	0.00643087	0.00404654	0.009541	0.535274
GO:0032714	negative regulation of interleukin-5 production	8	0.00120579	0.000387725	0.009619	0.535274
GO:0035524	proline transmembrane transport	6	0.00120579	0.000357093	0.009862	0.535274
GO:0019674	"NAD metabolic process"	16	0.00200965	0.00080137	0.009992	0.535274
GO:0015886	heme transport	8	0.00120579	0.000411401	0.010007	0.535274
GO:0034644	cellular response to UV	53	0.00602894	0.00388068	0.010078	0.535274
GO:0007270	neuron-neuron synaptic transmission	9	0.00200965	0.000962877	0.010178	0.535274
GO:0048008	platelet-derived growth factor receptor signaling pathway	32	0.00522508	0.00326429	0.010202	0.535274
GO:0052651	monoacylglycerol catabolic process	7	0.000803859	0.000162661	0.010365	0.535274
GO:0009253	peptidoglycan catabolic process	6	0.000401929	3.25296e-05	0.010393	0.535274
GO:0008104	protein localization	89	0.00803859	0.00532454	0.010515	0.535274
GO:2000045	regulation of G1/S transition of mitotic cell cycle	19	0.00241158	0.00110225	0.010529	0.535274
GO:2000545	negative regulation of endothelial cell chemotaxis to fibroblast growth factor	5	0.000401929	3.50161e-05	0.010537	0.535274
GO:0005978	glycogen biosynthetic process	22	0.00241158	0.00106758	0.010894	0.535274
GO:0019369	arachidonic acid metabolic process	37	0.00241158	0.00101736	0.011025	0.535274
GO:0006983	ER overload response	12	0.00200965	0.000943037	0.011039	0.535274
GO:0070242	thymocyte apoptotic process	5	0.00120579	0.000423482	0.011086	0.535274
GO:0007093	mitotic cell cycle checkpoint	31	0.00321543	0.00168673	0.011122	0.535274
GO:0060509	type I pneumocyte differentiation	5	0.00160772	0.000858466	0.011165	0.535274
GO:0044351	macropinocytosis	7	0.00120579	0.00033741	0.011168	0.535274
GO:0033198	response to ATP	20	0.00241158	0.00117515	0.011485	0.535274
GO:0019346	transsulfuration	6	0.000803859	0.000105443	0.011693	0.535274
GO:0016458	gene silencing	8	0.00120579	0.000472444	0.011862	0.535274
GO:0071447	cellular response to hydroperoxide	7	0.00160772	0.000697772	0.011874	0.535274
GO:0045741	positive regulation of epidermal growth factor-activated receptor activity	13	0.00200965	0.00092741	0.012007	0.535274
GO:0007009	plasma membrane organization	25	0.0028135	0.00142991	0.012091	0.535274
GO:0032228	regulation of synaptic transmission, GABAergic	15	0.0028135	0.00156124	0.012156	0.535274
GO:0097692	histone H3-K4 monomethylation	8	0.00160772	0.000724482	0.012672	0.535274
GO:0006730	one-carbon metabolic process	36	0.00361736	0.00188674	0.012688	0.535274
GO:0043697	cell dedifferentiation	5	0.00120579	0.000513371	0.012848	0.535274
GO:0098532	histone H3-K27 trimethylation	7	0.00120579	0.00048538	0.01289	0.535274
GO:0051224	negative regulation of protein transport	6	0.00160772	0.000684881	0.012958	0.535274
GO:0030509	BMP signaling pathway	86	0.0100482	0.00712802	0.013051	0.535274
GO:0021591	ventricular system development	18	0.00241158	0.00127298	0.013057	0.535274
GO:0032414	positive regulation of ion transmembrane transporter activity	8	0.00160772	0.000740191	0.013198	0.535274
GO:0043536	positive regulation of blood vessel endothelial cell migration	49	0.00522508	0.00329062	0.013504	0.535274
GO:0006865	amino acid transport	62	0.00562701	0.00355699	0.014054	0.535274
GO:0023014	signal transduction by protein phosphorylation	19	0.00361736	0.00219208	0.014204	0.535274
GO:0046902	regulation of mitochondrial membrane permeability	10	0.00160772	0.000647996	0.014633	0.535274
GO:0097485	neuron projection guidance	6	0.00120579	0.000452782	0.014689	0.535274
GO:0048702	embryonic neurocranium morphogenesis	8	0.00120579	0.000415484	0.014749	0.535274
GO:0001817	regulation of cytokine production	32	0.00321543	0.00160526	0.014753	0.535274
GO:0007185	transmembrane receptor protein tyrosine phosphatase signaling pathway	6	0.00160772	0.000791939	0.014945	0.535274
GO:0031643	positive regulation of myelination	18	0.0028135	0.00149843	0.015006	0.535274
GO:0033599	regulation of mammary gland epithelial cell proliferation	5	0.000803859	0.000237721	0.015198	0.535274
GO:0036302	atrioventricular canal development	7	0.00160772	0.000788939	0.015244	0.535274
GO:2001028	positive regulation of endothelial cell chemotaxis	10	0.00160772	0.000677877	0.015272	0.535274
GO:0090630	activation of GTPase activity	111	0.0096463	0.00663036	0.015331	0.535274
GO:0009994	oocyte differentiation	5	0.000803859	0.000208072	0.015428	0.535274
GO:0021766	hippocampus development	70	0.00844051	0.00587699	0.015792	0.535274
GO:0097052	L-kynurenine metabolic process	6	0.000803859	0.000174479	0.016059	0.535274
GO:0043122	regulation of I-kappaB kinase/NF-kappaB signaling	31	0.0028135	0.00150584	0.016064	0.535274
GO:0015808	L-alanine transport	7	0.00120579	0.000432804	0.016064	0.535274
GO:0007409	axonogenesis	99	0.0120579	0.00898069	0.01617	0.535274
GO:0035308	negative regulation of protein dephosphorylation	13	0.00200965	0.000992402	0.016409	0.535274
GO:0045821	positive regulation of glycolytic process	25	0.00401929	0.00254375	0.016503	0.535274
GO:0035023	regulation of Rho protein signal transduction	29	0.00361736	0.00199137	0.016653	0.535274
GO:0045956	positive regulation of calcium ion-dependent exocytosis	18	0.0028135	0.00151564	0.016657	0.535274
GO:0045581	negative regulation of T cell differentiation	7	0.000803859	0.000188664	0.017082	0.535274
GO:0006691	leukotriene metabolic process	18	0.00120579	0.000371582	0.017217	0.535274
GO:0060048	cardiac muscle contraction	46	0.00442122	0.00275206	0.017232	0.535274
GO:0040011	locomotion	9	0.00160772	0.000656326	0.017379	0.535274
GO:0003333	amino acid transmembrane transport	31	0.00321543	0.00179848	0.017796	0.535274
GO:0048733	sebaceous gland development	7	0.00160772	0.000885006	0.017936	0.535274
GO:0001778	plasma membrane repair	12	0.00160772	0.0006665	0.018038	0.535274
GO:0042159	lipoprotein catabolic process	5	0.000803859	0.000236162	0.018086	0.535274
GO:0001662	behavioral fear response	31	0.00482315	0.00309217	0.0182	0.535274
GO:0000209	protein polyubiquitination	273	0.0245177	0.0200768	0.018394	0.535274
GO:0010575	positive regulation of vascular endothelial growth factor production	28	0.00321543	0.00183575	0.018493	0.535274
GO:0048681	negative regulation of axon regeneration	11	0.00200965	0.00102937	0.018501	0.535274
GO:1901381	positive regulation of potassium ion transmembrane transport	15	0.00200965	0.000974255	0.018553	0.535274
GO:0051646	mitochondrion localization	10	0.00120579	0.000418336	0.01876	0.535274
GO:0060992	response to fungicide	7	0.00120579	0.000430957	0.018803	0.535274
GO:0006323	DNA packaging	6	0.000803859	0.00030209	0.018902	0.535274
GO:0015804	neutral amino acid transport	15	0.00241158	0.00122674	0.018947	0.535274
GO:0007155	cell adhesion	664	0.0534566	0.0433111	0.019066	0.535274
GO:0042491	inner ear auditory receptor cell differentiation	8	0.00120579	0.000488182	0.01919	0.535274
GO:0030157	pancreatic juice secretion	7	0.000803859	0.000214991	0.01924	0.535274
GO:0048791	calcium ion-regulated exocytosis of neurotransmitter	18	0.0028135	0.00146296	0.01924	0.535274
GO:0046456	icosanoid biosynthetic process	6	0.000803859	0.000175717	0.019293	0.535274
GO:0010668	ectodermal cell differentiation	5	0.000803859	0.000242434	0.019393	0.535274
GO:0034613	cellular protein localization	74	0.00844051	0.00599965	0.019677	0.535274
GO:1902262	apoptotic process involved in blood vessel morphogenesis	5	0.000803859	0.000213278	0.019739	0.535274
GO:0006468	protein phosphorylation	622	0.0542605	0.0470125	0.020166	0.535274
GO:0021782	glial cell development	5	0.000803859	0.000290416	0.020591	0.535274
GO:0070842	aggresome assembly	6	0.000803859	0.000200393	0.020809	0.535274
GO:0043589	skin morphogenesis	11	0.00200965	0.00100575	0.020824	0.535274
GO:0007274	neuromuscular synaptic transmission	20	0.0028135	0.00153429	0.021149	0.535274
GO:0005979	regulation of glycogen biosynthetic process	12	0.00160772	0.000670778	0.021444	0.535274
GO:0046578	regulation of Ras protein signal transduction	9	0.00120579	0.000388344	0.021475	0.535274
GO:0045214	sarcomere organization	39	0.00321543	0.00185413	0.021588	0.535274
GO:0030207	chondroitin sulfate catabolic process	14	0.00160772	0.000675692	0.02171	0.535274
GO:0097186	amelogenesis	9	0.00160772	0.000696843	0.021783	0.535274
GO:0009642	response to light intensity	8	0.00120579	0.000468996	0.021818	0.535274
GO:1905564	positive regulation of vascular endothelial cell proliferation	25	0.0028135	0.00155904	0.021836	0.535274
GO:0006682	galactosylceramide biosynthetic process	6	0.00120579	0.000494783	0.021859	0.535274
GO:0044829	positive regulation by host of viral genome replication	8	0.00160772	0.000767002	0.022177	0.535274
GO:0030042	actin filament depolymerization	13	0.00200965	0.00103177	0.022345	0.535274
GO:0032956	regulation of actin cytoskeleton organization	79	0.00844051	0.00600628	0.02268	0.535274
GO:0050730	regulation of peptidyl-tyrosine phosphorylation	21	0.00241158	0.00129601	0.022807	0.535274
GO:0048148	behavioral response to cocaine	16	0.00200965	0.00102722	0.022844	0.535274
GO:0085029	extracellular matrix assembly	11	0.00160772	0.000716496	0.022847	0.535274
GO:0030036	actin cytoskeleton organization	196	0.0180868	0.014158	0.022895	0.535274
GO:0008285	negative regulation of cell population proliferation	458	0.0353698	0.0297948	0.023007	0.535274
GO:0060390	regulation of SMAD protein signal transduction	5	0.00120579	0.000517738	0.023013	0.535274
GO:0006941	striated muscle contraction	16	0.00160772	0.000759306	0.023073	0.535274
GO:0034497	protein localization to phagophore assembly site	14	0.00200965	0.000865654	0.023123	0.535274
GO:0010842	retina layer formation	25	0.00361736	0.00221981	0.023157	0.535274
GO:0048671	negative regulation of collateral sprouting	8	0.00200965	0.00113334	0.023617	0.535274
GO:0046626	regulation of insulin receptor signaling pathway	14	0.00200965	0.00108869	0.023751	0.535274
GO:2000643	positive regulation of early endosome to late endosome transport	8	0.00160772	0.000789301	0.023862	0.535274
GO:0061035	regulation of cartilage development	5	0.000803859	0.000235805	0.024074	0.535274
GO:0048490	anterograde synaptic vesicle transport	16	0.00160772	0.000691431	0.024157	0.535274
GO:0035811	negative regulation of urine volume	5	0.000803859	0.000255757	0.024405	0.535274
GO:0010248	establishment or maintenance of transmembrane electrochemical gradient	14	0.00160772	0.000701047	0.024698	0.535274
GO:0035900	response to isolation stress	8	0.00120579	0.000529604	0.024706	0.535274
GO:2000060	positive regulation of ubiquitin-dependent protein catabolic process	19	0.0028135	0.00164311	0.024894	0.535274
GO:0045652	regulation of megakaryocyte differentiation	70	0.00602894	0.00424447	0.025035	0.535274
GO:0051256	mitotic spindle midzone assembly	8	0.00120579	0.000368415	0.025237	0.535274
GO:0060155	platelet dense granule organization	9	0.00120579	0.000495447	0.025317	0.535274
GO:0048853	forebrain morphogenesis	9	0.00120579	0.000569174	0.02544	0.535274
GO:0010863	positive regulation of phospholipase C activity	13	0.00241158	0.0013618	0.025501	0.535274
GO:0072075	metanephric mesenchyme development	8	0.00160772	0.000798715	0.02552	0.535274
GO:0007179	transforming growth factor beta receptor signaling pathway	105	0.0116559	0.00898621	0.025747	0.535274
GO:1903670	regulation of sprouting angiogenesis	5	0.00120579	0.000489216	0.025791	0.535274
GO:0006915	apoptotic process	695	0.0470257	0.0409976	0.025865	0.535274
GO:0080182	histone H3-K4 trimethylation	20	0.0028135	0.00174919	0.025993	0.535274
GO:0036465	synaptic vesicle recycling	7	0.00120579	0.00039377	0.026135	0.535274
GO:0042994	cytoplasmic sequestering of transcription factor	9	0.00120579	0.000478045	0.02624	0.535274
GO:0030048	actin filament-based movement	19	0.0028135	0.00146532	0.02631	0.535274
GO:0006526	arginine biosynthetic process	5	0.000401929	5.46646e-05	0.026377	0.535274
GO:0050900	leukocyte migration	191	0.011254	0.00843732	0.026654	0.535274
GO:0003279	cardiac septum development	15	0.00241158	0.00137071	0.02678	0.535274
GO:0015718	monocarboxylic acid transport	18	0.00200965	0.00106631	0.026785	0.535274
GO:1902807	negative regulation of cell cycle G1/S phase transition	11	0.000803859	0.000283744	0.026807	0.535274
GO:0099175	regulation of postsynapse organization	20	0.0028135	0.00161265	0.026831	0.535274
GO:0035470	positive regulation of vascular wound healing	6	0.000803859	0.00026573	0.026864	0.535274
GO:0046600	negative regulation of centriole replication	7	0.00120579	0.000516785	0.026906	0.535274
GO:0009435	"NAD biosynthetic process"	14	0.00120579	0.000501129	0.026976	0.535274
GO:0001755	neural crest cell migration	47	0.00602894	0.00421693	0.027336	0.535274
GO:0007187	G protein-coupled receptor signaling pathway, coupled to cyclic nucleotide second messenger	63	0.00401929	0.00247133	0.027371	0.535274
GO:0050775	positive regulation of dendrite morphogenesis	21	0.00321543	0.00188178	0.02758	0.535274
GO:0045765	regulation of angiogenesis	35	0.00442122	0.00277409	0.027655	0.535274
GO:0048341	paraxial mesoderm formation	7	0.00120579	0.000462308	0.027791	0.535274
GO:0006477	protein sulfation	6	0.00120579	0.000511052	0.027806	0.535274
GO:0044381	glucose import in response to insulin stimulus	5	0.000803859	0.00023742	0.028295	0.535274
GO:0051495	positive regulation of cytoskeleton organization	5	0.000803859	0.000292671	0.028332	0.535274
GO:0042754	negative regulation of circadian rhythm	11	0.00160772	0.000768633	0.028335	0.535274
GO:0098943	neurotransmitter receptor transport, postsynaptic endosome to lysosome	7	0.000803859	0.000232402	0.028721	0.535274
GO:0030859	polarized epithelial cell differentiation	5	0.00120579	0.000565827	0.028739	0.535274
GO:0030242	autophagy of peroxisome	5	0.00120579	0.000599816	0.028991	0.535274
GO:0030206	chondroitin sulfate biosynthetic process	26	0.00321543	0.00189253	0.029443	0.535274
GO:0006511	ubiquitin-dependent protein catabolic process	325	0.0277331	0.0232839	0.02954	0.535274
GO:0048813	dendrite morphogenesis	39	0.0068328	0.00499174	0.029633	0.535274
GO:0090188	negative regulation of pancreatic juice secretion	5	0.00120579	0.000626857	0.030011	0.535274
GO:0042982	amyloid precursor protein metabolic process	11	0.00160772	0.000743661	0.030131	0.535274
GO:0015949	nucleobase-containing small molecule interconversion	27	0.00241158	0.00131098	0.030338	0.535274
GO:0044154	histone H3-K14 acetylation	8	0.00160772	0.000791146	0.030388	0.535274
GO:0006398	mRNA 3'-end processing by stem-loop binding and cleavage	5	0.000803859	0.000270181	0.030467	0.535274
GO:0006625	protein targeting to peroxisome	65	0.00442122	0.00286059	0.030478	0.535274
GO:0006942	regulation of striated muscle contraction	9	0.000803859	0.00024821	0.030609	0.535274
GO:0015825	L-serine transport	7	0.00120579	0.00049731	0.03062	0.535274
GO:0031571	mitotic G1 DNA damage checkpoint	9	0.00120579	0.000492265	0.030866	0.535274
GO:0006972	hyperosmotic response	9	0.00120579	0.000537086	0.031163	0.535274
GO:0043517	positive regulation of DNA damage response, signal transduction by p53 class mediator	14	0.00200965	0.00107679	0.031295	0.535274
GO:0032289	central nervous system myelin formation	5	0.000803859	0.000229382	0.031372	0.535274
GO:0000380	alternative mRNA splicing, via spliceosome	18	0.00241158	0.00137897	0.031923	0.535274
GO:0071499	cellular response to laminar fluid shear stress	9	0.00120579	0.000503534	0.032147	0.535274
GO:0060213	positive regulation of nuclear-transcribed mRNA poly(A) tail shortening	13	0.0028135	0.00184468	0.032251	0.535274
GO:0007612	learning	69	0.0096463	0.00732274	0.032279	0.535274
GO:0042307	positive regulation of protein import into nucleus	42	0.00442122	0.00285448	0.032289	0.535274
GO:0032689	negative regulation of interferon-gamma production	43	0.00241158	0.00126418	0.032485	0.535274
GO:1900006	positive regulation of dendrite development	17	0.0028135	0.00173842	0.032541	0.535274
GO:0044805	late nucleophagy	6	0.000803859	0.000259109	0.032798	0.535274
GO:1904465	negative regulation of matrix metallopeptidase secretion	12	0.000401929	7.85341e-05	0.033022	0.535274
GO:0034405	response to fluid shear stress	9	0.00120579	0.000495118	0.033153	0.535274
GO:0048839	inner ear development	56	0.00602894	0.00419691	0.033172	0.535274
GO:0046847	filopodium assembly	19	0.00241158	0.0014326	0.033258	0.535274
GO:0042119	neutrophil activation	13	0.00120579	0.000485714	0.033307	0.535274
GO:0010890	positive regulation of sequestering of triglyceride	9	0.000803859	0.000290854	0.033329	0.535274
GO:0003014	renal system process	10	0.00120579	0.000515122	0.033529	0.535274
GO:0032466	negative regulation of cytokinesis	7	0.000803859	0.000317237	0.033612	0.535274
GO:0018105	peptidyl-serine phosphorylation	165	0.017283	0.0140655	0.033668	0.535274
GO:1904637	cellular response to ionomycin	6	0.000803859	0.000311442	0.03392	0.535274
GO:0018393	internal peptidyl-lysine acetylation	7	0.00120579	0.000585518	0.034064	0.535274
GO:0150077	regulation of neuroinflammatory response	11	0.00120579	0.000485674	0.034102	0.535274
GO:0007212	dopamine receptor signaling pathway	19	0.00241158	0.00136122	0.034124	0.535274
GO:1902018	negative regulation of cilium assembly	11	0.00160772	0.000784392	0.034169	0.535274
GO:0097503	sialylation	21	0.00241158	0.00136651	0.034192	0.535274
GO:0008625	extrinsic apoptotic signaling pathway via death domain receptors	33	0.00321543	0.00193402	0.034241	0.535274
GO:0071880	adenylate cyclase-activating adrenergic receptor signaling pathway	18	0.00200965	0.00102736	0.034321	0.535274
GO:0008063	Toll signaling pathway	6	0.00120579	0.000566714	0.034359	0.535274
GO:1904714	regulation of chaperone-mediated autophagy	5	0.000803859	0.00025844	0.03465	0.535274
GO:0120009	intermembrane lipid transfer	45	0.00442122	0.00292562	0.034827	0.535274
GO:0055003	cardiac myofibril assembly	12	0.00160772	0.000777582	0.034871	0.535274
GO:0071260	cellular response to mechanical stimulus	80	0.00723473	0.00521306	0.034914	0.535274
GO:0032469	endoplasmic reticulum calcium ion homeostasis	17	0.00241158	0.00140573	0.035327	0.535274
GO:0042130	negative regulation of T cell proliferation	45	0.00361736	0.00223066	0.035353	0.535274
GO:0031647	regulation of protein stability	88	0.00803859	0.00589225	0.035429	0.535274
GO:0034379	very-low-density lipoprotein particle assembly	13	0.00120579	0.000501369	0.035449	0.535274
GO:0060122	inner ear receptor cell stereocilium organization	25	0.00241158	0.00134107	0.035608	0.535274
GO:0050672	negative regulation of lymphocyte proliferation	6	0.000803859	0.000297625	0.035705	0.535274
GO:0010960	magnesium ion homeostasis	7	0.00160772	0.000824536	0.035722	0.535274
GO:0008219	cell death	41	0.00442122	0.00293696	0.035729	0.535274
GO:0051208	sequestering of calcium ion	5	0.000803859	0.000259152	0.035997	0.535274
GO:0006622	protein targeting to lysosome	19	0.0028135	0.00165574	0.036091	0.535274
GO:0012501	programmed cell death	26	0.00200965	0.00101988	0.036388	0.535274
GO:0042220	response to cocaine	45	0.00482315	0.00326665	0.036465	0.535274
GO:0030220	platelet formation	19	0.00241158	0.00137456	0.036591	0.535274
GO:0014063	negative regulation of serotonin secretion	5	0.000803859	0.000306378	0.036628	0.535274
GO:1900037	regulation of cellular response to hypoxia	5	0.000803859	0.000349919	0.036657	0.535274
GO:0042633	hair cycle	16	0.00120579	0.000449667	0.036974	0.535274
GO:0010387	COP9 signalosome assembly	5	0.000803859	0.000248231	0.036985	0.535274
GO:0031123	RNA 3'-end processing	8	0.00200965	0.00114203	0.037078	0.535274
GO:2001214	positive regulation of vasculogenesis	12	0.00200965	0.0011163	0.037184	0.535274
GO:0051246	regulation of protein metabolic process	11	0.00160772	0.000847963	0.037206	0.535274
GO:0001946	lymphangiogenesis	12	0.00200965	0.00121461	0.037321	0.535274
GO:0070525	tRNA threonylcarbamoyladenosine metabolic process	5	0.000401929	7.00138e-05	0.037503	0.535842
GO:0098708	glucose import across plasma membrane	5	0.000803859	0.000273645	0.037736	0.537884
GO:0097187	dentinogenesis	6	0.000803859	0.000276829	0.037939	0.53895
GO:0071493	cellular response to UV-B	8	0.000803859	0.000262286	0.03806	0.53895
GO:1904141	positive regulation of microglial cell migration	7	0.000803859	0.000281965	0.038108	0.539029
GO:0015884	folic acid transport	8	0.000803859	0.000280478	0.03869	0.540705
GO:0150094	amyloid-beta clearance by cellular catabolic process	7	0.00120579	0.000539744	0.0388	0.540705
GO:0090267	positive regulation of mitotic cell cycle spindle assembly checkpoint	7	0.000803859	0.000286823	0.039056	0.540705
GO:0032623	interleukin-2 production	10	0.00120579	0.000570819	0.039232	0.540705
GO:0006940	regulation of smooth muscle contraction	20	0.00160772	0.000762537	0.039393	0.540705
GO:0006868	glutamine transport	8	0.00120579	0.000565028	0.039486	0.540705
GO:0006007	glucose catabolic process	7	0.000803859	0.00028478	0.039567	0.540705
GO:0002031	G protein-coupled receptor internalization	14	0.00120579	0.000503061	0.039985	0.540705
GO:1902261	positive regulation of delayed rectifier potassium channel activity	5	0.000803859	0.000314884	0.040069	0.540705
GO:1904668	positive regulation of ubiquitin protein ligase activity	14	0.00160772	0.00084113	0.040437	0.540705
GO:0006690	icosanoid metabolic process	10	0.000803859	0.000231241	0.040679	0.540705
GO:0060119	inner ear receptor cell development	9	0.00160772	0.000816876	0.04068	0.540705
GO:0043972	histone H3-K23 acetylation	5	0.00120579	0.000590217	0.040748	0.540705
GO:0003289	atrial septum primum morphogenesis	5	0.00120579	0.000607901	0.040757	0.540705
GO:0035303	regulation of dephosphorylation	6	0.000803859	0.000295061	0.040855	0.540705
GO:0051279	regulation of release of sequestered calcium ion into cytosol	17	0.00200965	0.00112132	0.041131	0.540827
GO:0061709	reticulophagy	12	0.00160772	0.000868821	0.041163	0.540827
GO:0043249	erythrocyte maturation	16	0.00200965	0.00115432	0.041173	0.540827
GO:0045838	positive regulation of membrane potential	5	0.000803859	0.000324642	0.041579	0.542603
GO:0019226	transmission of nerve impulse	20	0.00241158	0.0014377	0.041608	0.542603
GO:0035336	long-chain fatty-acyl-CoA metabolic process	7	0.00120579	0.000595116	0.041775	0.542916
GO:0007417	central nervous system development	149	0.0136656	0.0108776	0.04189	0.542946
GO:0032886	regulation of microtubule-based process	10	0.00200965	0.00118156	0.04253	0.545891
GO:0032438	melanosome organization	23	0.00241158	0.00143987	0.042561	0.545891
GO:0006569	tryptophan catabolic process	10	0.000803859	0.000242393	0.042563	0.545891
GO:0007127	meiosis I	8	0.000803859	0.000325386	0.042875	0.547347
GO:0010952	positive regulation of peptidase activity	15	0.00160772	0.00082647	0.042899	0.547347
GO:0071420	cellular response to histamine	8	0.00160772	0.00089753	0.043213	0.548188
GO:0097647	amylin receptor signaling pathway	7	0.000803859	0.000317862	0.043956	0.548188
GO:0060749	mammary gland alveolus development	17	0.00241158	0.00142469	0.043972	0.548188
GO:0007033	vacuole organization	9	0.000803859	0.000308507	0.044215	0.548188
GO:0014009	glial cell proliferation	9	0.00120579	0.000544698	0.04424	0.548188
GO:0070314	G1 to G0 transition	6	0.000803859	0.000287065	0.044323	0.548188
GO:0007210	serotonin receptor signaling pathway	7	0.000803859	0.000243676	0.044332	0.548188
GO:0098868	bone growth	5	0.000803859	0.000297122	0.044642	0.550478
GO:0030282	bone mineralization	45	0.00401929	0.00266048	0.044682	0.550478
GO:0010212	response to ionizing radiation	49	0.00401929	0.00260912	0.044869	0.550478
GO:0032486	Rap protein signal transduction	10	0.00200965	0.00120324	0.044926	0.550478
GO:0015914	phospholipid transport	44	0.00482315	0.0033394	0.045045	0.550478
GO:0019262	N-acetylneuraminate catabolic process	6	0.000803859	0.000284386	0.045503	0.550478
GO:0015908	fatty acid transport	15	0.00160772	0.000818286	0.045553	0.550478
GO:0061088	regulation of sequestering of zinc ion	5	0.000803859	0.000343039	0.045582	0.550478
GO:0006509	membrane protein ectodomain proteolysis	21	0.0028135	0.00170008	0.04578	0.550478
GO:0010715	regulation of extracellular matrix disassembly	5	0.000803859	0.000350151	0.045949	0.550478
GO:0048007	antigen processing and presentation, exogenous lipid antigen via MHC class Ib	7	0.000803859	0.000267493	0.046062	0.550478
GO:0051291	protein heterooligomerization	8	0.00120579	0.000609373	0.046109	0.550478
GO:0046464	acylglycerol catabolic process	5	0.000803859	0.000316258	0.046383	0.550478
GO:0070301	cellular response to hydrogen peroxide	73	0.00602894	0.00438247	0.046434	0.550478
GO:0030901	midbrain development	35	0.00442122	0.00305193	0.046446	0.550478
GO:0010460	positive regulation of heart rate	23	0.00241158	0.001395	0.04657	0.550478
GO:0051604	protein maturation	20	0.00160772	0.00076065	0.046992	0.550478
GO:0022898	regulation of transmembrane transporter activity	8	0.00120579	0.000570127	0.047299	0.550478
GO:0061564	axon development	16	0.00241158	0.00145709	0.047325	0.550478
GO:0031507	heterochromatin assembly	5	0.00120579	0.000609106	0.047455	0.550478
GO:0060348	bone development	64	0.0068328	0.00505147	0.047595	0.551095
GO:1902616	acyl carnitine transmembrane transport	5	0.000401929	9.28543e-05	0.047954	0.553718
GO:1904893	negative regulation of receptor signaling pathway via STAT	8	0.000401929	0.000136405	0.048034	0.553718
GO:0019432	triglyceride biosynthetic process	19	0.00200965	0.00116025	0.048119	0.553718
GO:0046716	muscle cell cellular homeostasis	23	0.0028135	0.00183726	0.048664	0.553718
GO:0001956	positive regulation of neurotransmitter secretion	7	0.000803859	0.000287565	0.048841	0.553718
GO:1903818	positive regulation of voltage-gated potassium channel activity	10	0.00120579	0.000592784	0.048886	0.553718
GO:0009744	response to sucrose	7	0.000803859	0.000284036	0.048926	0.553718
GO:0050982	detection of mechanical stimulus	13	0.00120579	0.000564765	0.048929	0.553718
GO:0006561	proline biosynthetic process	5	0.000401929	8.91309e-05	0.049071	0.553718
GO:0031638	zymogen activation	20	0.00120579	0.000489491	0.049086	0.553718
GO:0051216	cartilage development	80	0.00803859	0.00610902	0.04914	0.553718
GO:0032026	response to magnesium ion	12	0.00160772	0.000857171	0.049351	0.553718
GO:2000035	regulation of stem cell division	9	0.00120579	0.00058197	0.049431	0.553718
GO:0035278	miRNA mediated inhibition of translation	98	0.00241158	0.00158605	0.049547	0.553718
GO:0031936	negative regulation of chromatin silencing	13	0.00120579	0.000590231	0.049735	0.553718
GO:0044241	lipid digestion	8	0.000401929	9.59302e-05	0.049746	0.553718
GO:0006348	chromatin silencing at telomere	9	0.00120579	0.000565075	0.049917	0.553718
GO:0000045	autophagosome assembly	59	0.00562701	0.0039699	0.050004	0.553718
GO:0061734	parkin-mediated stimulation of mitophagy in response to mitochondrial depolarization	5	0.000803859	0.000319949	0.05008	0.553718
GO:0018107	peptidyl-threonine phosphorylation	68	0.00844051	0.00647832	0.050113	0.553718
GO:1903546	protein localization to photoreceptor outer segment	7	0.000803859	0.000348061	0.050301	0.553718
GO:0036109	alpha-linolenic acid metabolic process	13	0.00160772	0.000812872	0.050387	0.553718
GO:0071394	cellular response to testosterone stimulus	10	0.00160772	0.000896207	0.050401	0.553718
GO:0000082	G1/S transition of mitotic cell cycle	103	0.0096463	0.00758934	0.050481	0.553718
GO:0071875	adrenergic receptor signaling pathway	12	0.00200965	0.00124242	0.050681	0.553718
GO:0045444	fat cell differentiation	76	0.00803859	0.00616642	0.050739	0.553718
GO:0016322	neuron remodeling	12	0.00160772	0.000893049	0.051046	0.554176
GO:0061061	muscle structure development	10	0.00120579	0.000579772	0.051523	0.555405
GO:0033157	regulation of intracellular protein transport	8	0.00160772	0.000892117	0.051583	0.555405
GO:0043217	myelin maintenance	5	0.000803859	0.000315716	0.051596	0.555405
GO:0030214	hyaluronan catabolic process	15	0.00160772	0.000841198	0.051596	0.555405
GO:0007406	negative regulation of neuroblast proliferation	9	0.00120579	0.000594149	0.051699	0.555405
GO:0030335	positive regulation of cell migration	257	0.0221061	0.0187678	0.051744	0.555405
GO:0045880	positive regulation of smoothened signaling pathway	38	0.00321543	0.0020574	0.051989	0.555405
GO:0042117	monocyte activation	8	0.00120579	0.000660819	0.05199	0.555405
GO:0071636	positive regulation of transforming growth factor beta production	10	0.00120579	0.000540418	0.052109	0.555742
GO:0015696	ammonium transport	7	0.000803859	0.000343156	0.052211	0.555896
GO:0072488	ammonium transmembrane transport	8	0.000803859	0.000343156	0.052211	0.555896
GO:0035914	skeletal muscle cell differentiation	48	0.00522508	0.003774	0.052293	0.556303
GO:0001774	microglial cell activation	31	0.00200965	0.00113167	0.052531	0.557036
GO:0048536	spleen development	34	0.00321543	0.00212929	0.052535	0.557036
GO:0060591	chondroblast differentiation	5	0.000803859	0.00032233	0.052572	0.557036
GO:0030516	regulation of axon extension	15	0.00200965	0.00119515	0.052599	0.557036
GO:1900740	positive regulation of protein insertion into mitochondrial membrane involved in apoptotic signaling pathway	27	0.00361736	0.00247837	0.052771	0.557036
GO:0030239	myofibril assembly	14	0.00120579	0.000586111	0.052978	0.557036
GO:0007623	circadian rhythm	92	0.00924437	0.00724244	0.053007	0.557036
GO:0086012	membrane depolarization during cardiac muscle cell action potential	12	0.00200965	0.0011894	0.053068	0.557036
GO:0018149	peptide cross-linking	28	0.00160772	0.00081714	0.053159	0.557036
GO:0010631	epithelial cell migration	5	0.000803859	0.0003211	0.053328	0.557222
GO:0006612	protein targeting to membrane	53	0.00482315	0.0034007	0.054101	0.559974
GO:1903298	negative regulation of hypoxia-induced intrinsic apoptotic signaling pathway	6	0.000803859	0.000328229	0.054121	0.559974
GO:1903895	negative regulation of IRE1-mediated unfolded protein response	5	0.000803859	0.000316422	0.054215	0.560095
GO:0032602	chemokine production	5	0.000401929	9.45888e-05	0.054313	0.560095
GO:1900153	positive regulation of nuclear-transcribed mRNA catabolic process, deadenylation-dependent decay	15	0.0028135	0.00194771	0.05447	0.560095
GO:0051793	medium-chain fatty acid catabolic process	5	0.000803859	0.000360318	0.054497	0.560095
GO:0007044	cell-substrate junction assembly	5	0.00120579	0.000601793	0.05457	0.560095
GO:0043981	histone H4-K5 acetylation	16	0.00241158	0.00148543	0.054577	0.560095
GO:0043982	histone H4-K8 acetylation	16	0.00241158	0.00148543	0.054577	0.560095
GO:0032713	negative regulation of interleukin-4 production	7	0.000803859	0.000303444	0.054668	0.560095
GO:0046620	regulation of organ growth	9	0.00160772	0.00095163	0.054717	0.560095
GO:0044245	polysaccharide digestion	6	0.000401929	9.50908e-05	0.055007	0.560754
GO:0080135	regulation of cellular response to stress	7	0.00120579	0.000679521	0.055276	0.562684
GO:1904938	planar cell polarity pathway involved in axon guidance	5	0.00120579	0.000676301	0.055285	0.562684
GO:0019229	regulation of vasoconstriction	22	0.00200965	0.00113265	0.055573	0.564235
GO:0060294	cilium movement involved in cell motility	14	0.000401929	9.68927e-05	0.055615	0.564235
GO:0045579	positive regulation of B cell differentiation	13	0.00120579	0.000579454	0.055839	0.565604
GO:0046323	glucose import	7	0.00120579	0.000633436	0.056161	0.566696
GO:1902110	positive regulation of mitochondrial membrane permeability involved in apoptotic process	8	0.000803859	0.000392064	0.056291	0.566696
GO:0035988	chondrocyte proliferation	13	0.00160772	0.000873749	0.056377	0.566696
GO:0050884	neuromuscular process controlling posture	13	0.00200965	0.00122084	0.056383	0.566696
GO:0015824	proline transport	8	0.00120579	0.000619488	0.056573	0.567159
GO:0001894	tissue homeostasis	23	0.0028135	0.00176867	0.056881	0.569223
GO:0061028	establishment of endothelial barrier	18	0.00241158	0.00157862	0.056986	0.569223
GO:0043569	negative regulation of insulin-like growth factor receptor signaling pathway	10	0.00120579	0.000654147	0.057138	0.569223
GO:0048704	embryonic skeletal system morphogenesis	55	0.00562701	0.004075	0.057167	0.569223
GO:0001676	long-chain fatty acid metabolic process	24	0.00200965	0.00116074	0.057308	0.569223
GO:1901380	negative regulation of potassium ion transmembrane transport	11	0.00160772	0.000937862	0.057325	0.569223
GO:0030212	hyaluronan metabolic process	12	0.00120579	0.000576346	0.058176	0.569223
GO:0019068	virion assembly	12	0.00120579	0.000577089	0.058423	0.569223
GO:0070837	dehydroascorbic acid transport	7	0.000803859	0.000312979	0.058431	0.569223
GO:0009437	carnitine metabolic process	8	0.000803859	0.000326871	0.058459	0.569223
GO:0060392	negative regulation of SMAD protein signal transduction	7	0.000803859	0.000309408	0.058665	0.569223
GO:0002376	immune system process	827	0.0261254	0.0222482	0.058682	0.569223
GO:0051302	regulation of cell division	12	0.00120579	0.000590244	0.058755	0.569223
GO:0071806	protein transmembrane transport	8	0.000803859	0.000324327	0.05892	0.569223
GO:0048820	hair follicle maturation	7	0.00120579	0.000674391	0.058955	0.569223
GO:0045773	positive regulation of axon extension	35	0.00442122	0.00313725	0.059028	0.569223
GO:0014049	positive regulation of glutamate secretion	9	0.00120579	0.000613313	0.059231	0.569532
GO:0097192	extrinsic apoptotic signaling pathway in absence of ligand	34	0.00361736	0.00249201	0.05939	0.570157
GO:0060041	retina development in camera-type eye	71	0.00643087	0.00477757	0.05945	0.570157
GO:0033627	cell adhesion mediated by integrin	23	0.0028135	0.00181506	0.059686	0.570157
GO:0048713	regulation of oligodendrocyte differentiation	5	0.000803859	0.000342497	0.059943	0.570668
GO:0045746	negative regulation of Notch signaling pathway	41	0.00401929	0.00273032	0.060014	0.570668
GO:0071466	cellular response to xenobiotic stimulus	6	0.000803859	0.000327779	0.060068	0.570668
GO:0007196	adenylate cyclase-inhibiting G protein-coupled glutamate receptor signaling pathway	7	0.00120579	0.000623245	0.060589	0.571986
GO:2000001	regulation of DNA damage checkpoint	9	0.00120579	0.000592911	0.06064	0.571986
GO:0010759	positive regulation of macrophage chemotaxis	19	0.00200965	0.00117899	0.060702	0.571986
GO:0006996	organelle organization	15	0.00160772	0.000907478	0.061014	0.57203
GO:0019388	galactose catabolic process	7	0.000803859	0.000354667	0.061234	0.572328
GO:0045589	regulation of regulatory T cell differentiation	16	0.00160772	0.000878774	0.0615	0.573424
GO:0061844	antimicrobial humoral immune response mediated by antimicrobial peptide	72	0.00241158	0.00136976	0.061515	0.573424
GO:0010039	response to iron ion	19	0.00200965	0.00119878	0.061664	0.573424
GO:0061029	eyelid development in camera-type eye	13	0.00200965	0.0012049	0.061736	0.573424
GO:0034115	negative regulation of heterotypic cell-cell adhesion	11	0.00120579	0.000632977	0.062491	0.577673
GO:2000323	negative regulation of glucocorticoid receptor signaling pathway	6	0.00120579	0.000674231	0.062811	0.579068
GO:0051000	positive regulation of nitric-oxide synthase activity	23	0.00241158	0.00151441	0.06284	0.579068
GO:0046085	adenosine metabolic process	8	0.000803859	0.000328753	0.06308	0.579068
GO:0033629	negative regulation of cell adhesion mediated by integrin	10	0.00160772	0.000956389	0.063235	0.579068
GO:0042048	olfactory behavior	8	0.00120579	0.000649399	0.063401	0.579068
GO:2000774	positive regulation of cellular senescence	20	0.00160772	0.000938145	0.063576	0.579068
GO:0031100	animal organ regeneration	43	0.00401929	0.00280194	0.063651	0.579068
GO:1901215	negative regulation of neuron death	64	0.00522508	0.00385696	0.063896	0.579068
GO:0061588	calcium activated phospholipid scrambling	5	0.000803859	0.000392407	0.063931	0.579068
GO:0061591	calcium activated galactosylceramide scrambling	5	0.000803859	0.000392407	0.063931	0.579068
GO:0061590	calcium activated phosphatidylcholine scrambling	5	0.000803859	0.000392407	0.063931	0.579068
GO:0031102	neuron projection regeneration	5	0.000803859	0.000329358	0.064075	0.579068
GO:0008630	intrinsic apoptotic signaling pathway in response to DNA damage	50	0.00401929	0.00277895	0.064076	0.579068
GO:0040012	regulation of locomotion	8	0.000803859	0.000329413	0.064153	0.579068
GO:0050852	T cell receptor signaling pathway	177	0.0116559	0.00944098	0.064308	0.579068
GO:0016572	histone phosphorylation	13	0.00160772	0.000872729	0.064383	0.579068
GO:0060075	regulation of resting membrane potential	9	0.00120579	0.000608815	0.064494	0.579068
GO:0008209	androgen metabolic process	19	0.00200965	0.0012181	0.064508	0.579068
GO:0006885	regulation of pH	20	0.00241158	0.00149957	0.064671	0.579754
GO:0097267	omega-hydroxylase P450 pathway	9	0.000803859	0.000326165	0.064763	0.579754
GO:0035022	positive regulation of Rac protein signal transduction	7	0.00160772	0.000958194	0.065241	0.580963
GO:0007006	mitochondrial membrane organization	5	0.000803859	0.000326386	0.06577	0.584585
GO:0060840	artery development	8	0.00160772	0.00100134	0.065984	0.584966
GO:0070200	establishment of protein localization to telomere	5	0.000401929	0.000111189	0.065994	0.584966
GO:0048856	anatomical structure development	60	0.00643087	0.00490884	0.066182	0.586105
GO:0033278	cell proliferation in midbrain	6	0.00120579	0.000714673	0.066246	0.586105
GO:0021678	third ventricle development	5	0.000803859	0.000366485	0.066261	0.586105
GO:0046881	positive regulation of follicle-stimulating hormone secretion	6	0.000803859	0.000367359	0.066787	0.587994
GO:0002690	positive regulation of leukocyte chemotaxis	14	0.00120579	0.00056588	0.066881	0.587994
GO:0006284	base-excision repair	34	0.00241158	0.00147184	0.066989	0.587994
GO:0050855	regulation of B cell receptor signaling pathway	11	0.00160772	0.000971564	0.066999	0.587994
GO:0043647	inositol phosphate metabolic process	47	0.00401929	0.00282362	0.067001	0.587994
GO:0051170	import into nucleus	21	0.00160772	0.000880414	0.067279	0.588144
GO:0055062	phosphate ion homeostasis	7	0.000803859	0.000332602	0.067322	0.588144
GO:0034976	response to endoplasmic reticulum stress	91	0.00803859	0.00629563	0.067503	0.588144
GO:0060055	angiogenesis involved in wound healing	11	0.00160772	0.000955252	0.067552	0.588144
GO:0006513	protein monoubiquitination	33	0.00361736	0.00256276	0.067708	0.588144
GO:0071425	hematopoietic stem cell proliferation	17	0.00160772	0.000884463	0.067891	0.588144
GO:1901799	negative regulation of proteasomal protein catabolic process	14	0.00120579	0.000579499	0.067983	0.588144
GO:0097178	ruffle assembly	14	0.00160772	0.000902393	0.068008	0.588144
GO:0051180	vitamin transport	8	0.000803859	0.000336349	0.06817	0.588144
GO:0050920	regulation of chemotaxis	8	0.00120579	0.000611628	0.068189	0.588144
GO:0032682	negative regulation of chemokine production	11	0.000803859	0.000377835	0.068275	0.588144
GO:0030836	positive regulation of actin filament depolymerization	9	0.00120579	0.000664093	0.068476	0.588144
GO:0071294	cellular response to zinc ion	23	0.00160772	0.000956033	0.06855	0.588144
GO:0060761	negative regulation of response to cytokine stimulus	8	0.000803859	0.000392408	0.068675	0.588144
GO:0043031	negative regulation of macrophage activation	14	0.000803859	0.00032437	0.068714	0.588144
GO:0051781	positive regulation of cell division	48	0.00442122	0.00308156	0.06878	0.588312
GO:0050904	diapedesis	5	0.000803859	0.000359065	0.068885	0.588418
GO:0010817	regulation of hormone levels	5	0.000803859	0.000320135	0.069034	0.58871
GO:2000647	negative regulation of stem cell proliferation	6	0.000803859	0.000318028	0.069133	0.58871
GO:0006003	fructose 2,6-bisphosphate metabolic process	5	0.000803859	0.000352414	0.069432	0.588859
GO:0048489	synaptic vesicle transport	17	0.00241158	0.00156206	0.069458	0.588859
GO:0010718	positive regulation of epithelial to mesenchymal transition	47	0.00522508	0.00380307	0.069861	0.589294
GO:2000010	positive regulation of protein localization to cell surface	17	0.00160772	0.000873887	0.069901	0.589294
GO:0032696	negative regulation of interleukin-13 production	7	0.000803859	0.000374225	0.070007	0.589294
GO:1990138	neuron projection extension	24	0.0028135	0.00187136	0.070368	0.590212
GO:0042634	regulation of hair cycle	6	0.00120579	0.000701152	0.070432	0.590212
GO:0072678	T cell migration	8	0.000803859	0.000367694	0.070582	0.590601
GO:0046883	regulation of hormone secretion	5	0.000401929	0.000116682	0.070985	0.592615
GO:0006633	fatty acid biosynthetic process	73	0.00522508	0.00383416	0.071043	0.592615
GO:0042058	regulation of epidermal growth factor receptor signaling pathway	11	0.00120579	0.000634455	0.071056	0.592615
GO:0070936	protein K48-linked ubiquitination	58	0.0068328	0.00530249	0.071429	0.594474
GO:0001501	skeletal system development	155	0.0136656	0.0112945	0.071466	0.594474
GO:1900223	positive regulation of amyloid-beta clearance	8	0.000803859	0.000369611	0.071736	0.595575
GO:0048712	negative regulation of astrocyte differentiation	9	0.00120579	0.000651744	0.072009	0.597035
GO:0008360	regulation of cell shape	151	0.0124598	0.0101849	0.072307	0.599115
GO:0016139	glycoside catabolic process	5	0.000401929	0.000117866	0.072528	0.599382
GO:2000059	negative regulation of ubiquitin-dependent protein catabolic process	18	0.00160772	0.000896911	0.073235	0.600536
GO:0002437	inflammatory response to antigenic stimulus	23	0.00200965	0.00125053	0.07331	0.600764
GO:0050801	ion homeostasis	19	0.00241158	0.0016616	0.073389	0.600977
GO:0098712	L-glutamate import across plasma membrane	9	0.00160772	0.000973178	0.073438	0.600977
GO:0051966	regulation of synaptic transmission, glutamatergic	32	0.00401929	0.00293914	0.073478	0.600977
GO:0045637	regulation of myeloid cell differentiation	11	0.00160772	0.00100439	0.073534	0.601048
GO:0051151	negative regulation of smooth muscle cell differentiation	9	0.00160772	0.00101455	0.074236	0.604065
GO:0043631	RNA polyadenylation	7	0.00160772	0.00103175	0.07471	0.60616
GO:0032098	regulation of appetite	7	0.000803859	0.000395318	0.074948	0.606622
GO:0021513	spinal cord dorsal/ventral patterning	5	0.000803859	0.000353949	0.075313	0.607899
GO:0071345	cellular response to cytokine stimulus	63	0.00562701	0.00427405	0.075411	0.607899
GO:0061099	negative regulation of protein tyrosine kinase activity	15	0.00160772	0.000921063	0.075726	0.608726
GO:0022407	regulation of cell-cell adhesion	14	0.00200965	0.00127059	0.075775	0.608726
GO:0032740	positive regulation of interleukin-17 production	18	0.00120579	0.000596232	0.07582	0.608726
GO:0006978	DNA damage response, signal transduction by p53 class mediator resulting in transcription of p21 class mediator	15	0.00160772	0.000961436	0.075911	0.608726
GO:1904685	positive regulation of metalloendopeptidase activity	9	0.000401929	0.000138562	0.075967	0.608728
GO:0048477	oogenesis	44	0.0028135	0.00182213	0.076048	0.608728
GO:0032509	endosome transport via multivesicular body sorting pathway	15	0.00160772	0.000917088	0.076055	0.608728
GO:0031532	actin cytoskeleton reorganization	57	0.00643087	0.00501133	0.076198	0.609473
GO:0006820	anion transport	29	0.0028135	0.00191713	0.076302	0.609473
GO:0032400	melanosome localization	6	0.000803859	0.000350429	0.076737	0.609958
GO:0032287	peripheral nervous system myelin maintenance	8	0.00120579	0.00067713	0.076775	0.609958
GO:0034389	lipid droplet organization	21	0.00160772	0.000924855	0.076881	0.609958
GO:0019934	cGMP-mediated signaling	20	0.00200965	0.00127025	0.077743	0.61404
GO:0070292	N-acylphosphatidylethanolamine metabolic process	9	0.000803859	0.000345194	0.077864	0.61404
GO:0051453	regulation of intracellular pH	29	0.0028135	0.00193491	0.078019	0.614763
GO:0060415	muscle tissue morphogenesis	6	0.000803859	0.00035018	0.078166	0.615158
GO:0042592	homeostatic process	11	0.00160772	0.00099891	0.078403	0.616641
GO:0021695	cerebellar cortex development	7	0.000803859	0.000328814	0.078675	0.617432
GO:0051281	positive regulation of release of sequestered calcium ion into cytosol	30	0.00241158	0.00154798	0.078698	0.617432
GO:0033146	regulation of intracellular estrogen receptor signaling pathway	16	0.00200965	0.0012917	0.079127	0.618886
GO:0001775	cell activation	13	0.00120579	0.000679995	0.079185	0.618959
GO:0010470	regulation of gastrulation	10	0.00160772	0.000955093	0.079239	0.619
GO:0086004	regulation of cardiac muscle cell contraction	13	0.00200965	0.00127503	0.079634	0.620559
GO:0086002	cardiac muscle cell action potential involved in contraction	16	0.00241158	0.00164751	0.079971	0.620732
GO:0090331	negative regulation of platelet aggregation	12	0.00160772	0.000948449	0.080148	0.620756
GO:0034378	chylomicron assembly	11	0.000803859	0.000406091	0.080307	0.621338
GO:0008593	regulation of Notch signaling pathway	21	0.00200965	0.00125273	0.080398	0.621555
GO:0031536	positive regulation of exit from mitosis	5	0.000401929	0.000135217	0.080505	0.621612
GO:0030299	intestinal cholesterol absorption	10	0.000803859	0.000339811	0.080605	0.621612
GO:0032732	positive regulation of interleukin-1 production	11	0.000803859	0.000357109	0.08065	0.621612
GO:0070131	positive regulation of mitochondrial translation	17	0.000803859	0.00031314	0.080861	0.622483
GO:1904158	axonemal central apparatus assembly	5	0.000401929	0.00013569	0.080998	0.622736
GO:0034382	chylomicron remnant clearance	8	0.000401929	0.000150185	0.081037	0.622736
GO:0050848	regulation of calcium-mediated signaling	12	0.00120579	0.00061519	0.081771	0.626775
GO:0044320	cellular response to leptin stimulus	10	0.00160772	0.00100163	0.08179	0.626775
GO:0021612	facial nerve structural organization	9	0.00160772	0.00102018	0.081857	0.626775
GO:0072383	plus-end-directed vesicle transport along microtubule	8	0.00160772	0.000959248	0.082222	0.627764
GO:0002377	immunoglobulin production	112	0.00120579	0.000641361	0.082338	0.627765
GO:0008088	axo-dendritic transport	5	0.000803859	0.000377689	0.082441	0.627797
GO:0007159	leukocyte cell-cell adhesion	30	0.00241158	0.00153605	0.082716	0.62876
GO:0043374	CD8-positive, alpha-beta T cell differentiation	5	0.000803859	0.000384189	0.083074	0.630177
GO:0007018	microtubule-based movement	80	0.00562701	0.00419584	0.084096	0.634664
GO:0039536	negative regulation of RIG-I signaling pathway	8	0.000803859	0.000364356	0.084203	0.634664
GO:0035864	response to potassium ion	5	0.000401929	0.000137022	0.084216	0.634664
GO:0001508	action potential	21	0.00241158	0.00165643	0.084295	0.634664
GO:0030595	leukocyte chemotaxis	25	0.00200965	0.00120464	0.084507	0.634777
GO:0090370	negative regulation of cholesterol efflux	21	0.000401929	0.000133929	0.084809	0.635906
GO:0001867	complement activation, lectin pathway	10	0.000803859	0.000366028	0.085074	0.635906
GO:0001915	negative regulation of T cell mediated cytotoxicity	6	0.000803859	0.000372666	0.085137	0.635906
GO:0009913	epidermal cell differentiation	9	0.00120579	0.000674552	0.085145	0.635906
GO:0021889	olfactory bulb interneuron differentiation	6	0.000803859	0.000440426	0.085149	0.635906
GO:2001140	positive regulation of phospholipid transport	5	0.000401929	0.000139464	0.085197	0.635906
GO:0048266	behavioral response to pain	15	0.00120579	0.000645066	0.085242	0.635906
GO:0098662	inorganic cation transmembrane transport	9	0.000803859	0.000382764	0.085258	0.635906
GO:0006382	adenosine to inosine editing	7	0.000803859	0.000376102	0.085365	0.63633
GO:0008635	activation of cysteine-type endopeptidase activity involved in apoptotic process by cytochrome c	7	0.000803859	0.000362144	0.085535	0.636952
GO:0032757	positive regulation of interleukin-8 production	56	0.0028135	0.00184766	0.085645	0.636952
GO:0048706	embryonic skeletal system development	44	0.00482315	0.00360768	0.085649	0.636952
GO:0030950	establishment or maintenance of actin cytoskeleton polarity	5	0.000803859	0.000439575	0.086648	0.643251
GO:0003091	renal water homeostasis	36	0.00361736	0.00262393	0.087085	0.644443
GO:0060173	limb development	45	0.00522508	0.00400442	0.087349	0.645437
GO:2000405	negative regulation of T cell migration	5	0.000803859	0.000386399	0.087936	0.647993
GO:0090314	positive regulation of protein targeting to membrane	31	0.0028135	0.00186462	0.087943	0.647993
GO:1905522	negative regulation of macrophage migration	5	0.000401929	0.000133516	0.088052	0.647993
GO:0030210	heparin biosynthetic process	12	0.00160772	0.00102764	0.088268	0.649207
GO:2000435	negative regulation of protein neddylation	5	0.000401929	0.000182516	0.08855	0.650152
GO:0010595	positive regulation of endothelial cell migration	68	0.00602894	0.00466783	0.088644	0.650466
GO:0010825	positive regulation of centrosome duplication	5	0.000803859	0.000453415	0.089465	0.654599
GO:0008585	female gonad development	26	0.0028135	0.00188759	0.089617	0.655334
GO:0051492	regulation of stress fiber assembly	18	0.00200965	0.00131116	0.089798	0.655529
GO:0045793	positive regulation of cell size	11	0.00160772	0.000994352	0.089848	0.655529
GO:0097368	establishment of Sertoli cell barrier	5	0.000803859	0.000493384	0.090087	0.655529
GO:0000212	meiotic spindle organization	8	0.000803859	0.000413052	0.090113	0.655529
GO:0038203	TORC2 signaling	6	0.000803859	0.000439679	0.090246	0.655529
GO:0060674	placenta blood vessel development	14	0.00241158	0.00166787	0.090263	0.655529
GO:0006464	cellular protein modification process	106	0.00763666	0.00610181	0.090436	0.65641
GO:0042538	hyperosmotic salinity response	7	0.000401929	0.000148157	0.090769	0.658075
GO:0043651	linoleic acid metabolic process	21	0.00160772	0.000910788	0.090888	0.658556
GO:0009988	cell-cell recognition	6	0.000803859	0.000370588	0.091171	0.65986
GO:0006919	activation of cysteine-type endopeptidase activity involved in apoptotic process	92	0.00643087	0.00494474	0.091343	0.660266
GO:0070863	positive regulation of protein exit from endoplasmic reticulum	11	0.00120579	0.000676242	0.091412	0.660266
GO:0007506	gonadal mesoderm development	8	0.000401929	0.000253754	0.091435	0.660266
GO:0071621	granulocyte chemotaxis	5	0.000401929	0.000144675	0.091583	0.660814
GO:0040014	regulation of multicellular organism growth	28	0.0028135	0.00197398	0.091615	0.660814
GO:0031642	negative regulation of myelination	9	0.00120579	0.000698017	0.091754	0.661066
GO:0006004	fucose metabolic process	7	0.000803859	0.000366696	0.091956	0.661198
GO:1901796	regulation of signal transduction by p53 class mediator	131	0.0100482	0.00822597	0.092061	0.661198
GO:0045446	endothelial cell differentiation	14	0.00160772	0.000993002	0.092198	0.661198
GO:0038095	Fc-epsilon receptor signaling pathway	166	0.0096463	0.00795296	0.092233	0.661198
GO:1900103	positive regulation of endoplasmic reticulum unfolded protein response	5	0.000803859	0.00042181	0.092333	0.661198
GO:0038114	interleukin-21-mediated signaling pathway	8	0.000803859	0.000358731	0.092364	0.661198
GO:0051402	neuron apoptotic process	42	0.00442122	0.00331554	0.092861	0.663397
GO:0061384	heart trabecula morphogenesis	8	0.00120579	0.000701442	0.093158	0.663888
GO:0098780	response to mitochondrial depolarisation	6	0.000803859	0.000394985	0.093189	0.663888
GO:0010729	positive regulation of hydrogen peroxide biosynthetic process	5	0.000401929	0.000152116	0.093412	0.664344
GO:1905606	regulation of presynapse assembly	34	0.00442122	0.00340516	0.093478	0.664442
GO:1902975	mitotic DNA replication initiation	5	0.000401929	0.000135706	0.093572	0.664679
GO:0061889	negative regulation of astrocyte activation	5	0.000401929	0.000154306	0.093781	0.665478
GO:0002430	complement receptor mediated signaling pathway	12	0.000803859	0.000365507	0.094444	0.667031
GO:0019371	cyclooxygenase pathway	11	0.000803859	0.000373925	0.094519	0.667031
GO:0050776	regulation of immune response	219	0.00723473	0.00555191	0.094566	0.667031
GO:0043535	regulation of blood vessel endothelial cell migration	6	0.000803859	0.000409225	0.094796	0.667073
GO:0006171	cAMP biosynthetic process	10	0.00120579	0.000678613	0.094846	0.667073
GO:0048593	camera-type eye morphogenesis	24	0.00321543	0.00228408	0.095039	0.667785
GO:2000738	positive regulation of stem cell differentiation	7	0.000803859	0.000398841	0.095206	0.667785
GO:0072332	intrinsic apoptotic signaling pathway by p53 class mediator	26	0.00241158	0.00157806	0.095239	0.667785
GO:2001014	regulation of skeletal muscle cell differentiation	7	0.00120579	0.00072	0.095332	0.667785
GO:1904628	cellular response to phorbol 13-acetate 12-myristate	7	0.000401929	0.000149128	0.095353	0.667785
GO:0071051	polyadenylation-dependent snoRNA 3'-end processing	7	0.000401929	0.000141958	0.095415	0.667785
GO:0050770	regulation of axonogenesis	25	0.00321543	0.00228916	0.095442	0.667785
GO:0045124	regulation of bone resorption	10	0.00120579	0.000701152	0.095473	0.667785
GO:0000076	DNA replication checkpoint	10	0.000803859	0.000374183	0.095552	0.66797
GO:0071044	histone mRNA catabolic process	11	0.00160772	0.00104296	0.09575	0.66818
GO:0034354	'de novo' NAD biosynthetic process from tryptophan	6	0.000401929	0.000141023	0.095795	0.66818
GO:0060732	positive regulation of inositol phosphate biosynthetic process	9	0.000803859	0.000370547	0.09605	0.668875
GO:0016236	macroautophagy	96	0.00763666	0.00602338	0.096511	0.671349
GO:0006937	regulation of muscle contraction	19	0.00120579	0.000669993	0.096614	0.671697
GO:2000300	regulation of synaptic vesicle exocytosis	56	0.00643087	0.00500177	0.096928	0.673512
GO:0035338	long-chain fatty-acyl-CoA biosynthetic process	19	0.00241158	0.00166059	0.097793	0.678039
GO:0072378	blood coagulation, fibrin clot formation	6	0.000803859	0.000384774	0.097857	0.678112
GO:1902966	positive regulation of protein localization to early endosome	9	0.00160772	0.00102229	0.098372	0.680938
GO:0051932	synaptic transmission, GABAergic	14	0.00200965	0.0013519	0.098473	0.681199
GO:0014909	smooth muscle cell migration	7	0.000803859	0.000387691	0.098657	0.68129
GO:0042403	thyroid hormone metabolic process	11	0.000803859	0.00037444	0.098995	0.681518
GO:0048675	axon extension	28	0.00401929	0.00306833	0.099106	0.681562
GO:0051209	release of sequestered calcium ion into cytosol	39	0.00321543	0.0022409	0.09918	0.681701
GO:0045332	phospholipid translocation	26	0.0028135	0.00198815	0.099421	0.682988
GO:0043097	pyrimidine nucleoside salvage	11	0.000803859	0.000387656	0.099639	0.68381
GO:0035335	peptidyl-tyrosine dephosphorylation	103	0.0104502	0.00867425	0.099756	0.68381
GO:0031915	positive regulation of synaptic plasticity	10	0.00120579	0.000680843	0.100005	0.684409
GO:0042730	fibrinolysis	19	0.00120579	0.000645269	0.100108	0.684745
GO:0032802	low-density lipoprotein particle receptor catabolic process	10	0.00120579	0.00066361	0.100389	0.685127
GO:0035093	spermatogenesis, exchange of chromosomal proteins	9	0.000803859	0.000389934	0.100401	0.685127
GO:0009635	response to herbicide	7	0.000401929	0.000146627	0.100472	0.685127
GO:0035855	megakaryocyte development	17	0.00241158	0.00166468	0.100501	0.685127
GO:0055078	sodium ion homeostasis	17	0.00120579	0.00069077	0.100668	0.685127
GO:0003416	endochondral bone growth	10	0.00120579	0.000735739	0.100795	0.685127
GO:0001525	angiogenesis	264	0.0217042	0.0189483	0.100819	0.685127
GO:0051873	killing by host of symbiont cells	10	0.000401929	0.000149053	0.101158	0.686328
GO:0006470	protein dephosphorylation	189	0.0180868	0.0157611	0.101369	0.686775
GO:0055129	L-proline biosynthetic process	7	0.000401929	0.000145808	0.101449	0.686787
GO:0010765	positive regulation of sodium ion transport	16	0.00241158	0.00169956	0.101496	0.686787
GO:0033014	tetrapyrrole biosynthetic process	5	0.000401929	0.000148645	0.101865	0.68792
GO:0086045	membrane depolarization during AV node cell action potential	5	0.000803859	0.0004109	0.101872	0.68792
GO:0006469	negative regulation of protein kinase activity	91	0.00803859	0.00654824	0.101977	0.688263
GO:0050919	negative chemotaxis	40	0.00482315	0.00375917	0.102278	0.688831
GO:0021987	cerebral cortex development	79	0.00803859	0.00659505	0.102386	0.689127
GO:0070106	interleukin-27-mediated signaling pathway	11	0.00120579	0.000682056	0.102514	0.689127
GO:1904385	cellular response to angiotensin	12	0.00120579	0.000699082	0.102611	0.689127
GO:0050860	negative regulation of T cell receptor signaling pathway	25	0.00200965	0.00127216	0.102756	0.689127
GO:0006640	monoacylglycerol biosynthetic process	7	0.000401929	0.000145479	0.102842	0.68934
GO:0150099	neuron-glial cell signaling	5	0.000803859	0.000440206	0.103655	0.692961
GO:0046855	inositol phosphate dephosphorylation	17	0.00200965	0.00134335	0.103843	0.69344
GO:0034137	positive regulation of toll-like receptor 2 signaling pathway	7	0.000803859	0.000412006	0.103945	0.69344
GO:2000042	negative regulation of double-strand break repair via homologous recombination	19	0.00160772	0.000981317	0.104121	0.693885
GO:2000096	positive regulation of Wnt signaling pathway, planar cell polarity pathway	9	0.00120579	0.000704586	0.104503	0.695336
GO:0045954	positive regulation of natural killer cell mediated cytotoxicity	21	0.00160772	0.000950857	0.104601	0.695433
GO:0014910	regulation of smooth muscle cell migration	6	0.000803859	0.000394615	0.104715	0.695654
GO:0042158	lipoprotein biosynthetic process	6	0.000401929	0.000189295	0.104885	0.696055
GO:0036376	sodium ion export across plasma membrane	14	0.00160772	0.0010378	0.105356	0.698279
GO:0071526	semaphorin-plexin signaling pathway	37	0.00442122	0.00331602	0.106101	0.701559
GO:0030853	negative regulation of granulocyte differentiation	7	0.000803859	0.000395345	0.10638	0.702699
GO:0007098	centrosome cycle	44	0.00321543	0.00229907	0.106384	0.702699
GO:0007100	mitotic centrosome separation	6	0.000803859	0.000403006	0.10646	0.702835
GO:0045445	myoblast differentiation	19	0.00241158	0.00172413	0.106601	0.702881
GO:0033634	positive regulation of cell-cell adhesion mediated by integrin	6	0.000401929	0.000152321	0.106604	0.702881
GO:0051561	positive regulation of mitochondrial calcium ion concentration	11	0.00120579	0.00070587	0.106633	0.702881
GO:0030050	vesicle transport along actin filament	18	0.00200965	0.00131155	0.106996	0.704543
GO:0042759	long-chain fatty acid biosynthetic process	26	0.00200965	0.00136359	0.107116	0.704603
GO:0070296	sarcoplasmic reticulum calcium ion transport	5	0.000803859	0.000455647	0.107212	0.704869
GO:0050915	sensory perception of sour taste	5	0.000401929	0.000172237	0.107444	0.70562
GO:0002232	leukocyte chemotaxis involved in inflammatory response	6	0.000401929	0.000152114	0.107468	0.70562
GO:0060373	regulation of ventricular cardiac muscle cell membrane depolarization	8	0.000803859	0.000401552	0.107558	0.70562
GO:0045661	regulation of myoblast differentiation	6	0.000803859	0.000433579	0.107774	0.705642
GO:0035878	nail development	7	0.000803859	0.000406723	0.107909	0.706162
GO:1904153	negative regulation of retrograde protein transport, ER to cytosol	9	0.00120579	0.000720495	0.108046	0.706331
GO:1903238	positive regulation of leukocyte tethering or rolling	9	0.000803859	0.000407828	0.10832	0.707509
GO:0006751	glutathione catabolic process	10	0.000401929	0.000159536	0.108447	0.707509
GO:0006836	neurotransmitter transport	49	0.00442122	0.0033019	0.108449	0.707509
GO:0034241	positive regulation of macrophage fusion	5	0.000401929	0.000188393	0.108633	0.708345
GO:0006000	fructose metabolic process	10	0.000803859	0.000400866	0.108775	0.70882
GO:0006048	UDP-N-acetylglucosamine biosynthetic process	11	0.00120579	0.000680226	0.109148	0.70882
GO:0030913	paranodal junction assembly	7	0.00120579	0.00072095	0.109242	0.70882
GO:0044070	regulation of anion transport	5	0.000803859	0.000413607	0.109247	0.70882
GO:0150079	negative regulation of neuroinflammatory response	12	0.000803859	0.000443702	0.109254	0.70882
GO:0070989	oxidative demethylation	15	0.00160772	0.001087	0.109371	0.70882
GO:0043254	regulation of protein-containing complex assembly	20	0.00200965	0.00133544	0.109377	0.70882
GO:0030522	intracellular receptor signaling pathway	43	0.00522508	0.00413562	0.10981	0.709152
GO:0043923	positive regulation by host of viral transcription	16	0.00200965	0.00135605	0.109832	0.709152
GO:0097264	self proteolysis	7	0.000401929	0.000155397	0.109861	0.709152
GO:0032811	negative regulation of epinephrine secretion	5	0.000401929	0.00015784	0.109911	0.709152
GO:0051597	response to methylmercury	7	0.000803859	0.000403714	0.110638	0.711917
GO:1903896	positive regulation of IRE1-mediated unfolded protein response	8	0.00120579	0.000743511	0.111206	0.714486
GO:0001783	B cell apoptotic process	8	0.00120579	0.000725275	0.11141	0.715089
GO:0001661	conditioned taste aversion	5	0.000803859	0.000439856	0.111477	0.715089
GO:0075044	positive regulation by symbiont of host autophagy	5	0.000803859	0.000431711	0.111654	0.715089
GO:0016310	phosphorylation	702	0.0542605	0.0501499	0.111714	0.715089
GO:0006268	DNA unwinding involved in DNA replication	16	0.00120579	0.000713457	0.111855	0.715089
GO:0007020	microtubule nucleation	20	0.00200965	0.00135694	0.111938	0.715089
GO:0010033	response to organic substance	91	0.00723473	0.00583958	0.111968	0.715089
GO:0008210	estrogen metabolic process	23	0.00160772	0.00099592	0.1122	0.715089
GO:1904754	positive regulation of vascular associated smooth muscle cell migration	26	0.00241158	0.00171801	0.112236	0.715089
GO:0060563	neuroepithelial cell differentiation	9	0.00120579	0.000736288	0.112254	0.715089
GO:0048645	animal organ formation	6	0.000803859	0.000424091	0.112535	0.716142
GO:0002028	regulation of sodium ion transport	19	0.00200965	0.0013322	0.112926	0.717552
GO:0010586	miRNA metabolic process	17	0.00241158	0.0017109	0.113077	0.718152
GO:0014070	response to organic cyclic compound	137	0.0100482	0.00843105	0.113432	0.719328
GO:0043967	histone H4 acetylation	35	0.00361736	0.00265922	0.113548	0.719522
GO:0045141	meiotic telomere clustering	9	0.000803859	0.000412272	0.113576	0.719522
GO:0050996	positive regulation of lipid catabolic process	8	0.000803859	0.00042921	0.11373	0.720139
GO:0044849	estrous cycle	18	0.00200965	0.00137544	0.113916	0.720248
GO:0021680	cerebellar Purkinje cell layer development	13	0.00120579	0.000684075	0.113939	0.720248
GO:0042135	neurotransmitter catabolic process	11	0.000803859	0.000389546	0.113948	0.720248
GO:0070370	cellular heat acclimation	5	0.000401929	0.000165743	0.114037	0.720287
GO:0006518	peptide metabolic process	15	0.00120579	0.000701295	0.114133	0.720535
GO:0001974	blood vessel remodeling	34	0.00361736	0.00276944	0.114218	0.720714
GO:0045008	depyrimidination	8	0.000803859	0.000397543	0.114354	0.721214
GO:0043966	histone H3 acetylation	41	0.00401929	0.00306221	0.114579	0.722274
GO:0032471	negative regulation of endoplasmic reticulum calcium ion concentration	9	0.000803859	0.00039544	0.114732	0.72288
GO:0055123	digestive system development	9	0.000401929	0.000155175	0.115022	0.724234
GO:0033615	mitochondrial proton-transporting ATP synthase complex assembly	6	0.000401929	0.00016196	0.115061	0.724234
GO:0035610	protein side chain deglutamylation	5	0.000401929	0.000164358	0.11524	0.724643
GO:0060765	regulation of androgen receptor signaling pathway	11	0.00120579	0.000728604	0.115345	0.724749
GO:0035332	positive regulation of hippo signaling	5	0.000803859	0.000437108	0.115371	0.724749
GO:0046541	saliva secretion	5	0.000401929	0.000162307	0.115472	0.725025
GO:0022612	gland morphogenesis	8	0.00120579	0.000780286	0.115587	0.725388
GO:0006631	fatty acid metabolic process	194	0.0104502	0.00869572	0.11587	0.726604
GO:1903936	cellular response to sodium arsenite	5	0.000401929	0.000163734	0.115943	0.726604
GO:2001205	negative regulation of osteoclast development	5	0.000803859	0.000471179	0.116325	0.726604
GO:0001836	release of cytochrome c from mitochondria	22	0.00160772	0.000970526	0.116364	0.726604
GO:0060338	regulation of type I interferon-mediated signaling pathway	9	0.000803859	0.000409176	0.116379	0.726604
GO:1902036	regulation of hematopoietic stem cell differentiation	70	0.00482315	0.0037287	0.116559	0.726781
GO:0055075	potassium ion homeostasis	17	0.00160772	0.00103501	0.116786	0.727039
GO:0051896	regulation of protein kinase B signaling	18	0.00200965	0.00144464	0.116823	0.727039
GO:0007585	respiratory gaseous exchange by respiratory system	35	0.00361736	0.00272837	0.117167	0.727952
GO:0060527	prostate epithelial cord arborization involved in prostate glandular acinus morphogenesis	6	0.00120579	0.000778045	0.117199	0.727952
GO:0071038	nuclear polyadenylation-dependent tRNA catabolic process	6	0.000401929	0.000164042	0.11746	0.72886
GO:0071035	nuclear polyadenylation-dependent rRNA catabolic process	6	0.000401929	0.000164042	0.11746	0.72886
GO:0003056	regulation of vascular associated smooth muscle contraction	5	0.000803859	0.000506009	0.117597	0.729346
GO:0001659	temperature homeostasis	21	0.00200965	0.00135202	0.11769	0.729346
GO:0016579	protein deubiquitination	271	0.0200965	0.0176831	0.117736	0.729346
GO:0006044	N-acetylglucosamine metabolic process	17	0.00160772	0.000957737	0.117768	0.729346
GO:0070544	histone H3-K36 demethylation	10	0.00160772	0.00108423	0.117976	0.729923
GO:2001234	negative regulation of apoptotic signaling pathway	33	0.0028135	0.00200313	0.118248	0.730631
GO:0060670	branching involved in labyrinthine layer morphogenesis	9	0.00120579	0.000737455	0.118325	0.730658
GO:0071340	skeletal muscle acetylcholine-gated channel clustering	8	0.000803859	0.000413919	0.11857	0.731815
GO:0006121	mitochondrial electron transport, succinate to ubiquinone	5	0.000401929	0.000168798	0.119052	0.733721
GO:0060976	coronary vasculature development	28	0.00321543	0.00234982	0.119147	0.73395
GO:0030889	negative regulation of B cell proliferation	18	0.00160772	0.00107153	0.119414	0.735238
GO:0008053	mitochondrial fusion	16	0.00160772	0.00101833	0.119776	0.736753
GO:0072177	mesonephric duct development	6	0.000803859	0.000430983	0.119895	0.737128
GO:1901166	neural crest cell migration involved in autonomic nervous system development	6	0.00120579	0.000750105	0.120097	0.737133
GO:1902953	positive regulation of ER to Golgi vesicle-mediated transport	5	0.000803859	0.000441067	0.120128	0.737133
GO:0072284	metanephric S-shaped body morphogenesis	5	0.000803859	0.000430698	0.120314	0.737739
GO:0001963	synaptic transmission, dopaminergic	14	0.000803859	0.00040069	0.120546	0.737761
GO:0090026	positive regulation of monocyte chemotaxis	19	0.00120579	0.000717926	0.120675	0.737761
GO:0099590	neurotransmitter receptor internalization	8	0.000803859	0.000420161	0.120753	0.737761
GO:0001953	negative regulation of cell-matrix adhesion	22	0.0028135	0.00213373	0.120971	0.738436
GO:0021542	dentate gyrus development	16	0.0028135	0.00215402	0.121151	0.738654
GO:0010225	response to UV-C	10	0.00120579	0.000731659	0.121423	0.738765
GO:0036297	interstrand cross-link repair	54	0.0028135	0.00196444	0.12143	0.738765
GO:0002250	adaptive immune response	466	0.00884244	0.0071736	0.121527	0.738765
GO:1902430	negative regulation of amyloid-beta formation	27	0.00160772	0.00108482	0.121674	0.738765
GO:0034727	piecemeal microautophagy of the nucleus	5	0.000803859	0.000447545	0.121927	0.738765
GO:0048680	positive regulation of axon regeneration	10	0.000803859	0.000420073	0.121943	0.738765
GO:0071221	cellular response to bacterial lipopeptide	8	0.000401929	0.000171622	0.12203	0.738765
GO:0015807	L-amino acid transport	5	0.000803859	0.000409861	0.122051	0.738765
GO:0007229	integrin-mediated signaling pathway	101	0.00803859	0.00667814	0.122173	0.738765
GO:0010594	regulation of endothelial cell migration	9	0.00120579	0.000715802	0.122195	0.738765
GO:0019941	modification-dependent protein catabolic process	10	0.000401929	0.000173424	0.122351	0.738993
GO:0006497	protein lipidation	12	0.00120579	0.000727061	0.122722	0.740317
GO:0032924	activin receptor signaling pathway	19	0.0028135	0.00213153	0.122745	0.740317
GO:0031223	auditory behavior	6	0.000803859	0.000428906	0.122996	0.740543
GO:0035194	post-transcriptional gene silencing by RNA	10	0.00200965	0.00145873	0.123016	0.740543
GO:0035249	synaptic transmission, glutamatergic	30	0.00321543	0.00237701	0.123074	0.740543
GO:0048006	antigen processing and presentation, endogenous lipid antigen via MHC class Ib	5	0.000401929	0.000171304	0.123465	0.741906
GO:1904707	positive regulation of vascular associated smooth muscle cell proliferation	49	0.00401929	0.00315503	0.123844	0.741906
GO:0060044	negative regulation of cardiac muscle cell proliferation	23	0.00241158	0.0017509	0.123898	0.741906
GO:0042167	heme catabolic process	7	0.000401929	0.000133917	0.123989	0.741906
GO:0035265	organ growth	12	0.00200965	0.0014484	0.124094	0.741906
GO:0000083	regulation of transcription involved in G1/S transition of mitotic cell cycle	29	0.0028135	0.00203205	0.124162	0.741906
GO:0045879	negative regulation of smoothened signaling pathway	29	0.0028135	0.00205879	0.1243	0.741906
GO:1902109	negative regulation of mitochondrial membrane permeability involved in apoptotic process	5	0.000401929	0.000197458	0.124341	0.741906
GO:0051262	protein tetramerization	22	0.00241158	0.00174223	0.124361	0.741906
GO:0097021	lymphocyte migration into lymphoid organs	5	0.000401929	0.000175723	0.12438	0.741906
GO:0021772	olfactory bulb development	22	0.00241158	0.00170914	0.124445	0.741906
GO:0006884	cell volume homeostasis	21	0.00200965	0.00137607	0.124455	0.741906
GO:0097237	cellular response to toxic substance	6	0.000803859	0.000463558	0.124514	0.741906
GO:0051967	negative regulation of synaptic transmission, glutamatergic	10	0.00120579	0.000743299	0.12458	0.741906
GO:0070757	interleukin-35-mediated signaling pathway	11	0.00120579	0.000719373	0.124726	0.742047
GO:0046485	ether lipid metabolic process	5	0.000401929	0.000182366	0.125483	0.745166
GO:0072384	organelle transport along microtubule	6	0.000803859	0.000442886	0.125954	0.746146
GO:0030035	microspike assembly	5	0.000803859	0.000471	0.125973	0.746146
GO:0031648	protein destabilization	51	0.00482315	0.00378309	0.126113	0.746146
GO:0018298	protein-chromophore linkage	15	0.000803859	0.000421793	0.126371	0.746588
GO:0031529	ruffle organization	14	0.00120579	0.000732991	0.126494	0.746967
GO:1902475	L-alpha-amino acid transmembrane transport	16	0.00120579	0.000723402	0.126893	0.74828
GO:0032613	interleukin-10 production	5	0.000401929	0.000164848	0.127066	0.748952
GO:0031018	endocrine pancreas development	27	0.0028135	0.00209416	0.127289	0.749547
GO:0050796	regulation of insulin secretion	74	0.00643087	0.00525383	0.127409	0.749547
GO:0045822	negative regulation of heart contraction	8	0.00120579	0.000799788	0.127452	0.749547
GO:0007597	blood coagulation, intrinsic pathway	17	0.000803859	0.000401597	0.127462	0.749547
GO:2000767	positive regulation of cytoplasmic translation	8	0.000803859	0.000433767	0.127527	0.749583
GO:0046007	negative regulation of activated T cell proliferation	17	0.00160772	0.00106399	0.12787	0.751144
GO:0050727	regulation of inflammatory response	97	0.00562701	0.00450676	0.128098	0.751548
GO:0032963	collagen metabolic process	14	0.00120579	0.000722147	0.128375	0.752478
GO:0045842	positive regulation of mitotic metaphase/anaphase transition	12	0.00120579	0.000756837	0.128523	0.752998
GO:0050795	regulation of behavior	8	0.000803859	0.000439498	0.128593	0.753061
GO:0003357	noradrenergic neuron differentiation	5	0.000803859	0.000406519	0.129501	0.756627
GO:0001558	regulation of cell growth	75	0.00602894	0.00481817	0.129509	0.756627
GO:0046415	urate metabolic process	10	0.000803859	0.000433742	0.129821	0.757458
GO:0006590	thyroid hormone generation	17	0.00120579	0.000719256	0.129917	0.757486
GO:0051571	positive regulation of histone H3-K4 methylation	17	0.00200965	0.00138752	0.129945	0.757486
GO:0036499	PERK-mediated unfolded protein response	13	0.00120579	0.000697631	0.130364	0.759231
GO:2000650	negative regulation of sodium ion transmembrane transporter activity	9	0.00160772	0.00110386	0.130609	0.76031
GO:0045926	negative regulation of growth	19	0.00120579	0.000717185	0.130693	0.76045
GO:0006685	sphingomyelin catabolic process	7	0.000401929	0.000191095	0.130863	0.760742
GO:1903288	positive regulation of potassium ion import across plasma membrane	7	0.00120579	0.000796658	0.131105	0.761284
GO:0001934	positive regulation of protein phosphorylation	212	0.0156752	0.013699	0.131122	0.761284
GO:0044206	UMP salvage	5	0.000401929	0.000187221	0.131136	0.761284
GO:0046850	regulation of bone remodeling	6	0.000803859	0.000450994	0.131309	0.761461
GO:2001054	negative regulation of mesenchymal cell apoptotic process	6	0.000803859	0.000465326	0.131346	0.761461
GO:0006939	smooth muscle contraction	18	0.00200965	0.00140871	0.131379	0.761461
GO:0003009	skeletal muscle contraction	27	0.00160772	0.00110982	0.131534	0.761461
GO:0140115	export across plasma membrane	10	0.00120579	0.000758396	0.131556	0.761461
GO:0033153	T cell receptor V(D)J recombination	5	0.000803859	0.000478916	0.131944	0.76249
GO:0050673	epithelial cell proliferation	14	0.00160772	0.00106993	0.13228	0.764084
GO:0072657	protein localization to membrane	23	0.00200965	0.00140861	0.132916	0.767409
GO:0098700	neurotransmitter loading into synaptic vesicle	5	0.000803859	0.000457424	0.133221	0.76882
GO:0060023	soft palate development	5	0.000803859	0.000468302	0.133527	0.769886
GO:0051928	positive regulation of calcium ion transport	28	0.00241158	0.00177699	0.133762	0.770126
GO:0062009	secondary palate development	14	0.00200965	0.0014237	0.134119	0.77072
GO:0043406	positive regulation of MAP kinase activity	61	0.00562701	0.00454987	0.134128	0.77072
GO:0050885	neuromuscular process controlling balance	50	0.00482315	0.00388652	0.134256	0.77072
GO:0007154	cell communication	47	0.00361736	0.00273635	0.134326	0.77072
GO:0071704	organic substance metabolic process	5	0.000803859	0.000454417	0.134573	0.77072
GO:0031665	negative regulation of lipopolysaccharide-mediated signaling pathway	11	0.000401929	0.00016965	0.134841	0.77072
GO:0010820	positive regulation of T cell chemotaxis	16	0.00160772	0.00109718	0.135024	0.77072
GO:0033129	positive regulation of histone phosphorylation	8	0.00120579	0.00078916	0.135108	0.77072
GO:0090344	negative regulation of cell aging	6	0.000803859	0.000473777	0.135191	0.77072
GO:0097035	regulation of membrane lipid distribution	5	0.000401929	0.00016424	0.135227	0.77072
GO:0071870	cellular response to catecholamine stimulus	7	0.00120579	0.00078742	0.135313	0.77072
GO:0050953	sensory perception of light stimulus	13	0.00120579	0.000712949	0.135447	0.77072
GO:0061157	mRNA destabilization	17	0.0028135	0.00217274	0.135537	0.77072
GO:0006817	phosphate ion transport	11	0.00120579	0.000749618	0.135765	0.77072
GO:0046655	folic acid metabolic process	18	0.00120579	0.000704637	0.135821	0.77072
GO:0032836	glomerular basement membrane development	10	0.00120579	0.000743227	0.135856	0.77072
GO:1902459	positive regulation of stem cell population maintenance	7	0.00120579	0.00077107	0.136079	0.771009
GO:0007214	gamma-aminobutyric acid signaling pathway	29	0.00361736	0.0028189	0.136089	0.771009
GO:0070327	thyroid hormone transport	10	0.000803859	0.000441124	0.136429	0.771903
GO:0055072	iron ion homeostasis	37	0.0028135	0.00206234	0.136686	0.772777
GO:0051017	actin filament bundle assembly	35	0.0028135	0.00203223	0.136793	0.772777
GO:1900272	negative regulation of long-term synaptic potentiation	13	0.00120579	0.000779936	0.136827	0.772777
GO:0019363	pyridine nucleotide biosynthetic process	12	0.000803859	0.000468499	0.137175	0.773352
GO:0016571	histone methylation	24	0.0028135	0.00215465	0.137191	0.773352
GO:0006636	unsaturated fatty acid biosynthetic process	14	0.00160772	0.0010755	0.137199	0.773352
GO:0016050	vesicle organization	14	0.00200965	0.00143731	0.137214	0.773352
GO:0060371	regulation of atrial cardiac muscle cell membrane depolarization	9	0.000803859	0.000447518	0.137244	0.773352
GO:0035973	aggrephagy	6	0.000803859	0.0004874	0.137294	0.773352
GO:0009249	protein lipoylation	6	0.000401929	0.000183675	0.137541	0.773664
GO:0097340	inhibition of cysteine-type endopeptidase activity	5	0.000401929	0.000193485	0.137626	0.773664
GO:0099504	synaptic vesicle cycle	5	0.000803859	0.000509051	0.137654	0.773664
GO:0072201	negative regulation of mesenchymal cell proliferation	6	0.000803859	0.000447932	0.137741	0.773811
GO:1905907	negative regulation of amyloid fibril formation	6	0.000401929	0.000195137	0.137927	0.773998
GO:0030857	negative regulation of epithelial cell differentiation	13	0.00160772	0.00110006	0.138005	0.773998
GO:0046856	phosphatidylinositol dephosphorylation	31	0.00321543	0.00244411	0.138018	0.773998
GO:0030104	water homeostasis	6	0.000803859	0.000482153	0.138253	0.774956
GO:0033132	negative regulation of glucokinase activity	5	0.000401929	0.000185602	0.138311	0.774956
GO:0001881	receptor recycling	11	0.00120579	0.000758277	0.138376	0.774979
GO:0085020	protein K6-linked ubiquitination	9	0.000803859	0.000449042	0.138439	0.77499
GO:0001757	somite specification	5	0.000803859	0.000457269	0.138515	0.775074
GO:0090656	t-circle formation	12	0.000803859	0.00042628	0.138837	0.776533
GO:0018126	protein hydroxylation	5	0.000401929	0.000203106	0.139355	0.777514
GO:0086005	ventricular cardiac muscle cell action potential	18	0.00160772	0.00107125	0.139467	0.777514
GO:1904781	positive regulation of protein localization to centrosome	7	0.000803859	0.000476117	0.139684	0.777514
GO:0086015	SA node cell action potential	6	0.000803859	0.000438968	0.139776	0.777514
GO:0010543	regulation of platelet activation	5	0.000401929	0.000180534	0.139799	0.777514
GO:2000318	positive regulation of T-helper 17 type immune response	7	0.000401929	0.000177557	0.139832	0.777514
GO:0014002	astrocyte development	18	0.00200965	0.00147665	0.139924	0.777514
GO:0040008	regulation of growth	79	0.00723473	0.00597293	0.140005	0.777514
GO:0046689	response to mercury ion	7	0.000401929	0.000182566	0.140134	0.777514
GO:0009060	aerobic respiration	33	0.00120579	0.000722058	0.140156	0.777514
GO:2000347	positive regulation of hepatocyte proliferation	10	0.00120579	0.000749078	0.140162	0.777514
GO:0002544	chronic inflammatory response	9	0.000803859	0.000441471	0.140186	0.777514
GO:0060351	cartilage development involved in endochondral bone morphogenesis	7	0.000803859	0.000432799	0.140358	0.777514
GO:0055074	calcium ion homeostasis	29	0.0028135	0.00210844	0.140373	0.777514
GO:0046697	decidualization	27	0.00241158	0.00173884	0.140457	0.777514
GO:0051923	sulfation	12	0.000803859	0.000432771	0.140469	0.777514
GO:0003198	epithelial to mesenchymal transition involved in endocardial cushion formation	12	0.00160772	0.00110844	0.140644	0.777514
GO:0006851	mitochondrial calcium ion transmembrane transport	23	0.00160772	0.00106054	0.140901	0.777791
GO:0050891	multicellular organismal water homeostasis	11	0.000803859	0.000447051	0.140905	0.777791
GO:0007143	female meiotic nuclear division	11	0.00120579	0.00075538	0.140947	0.777791
GO:0001944	vasculature development	29	0.00321543	0.00249159	0.14096	0.777791
GO:0030279	negative regulation of ossification	23	0.0028135	0.00212712	0.141083	0.778131
GO:0043320	natural killer cell degranulation	5	0.000401929	0.000187412	0.14122	0.778549
GO:1902817	negative regulation of protein localization to microtubule	5	0.000803859	0.000447797	0.141309	0.778701
GO:0032607	interferon-alpha production	5	0.000401929	0.000190441	0.14139	0.77881
GO:0097250	mitochondrial respirasome assembly	8	0.000401929	0.000189469	0.141614	0.77903
GO:0071864	positive regulation of cell proliferation in bone marrow	8	0.00120579	0.000802177	0.142019	0.780245
GO:0061073	ciliary body morphogenesis	5	0.000803859	0.000496174	0.142781	0.783414
GO:0033631	cell-cell adhesion mediated by integrin	6	0.00120579	0.000778047	0.142872	0.783575
GO:0006089	lactate metabolic process	5	0.000803859	0.000474254	0.142934	0.783577
GO:0021960	anterior commissure morphogenesis	5	0.00120579	0.000845039	0.143092	0.783834
GO:1902166	negative regulation of intrinsic apoptotic signaling pathway in response to DNA damage by p53 class mediator	16	0.00160772	0.00108291	0.143105	0.783834
GO:0060385	axonogenesis involved in innervation	6	0.00120579	0.000808394	0.143166	0.783834
GO:0045671	negative regulation of osteoclast differentiation	26	0.00241158	0.00176049	0.143441	0.784663
GO:0042118	endothelial cell activation	11	0.00160772	0.00113035	0.143538	0.784856
GO:0043615	astrocyte cell migration	6	0.000401929	0.000195399	0.143606	0.78489
GO:1902065	response to L-glutamate	6	0.000803859	0.000506816	0.143675	0.784929
GO:1904447	folate import across plasma membrane	5	0.000401929	0.000234862	0.144314	0.787404
GO:0034134	toll-like receptor 2 signaling pathway	5	0.000401929	0.000192034	0.144378	0.787415
GO:0043968	histone H2A acetylation	15	0.00160772	0.00106616	0.144562	0.78808
GO:0043537	negative regulation of blood vessel endothelial cell migration	43	0.00241158	0.00182695	0.14495	0.789509
GO:0060402	calcium ion transport into cytosol	14	0.00200965	0.00143912	0.145126	0.789509
GO:0006090	pyruvate metabolic process	24	0.00160772	0.00105006	0.145145	0.789509
GO:0098742	cell-cell adhesion via plasma-membrane adhesion molecules	38	0.00361736	0.00277101	0.145878	0.792872
GO:1901029	negative regulation of mitochondrial outer membrane permeabilization involved in apoptotic signaling pathway	9	0.000803859	0.000434882	0.146319	0.79425
GO:0007626	locomotory behavior	96	0.00884244	0.0075532	0.146735	0.795827
GO:2000543	positive regulation of gastrulation	7	0.000803859	0.000460552	0.146991	0.796468
GO:0015012	heparan sulfate proteoglycan biosynthetic process	18	0.00200965	0.00145183	0.147035	0.796468
GO:0051568	histone H3-K4 methylation	24	0.00241158	0.00180266	0.147104	0.796468
GO:0032873	negative regulation of stress-activated MAPK cascade	9	0.000803859	0.000479489	0.147224	0.796779
GO:0033005	positive regulation of mast cell activation	5	0.000401929	0.000194352	0.147355	0.796906
GO:0034154	toll-like receptor 7 signaling pathway	5	0.000401929	0.000184657	0.147443	0.796945
GO:0007200	phospholipase C-activating G protein-coupled receptor signaling pathway	64	0.00401929	0.00310732	0.147617	0.797207
GO:0070831	basement membrane assembly	10	0.000803859	0.000460568	0.147858	0.79783
GO:0060291	long-term synaptic potentiation	49	0.00522508	0.00421963	0.148054	0.79821
GO:0010829	negative regulation of glucose transmembrane transport	5	0.000401929	0.000210272	0.148363	0.798611
GO:1901016	regulation of potassium ion transmembrane transporter activity	7	0.00120579	0.000791452	0.14838	0.798611
GO:0048598	embryonic morphogenesis	22	0.00321543	0.00250195	0.148748	0.800108
GO:0034058	endosomal vesicle fusion	8	0.000803859	0.000447	0.148908	0.800436
GO:0001776	leukocyte homeostasis	6	0.000803859	0.000474379	0.149078	0.800672
GO:0051006	positive regulation of lipoprotein lipase activity	11	0.000401929	0.000218609	0.149697	0.801156
GO:0048806	genitalia development	10	0.00120579	0.000757718	0.14975	0.801156
GO:0051782	negative regulation of cell division	9	0.000803859	0.000473512	0.149795	0.801156
GO:0070317	negative regulation of G0 to G1 transition	41	0.00442122	0.00356216	0.149815	0.801156
GO:0046676	negative regulation of insulin secretion	31	0.0028135	0.00215799	0.149946	0.801203
GO:0034475	U4 snRNA 3'-end processing	8	0.000401929	0.000191349	0.149997	0.801203
GO:0003073	regulation of systemic arterial blood pressure	15	0.00120579	0.000743864	0.150425	0.803049
GO:0021794	thalamus development	13	0.00120579	0.000786199	0.150611	0.80347
GO:0030854	positive regulation of granulocyte differentiation	6	0.000401929	0.000202624	0.150752	0.803884
GO:0045059	positive thymic T cell selection	11	0.000803859	0.000459974	0.150897	0.803982
GO:0006629	lipid metabolic process	605	0.0309486	0.0284503	0.151513	0.80625
GO:0019373	epoxygenase P450 pathway	20	0.000803859	0.000420753	0.151632	0.806545
GO:0034773	histone H4-K20 trimethylation	6	0.00120579	0.000841549	0.151821	0.80713
GO:0097421	liver regeneration	34	0.0028135	0.00207828	0.151869	0.80713
GO:0071702	organic substance transport	6	0.000401929	0.000270364	0.152065	0.807833
GO:0060718	chorionic trophoblast cell differentiation	5	0.000803859	0.000479846	0.152584	0.809913
GO:0030100	regulation of endocytosis	35	0.00321543	0.00246245	0.152727	0.810191
GO:0006267	pre-replicative complex assembly involved in nuclear cell cycle DNA replication	8	0.000401929	0.000190745	0.152764	0.810191
GO:0003197	endocardial cushion development	11	0.00160772	0.00111164	0.15289	0.810521
GO:0006378	mRNA polyadenylation	37	0.00321543	0.00249306	0.154008	0.815427
GO:0070474	positive regulation of uterine smooth muscle contraction	8	0.000401929	0.000192224	0.154197	0.81553
GO:0021799	cerebral cortex radially oriented cell migration	12	0.00200965	0.00148181	0.154205	0.81553
GO:0045745	positive regulation of G protein-coupled receptor signaling pathway	14	0.000803859	0.000475496	0.15422	0.81553
GO:0031622	positive regulation of fever generation	5	0.000803859	0.000482662	0.154287	0.815545
GO:0007605	sensory perception of sound	155	0.011254	0.00986054	0.154621	0.816073
GO:1900744	regulation of p38MAPK cascade	7	0.000803859	0.000470996	0.154634	0.816073
GO:1902108	regulation of mitochondrial membrane permeability involved in apoptotic process	6	0.000401929	0.000190685	0.154644	0.816073
GO:0060218	hematopoietic stem cell differentiation	16	0.00160772	0.00113565	0.154743	0.816122
GO:0007032	endosome organization	38	0.00361736	0.00282838	0.154846	0.816122
GO:0042417	dopamine metabolic process	16	0.00120579	0.00077403	0.154941	0.816236
GO:0009584	detection of visible light	14	0.000803859	0.000450434	0.155113	0.816236
GO:0031468	nuclear envelope reassembly	8	0.000803859	0.000471511	0.155148	0.816236
GO:0009653	anatomical structure morphogenesis	137	0.0096463	0.00827868	0.155189	0.816236
GO:0007420	brain development	279	0.0245177	0.0223332	0.155328	0.816629
GO:1900407	regulation of cellular response to oxidative stress	8	0.000803859	0.000498204	0.155535	0.817225
GO:0022010	central nervous system myelination	14	0.00160772	0.00110046	0.155781	0.817689
GO:0071459	protein localization to chromosome, centromeric region	6	0.000803859	0.000468637	0.155891	0.817897
GO:0007224	smoothened signaling pathway	71	0.00522508	0.0042384	0.156105	0.818343
GO:0006924	activation-induced cell death of T cells	6	0.000401929	0.00019706	0.156178	0.818388
GO:0032020	ISG15-protein conjugation	6	0.000401929	0.000198641	0.156562	0.819949
GO:0007178	transmembrane receptor protein serine/threonine kinase signaling pathway	18	0.0028135	0.00222431	0.156605	0.819949
GO:0002933	lipid hydroxylation	7	0.000401929	0.000197759	0.157241	0.821412
GO:0031295	T cell costimulation	54	0.00442122	0.00352937	0.157332	0.821412
GO:1902476	chloride transmembrane transport	96	0.00723473	0.00614379	0.157657	0.822584
GO:0000915	actomyosin contractile ring assembly	5	0.000803859	0.00045617	0.157911	0.823055
GO:0001844	protein insertion into mitochondrial membrane involved in apoptotic signaling pathway	7	0.000803859	0.000480383	0.158161	0.82402
GO:0050877	nervous system process	57	0.00361736	0.00285594	0.158331	0.82423
GO:0043401	steroid hormone mediated signaling pathway	24	0.0028135	0.00216983	0.158564	0.825104
GO:2000556	positive regulation of T-helper 1 cell cytokine production	5	0.000401929	0.000198095	0.158989	0.826977
GO:0044791	positive regulation by host of viral release from host cell	5	0.000803859	0.000498787	0.15919	0.8276
GO:0031175	neuron projection development	142	0.0136656	0.0120988	0.159239	0.8276
GO:0006102	isocitrate metabolic process	6	0.000401929	0.000205223	0.159779	0.829049
GO:0045920	negative regulation of exocytosis	5	0.000401929	0.000207571	0.160029	0.829683
GO:0043588	skin development	47	0.00401929	0.00316326	0.160062	0.829683
GO:1905618	positive regulation of miRNA mediated inhibition of translation	7	0.00120579	0.000855764	0.160097	0.829683
GO:1900034	regulation of cellular response to heat	77	0.00602894	0.00494207	0.160631	0.831242
GO:0015670	carbon dioxide transport	5	0.000401929	0.000202369	0.160855	0.831242
GO:0032418	lysosome localization	28	0.00241158	0.00179705	0.160856	0.831242
GO:0021861	forebrain radial glial cell differentiation	7	0.000803859	0.000471976	0.160935	0.831253
GO:0010614	negative regulation of cardiac muscle hypertrophy	19	0.00120579	0.000805005	0.160989	0.831253
GO:0032024	positive regulation of insulin secretion	47	0.00361736	0.00282748	0.161208	0.831421
GO:0021853	cerebral cortex GABAergic interneuron migration	6	0.000803859	0.000469997	0.161218	0.831421
GO:0022008	neurogenesis	61	0.00562701	0.00468129	0.161556	0.832556
GO:0032354	response to follicle-stimulating hormone	5	0.000803859	0.000515487	0.16177	0.832894
GO:2000304	positive regulation of ceramide biosynthetic process	12	0.000803859	0.000454214	0.161791	0.832894
GO:1903588	negative regulation of blood vessel endothelial cell proliferation involved in sprouting angiogenesis	29	0.000803859	0.000455722	0.161892	0.832894
GO:0010881	regulation of cardiac muscle contraction by regulation of the release of sequestered calcium ion	25	0.00241158	0.0018356	0.161897	0.832894
GO:0034499	late endosome to Golgi transport	6	0.000803859	0.000471612	0.162239	0.834127
GO:0045732	positive regulation of protein catabolic process	77	0.00723473	0.00617699	0.162268	0.834127
GO:0033273	response to vitamin	5	0.000401929	0.000204113	0.162923	0.836842
GO:0000729	DNA double-strand break processing	15	0.00160772	0.00110905	0.162928	0.836842
GO:0045329	carnitine biosynthetic process	5	0.000401929	0.000200706	0.163039	0.837059
GO:0060315	negative regulation of ryanodine-sensitive calcium-release channel activity	11	0.00120579	0.000806591	0.163102	0.837059
GO:0051583	dopamine uptake involved in synaptic transmission	5	0.000401929	0.000199361	0.163442	0.838137
GO:0010880	regulation of release of sequestered calcium ion into cytosol by sarcoplasmic reticulum	23	0.00241158	0.00187311	0.163444	0.838137
GO:0044314	protein K27-linked ubiquitination	5	0.000401929	0.000230423	0.163673	0.838578
GO:0045721	negative regulation of gluconeogenesis	17	0.00160772	0.00116434	0.163699	0.838578
GO:0002064	epithelial cell development	12	0.00160772	0.0011737	0.164032	0.83912
GO:0030879	mammary gland development	34	0.00361736	0.00287847	0.164145	0.83936
GO:0009308	amine metabolic process	9	0.000401929	0.000201822	0.164633	0.841178
GO:0051490	negative regulation of filopodium assembly	5	0.000803859	0.000513183	0.164826	0.841379
GO:0032793	positive regulation of CREB transcription factor activity	19	0.00241158	0.00186481	0.164859	0.841379
GO:0090051	negative regulation of cell migration involved in sprouting angiogenesis	50	0.00200965	0.00148136	0.164871	0.841379
GO:0001942	hair follicle development	41	0.00401929	0.00324821	0.165249	0.842631
GO:0031098	stress-activated protein kinase signaling cascade	20	0.0028135	0.00221385	0.165373	0.842924
GO:0048525	negative regulation of viral process	6	0.000401929	0.000210198	0.165482	0.843142
GO:0042771	intrinsic apoptotic signaling pathway in response to DNA damage by p53 class mediator	30	0.0028135	0.00218956	0.166168	0.845935
GO:0042060	wound healing	108	0.00924437	0.00799439	0.16623	0.845935
GO:0010828	positive regulation of glucose transmembrane transport	7	0.000803859	0.000516991	0.16659	0.847088
GO:0030578	PML body organization	6	0.00120579	0.00083752	0.16708	0.848221
GO:0007608	sensory perception of smell	420	0.0028135	0.00213875	0.167562	0.849195
GO:0060662	salivary gland cavitation	5	0.000803859	0.000527031	0.167606	0.849195
GO:0001921	positive regulation of receptor recycling	14	0.00120579	0.000791919	0.168067	0.850721
GO:2001223	negative regulation of neuron migration	13	0.00160772	0.00119484	0.168214	0.850721
GO:0007197	adenylate cyclase-inhibiting G protein-coupled acetylcholine receptor signaling pathway	8	0.000803859	0.000502249	0.168243	0.850721
GO:0070212	protein poly-ADP-ribosylation	8	0.000803859	0.000493615	0.168301	0.850721
GO:0033169	histone H3-K9 demethylation	15	0.00160772	0.00116431	0.168395	0.850721
GO:0021544	subpallium development	5	0.000401929	0.000208901	0.168968	0.853033
GO:0030728	ovulation	11	0.00120579	0.000768121	0.16951	0.85509
GO:0051101	regulation of DNA binding	7	0.000401929	0.000212857	0.16982	0.855453
GO:0006265	DNA topological change	9	0.000803859	0.000459698	0.169894	0.855453
GO:0034109	homotypic cell-cell adhesion	9	0.00120579	0.000820878	0.169953	0.855453
GO:0008610	lipid biosynthetic process	22	0.00241158	0.0018489	0.169985	0.855453
GO:0032230	positive regulation of synaptic transmission, GABAergic	15	0.00160772	0.00114761	0.169986	0.855453
GO:0071318	cellular response to ATP	18	0.00120579	0.000772322	0.170214	0.855777
GO:0016226	iron-sulfur cluster assembly	22	0.00120579	0.000780843	0.170268	0.855777
GO:0051926	negative regulation of calcium ion transport	15	0.00120579	0.000781248	0.170542	0.856554
GO:2001044	regulation of integrin-mediated signaling pathway	5	0.000401929	0.000213354	0.171328	0.860161
GO:0006686	sphingomyelin biosynthetic process	7	0.00120579	0.0008542	0.17143	0.860333
GO:1903364	positive regulation of cellular protein catabolic process	14	0.00160772	0.0011424	0.171636	0.860705
GO:0006710	androgen catabolic process	5	0.000401929	0.000212143	0.171722	0.860705
GO:0030007	cellular potassium ion homeostasis	14	0.00160772	0.00116542	0.171775	0.860705
GO:0060259	regulation of feeding behavior	11	0.000803859	0.000495982	0.172128	0.861944
GO:0002024	diet induced thermogenesis	12	0.000803859	0.000492905	0.172332	0.862135
GO:1904355	positive regulation of telomere capping	17	0.00160772	0.00116173	0.172425	0.862196
GO:0017196	N-terminal peptidyl-methionine acetylation	7	0.00120579	0.000847905	0.17248	0.862196
GO:0061817	endoplasmic reticulum-plasma membrane tethering	6	0.000803859	0.000492865	0.172771	0.862393
GO:0007519	skeletal muscle tissue development	57	0.00562701	0.00479879	0.172811	0.862393
GO:0045588	positive regulation of gamma-delta T cell differentiation	7	0.000803859	0.000485361	0.172826	0.862393
GO:1900119	positive regulation of execution phase of apoptosis	9	0.000803859	0.000491	0.172844	0.862393
GO:0060428	lung epithelium development	8	0.000803859	0.000536573	0.172945	0.862393
GO:0016045	detection of bacterium	12	0.000401929	0.000206374	0.173145	0.862393
GO:0006734	"NADH metabolic process"	11	0.000803859	0.000479168	0.173241	0.862393
GO:0007216	G protein-coupled glutamate receptor signaling pathway	17	0.00200965	0.00151452	0.173343	0.862393
GO:0072734	cellular response to staurosporine	5	0.000401929	0.000219665	0.17338	0.862393
GO:0046784	viral mRNA export from host cell nucleus	7	0.000401929	0.00021192	0.173402	0.862393
GO:0017145	stem cell division	8	0.00120579	0.000843462	0.173484	0.862463
GO:0008628	hormone-mediated apoptotic signaling pathway	5	0.000401929	0.000196023	0.173612	0.862762
GO:0043276	anoikis	11	0.00120579	0.000820418	0.173722	0.862897
GO:0030837	negative regulation of actin filament polymerization	21	0.00200965	0.00149833	0.173881	0.862897
GO:0033137	negative regulation of peptidyl-serine phosphorylation	28	0.0028135	0.00220558	0.173911	0.862897
GO:0043691	reverse cholesterol transport	18	0.000803859	0.00050026	0.174208	0.863013
GO:0010706	ganglioside biosynthetic process via lactosylceramide	5	0.000803859	0.00050808	0.174218	0.863013
GO:0045722	positive regulation of gluconeogenesis	17	0.00200965	0.00152338	0.174342	0.863013
GO:1901385	regulation of voltage-gated calcium channel activity	8	0.00120579	0.000849047	0.174558	0.86341
GO:0060316	positive regulation of ryanodine-sensitive calcium-release channel activity	9	0.00120579	0.000852431	0.17495	0.864675
GO:0060644	mammary gland epithelial cell differentiation	13	0.00160772	0.0011712	0.175212	0.865633
GO:1903599	positive regulation of autophagy of mitochondrion	7	0.000803859	0.00051341	0.175514	0.866115
GO:0000320	re-entry into mitotic cell cycle	6	0.000401929	0.000211023	0.176071	0.868526
GO:0045778	positive regulation of ossification	17	0.00200965	0.00149264	0.176649	0.870585
GO:0042310	vasoconstriction	17	0.00120579	0.000795917	0.176694	0.870585
GO:0035754	B cell chemotaxis	6	0.000401929	0.000215136	0.177039	0.871608
GO:1900087	positive regulation of G1/S transition of mitotic cell cycle	41	0.00321543	0.00257587	0.177325	0.872002
GO:0032374	regulation of cholesterol transport	5	0.000401929	0.000241085	0.17742	0.872013
GO:0008652	cellular amino acid biosynthetic process	45	0.0028135	0.00212172	0.177543	0.872013
GO:1900121	negative regulation of receptor binding	9	0.000803859	0.000514389	0.17757	0.872013
GO:0000956	nuclear-transcribed mRNA catabolic process	19	0.00160772	0.0012198	0.177739	0.872013
GO:0015701	bicarbonate transport	42	0.0028135	0.00218771	0.177998	0.872946
GO:0034641	cellular nitrogen compound metabolic process	9	0.000401929	0.000216988	0.178282	0.874002
GO:0050859	negative regulation of B cell receptor signaling pathway	8	0.000401929	0.000223855	0.178443	0.874116
GO:0006771	riboflavin metabolic process	7	0.000401929	0.000223902	0.178583	0.874465
GO:0030334	regulation of cell migration	108	0.00844051	0.00728927	0.179185	0.87633
GO:1905460	negative regulation of vascular associated smooth muscle cell apoptotic process	7	0.000401929	0.000278575	0.179233	0.87633
GO:0032570	response to progesterone	43	0.00321543	0.00251813	0.17924	0.87633
GO:0061640	cytoskeleton-dependent cytokinesis	22	0.00200965	0.00148369	0.179399	0.876765
GO:0000423	mitophagy	8	0.000803859	0.00049829	0.179467	0.876765
GO:0010944	negative regulation of transcription by competitive promoter binding	11	0.00160772	0.00120512	0.179622	0.876848
GO:0042756	drinking behavior	8	0.000401929	0.000225184	0.179788	0.877321
GO:1904417	positive regulation of xenophagy	6	0.000401929	0.000209018	0.180191	0.878636
GO:0001958	endochondral ossification	30	0.00321543	0.00255957	0.180265	0.878636
GO:0009967	positive regulation of signal transduction	11	0.00120579	0.00082692	0.180691	0.879249
GO:0043029	T cell homeostasis	29	0.00200965	0.00151332	0.180737	0.879249
GO:0060335	positive regulation of interferon-gamma-mediated signaling pathway	6	0.000401929	0.000229889	0.180775	0.879249
GO:0002314	germinal center B cell differentiation	6	0.000401929	0.000222317	0.18225	0.884916
GO:0034616	response to laminar fluid shear stress	8	0.00120579	0.000845279	0.182414	0.885035
GO:0033152	immunoglobulin V(D)J recombination	5	0.000401929	0.000219148	0.182821	0.886333
GO:0048312	intracellular distribution of mitochondria	9	0.000803859	0.000503165	0.18327	0.887832
GO:0046890	regulation of lipid biosynthetic process	7	0.000401929	0.000220958	0.183604	0.889111
GO:0070345	negative regulation of fat cell proliferation	5	0.000803859	0.00050123	0.183746	0.889121
GO:0032958	inositol phosphate biosynthetic process	11	0.00120579	0.000810545	0.183957	0.889803
GO:0033133	positive regulation of glucokinase activity	6	0.000401929	0.00023315	0.184363	0.890749
GO:0019530	taurine metabolic process	5	0.000401929	0.000225987	0.184448	0.890821
GO:0014050	negative regulation of glutamate secretion	5	0.000401929	0.000249002	0.184873	0.892213
GO:0007602	phototransduction	31	0.00160772	0.0011268	0.184926	0.892213
GO:0006839	mitochondrial transport	23	0.00160772	0.00111566	0.185085	0.89254
GO:0016601	Rac protein signal transduction	23	0.00241158	0.00184191	0.185399	0.893437
GO:0097190	apoptotic signaling pathway	72	0.00401929	0.00325966	0.185482	0.893437
GO:0034982	mitochondrial protein processing	6	0.000401929	0.000223639	0.185723	0.893793
GO:0090336	positive regulation of brown fat cell differentiation	17	0.00200965	0.00149875	0.185926	0.894111
GO:0051289	protein homotetramerization	59	0.00361736	0.00287944	0.185974	0.894111
GO:0032147	activation of protein kinase activity	68	0.0068328	0.00589522	0.186341	0.895537
GO:0019509	L-methionine salvage from methylthioadenosine	5	0.000401929	0.000211058	0.186813	0.896448
GO:0035195	gene silencing by miRNA	262	0.00160772	0.00122993	0.187116	0.896886
GO:0016042	lipid catabolic process	127	0.00562701	0.00472056	0.187254	0.897209
GO:0033625	positive regulation of integrin activation	9	0.000803859	0.000524317	0.187642	0.89839
GO:0035641	locomotory exploration behavior	16	0.00120579	0.00082057	0.187801	0.898812
GO:0006544	glycine metabolic process	7	0.000401929	0.000223172	0.187964	0.898915
GO:0034105	positive regulation of tissue remodeling	6	0.000401929	0.000225779	0.188191	0.899416
GO:0035655	interleukin-18-mediated signaling pathway	7	0.000401929	0.000226375	0.188303	0.899416
GO:0010664	negative regulation of striated muscle cell apoptotic process	5	0.000401929	0.000227239	0.188352	0.899416
GO:0042908	xenobiotic transport	20	0.00120579	0.000803238	0.188564	0.900057
GO:0072672	neutrophil extravasation	6	0.000401929	0.000228521	0.188628	0.900057
GO:0050853	B cell receptor signaling pathway	116	0.0028135	0.00220933	0.188928	0.90089
GO:0033033	negative regulation of myeloid cell apoptotic process	6	0.000401929	0.000228862	0.188972	0.90089
GO:0016441	posttranscriptional gene silencing	6	0.000803859	0.000518341	0.189166	0.90089
GO:0090207	regulation of triglyceride metabolic process	7	0.000803859	0.000584191	0.189191	0.90089
GO:0046632	alpha-beta T cell differentiation	7	0.000803859	0.00052787	0.189299	0.90089
GO:0017015	regulation of transforming growth factor beta receptor signaling pathway	25	0.00321543	0.00262329	0.189387	0.900971
GO:0061000	negative regulation of dendritic spine development	6	0.000803859	0.000511893	0.189615	0.9015
GO:0006338	chromatin remodeling	112	0.0104502	0.00923048	0.18964	0.9015
GO:1903208	negative regulation of hydrogen peroxide-induced neuron death	5	0.000401929	0.000293043	0.189987	0.902811
GO:1902949	positive regulation of tau-protein kinase activity	8	0.000401929	0.000224513	0.190507	0.904461
GO:0032691	negative regulation of interleukin-1 beta production	41	0.00160772	0.0011713	0.190755	0.904461
GO:0070633	transepithelial transport	10	0.00120579	0.000834734	0.190765	0.904461
GO:0050715	positive regulation of cytokine secretion	31	0.00160772	0.00113354	0.19093	0.904461
GO:1902622	regulation of neutrophil migration	5	0.000401929	0.000229366	0.190975	0.904461
GO:0002011	morphogenesis of an epithelial sheet	10	0.00160772	0.00120043	0.191133	0.904872
GO:0008217	regulation of blood pressure	71	0.00442122	0.00365565	0.191421	0.90556
GO:0030032	lamellipodium assembly	36	0.00361736	0.00292277	0.191662	0.906363
GO:0099041	vesicle tethering to Golgi	5	0.000803859	0.000522604	0.191896	0.906615
GO:0010763	positive regulation of fibroblast migration	14	0.00160772	0.00117798	0.191974	0.906615
GO:0034197	triglyceride transport	5	0.000401929	0.000224677	0.192023	0.906615
GO:0060736	prostate gland growth	7	0.00120579	0.00087807	0.192033	0.906615
GO:0008089	anterograde axonal transport	32	0.0028135	0.00223231	0.192398	0.907142
GO:0062176	R-loop disassembly	5	0.000401929	0.000231681	0.192478	0.907182
GO:0072006	nephron development	11	0.00120579	0.000849258	0.192596	0.907401
GO:2000726	negative regulation of cardiac muscle cell differentiation	9	0.00120579	0.000904909	0.193562	0.911615
GO:0035726	common myeloid progenitor cell proliferation	7	0.000803859	0.000538777	0.193897	0.912516
GO:0036003	positive regulation of transcription from RNA polymerase II promoter in response to stress	7	0.000401929	0.000230171	0.194232	0.913125
GO:0043153	entrainment of circadian clock by photoperiod	29	0.00241158	0.00186695	0.19429	0.913125
GO:0097094	craniofacial suture morphogenesis	9	0.00120579	0.000843932	0.194314	0.913125
GO:0006873	cellular ion homeostasis	5	0.000401929	0.000239661	0.194537	0.913755
GO:0002666	positive regulation of T cell tolerance induction	5	0.000401929	0.000257401	0.194664	0.913755
GO:0042104	positive regulation of activated T cell proliferation	27	0.00160772	0.00117956	0.194933	0.914342
GO:0090091	positive regulation of extracellular matrix disassembly	8	0.000803859	0.000516678	0.195616	0.916531
GO:0046887	positive regulation of hormone secretion	11	0.00120579	0.000869584	0.195849	0.917284
GO:0035904	aorta development	24	0.00321543	0.00261904	0.196641	0.920654
GO:0007512	adult heart development	14	0.00120579	0.000846466	0.196822	0.920822
GO:0001764	neuron migration	119	0.0128617	0.0115697	0.197035	0.92107
GO:1901798	positive regulation of signal transduction by p53 class mediator	6	0.000401929	0.000241881	0.197154	0.92107
GO:0035067	negative regulation of histone acetylation	10	0.000803859	0.000509292	0.197385	0.921154
GO:0033292	T-tubule organization	9	0.000803859	0.000530693	0.197471	0.921154
GO:0050803	regulation of synapse structure or activity	11	0.00120579	0.000854723	0.197473	0.921154
GO:0006559	L-phenylalanine catabolic process	11	0.000401929	0.000230541	0.197865	0.922314
GO:1904951	positive regulation of establishment of protein localization	6	0.000803859	0.000535241	0.197867	0.922314
GO:0006351	transcription, DNA-templated	115	0.0096463	0.00859073	0.198456	0.9245
GO:1902188	positive regulation of viral release from host cell	10	0.000803859	0.000516304	0.198604	0.9245
GO:0017038	protein import	5	0.000401929	0.000258971	0.198612	0.9245
GO:0045893	positive regulation of transcription, DNA-templated	638	0.0558682	0.0527053	0.198627	0.9245
GO:0072207	metanephric epithelium development	5	0.000401929	0.000233494	0.199002	0.925554
GO:0007588	excretion	33	0.00200965	0.00155376	0.199072	0.925554
GO:0035331	negative regulation of hippo signaling	12	0.00160772	0.00117082	0.199219	0.925584
GO:0030878	thyroid gland development	26	0.00200965	0.00150432	0.199343	0.925584
GO:0070509	calcium ion import	23	0.00200965	0.00152119	0.199654	0.926564
GO:0045794	negative regulation of cell volume	5	0.000803859	0.000553973	0.200029	0.927751
GO:0003323	type B pancreatic cell development	14	0.00160772	0.00120431	0.200229	0.928215
GO:0017156	calcium-ion regulated exocytosis	30	0.00321543	0.00257993	0.200908	0.930509
GO:0043586	tongue development	12	0.00160772	0.0012296	0.200987	0.930509
GO:0003150	muscular septum morphogenesis	5	0.000803859	0.000531322	0.201002	0.930509
GO:1903997	positive regulation of non-membrane spanning protein tyrosine kinase activity	7	0.00120579	0.000868852	0.201168	0.930869
GO:1900029	positive regulation of ruffle assembly	15	0.00120579	0.00085764	0.201609	0.93257
GO:0007369	gastrulation	37	0.00321543	0.00264338	0.201937	0.933747
GO:0032049	cardiolipin biosynthetic process	9	0.000401929	0.000235168	0.202103	0.934175
GO:0045590	negative regulation of regulatory T cell differentiation	8	0.000401929	0.000237403	0.20247	0.93526
GO:0048661	positive regulation of smooth muscle cell proliferation	63	0.00602894	0.00517517	0.20302	0.936555
GO:1904646	cellular response to amyloid-beta	44	0.00401929	0.00338575	0.203046	0.936555
GO:0036462	TRAIL-activated apoptotic signaling pathway	6	0.000401929	0.000261491	0.203088	0.936555
GO:0051444	negative regulation of ubiquitin-protein transferase activity	9	0.000803859	0.000513133	0.203452	0.93734
GO:0030644	cellular chloride ion homeostasis	8	0.000803859	0.000536402	0.20416	0.939999
GO:0060325	face morphogenesis	32	0.00361736	0.00299517	0.204177	0.939999
GO:0050869	negative regulation of B cell activation	8	0.000401929	0.000239203	0.205042	0.942934
GO:0021554	optic nerve development	10	0.000803859	0.000541334	0.205249	0.942934
GO:0014905	myoblast fusion involved in skeletal muscle regeneration	5	0.000401929	0.000269551	0.205526	0.943815
GO:0021904	dorsal/ventral neural tube patterning	14	0.00120579	0.00083757	0.205829	0.944864
GO:0034145	positive regulation of toll-like receptor 4 signaling pathway	10	0.000803859	0.00052847	0.206328	0.946471
GO:1990776	response to angiotensin	5	0.000803859	0.000537169	0.206742	0.947686
GO:0043666	regulation of phosphoprotein phosphatase activity	50	0.00482315	0.00408194	0.206835	0.94777
GO:0032754	positive regulation of interleukin-5 production	13	0.00120579	0.000899477	0.207196	0.949039
GO:0032527	protein exit from endoplasmic reticulum	7	0.000401929	0.000245031	0.207336	0.949039
GO:0010035	response to inorganic substance	17	0.00160772	0.00121778	0.207448	0.949209
GO:0008347	glial cell migration	12	0.00120579	0.000863677	0.207571	0.94943
GO:0006082	organic acid metabolic process	22	0.000803859	0.000514735	0.207799	0.950131
GO:0021884	forebrain neuron development	6	0.000803859	0.000512467	0.208453	0.951797
GO:0003183	mitral valve morphogenesis	8	0.00120579	0.000887294	0.2085	0.951797
GO:0015813	L-glutamate transmembrane transport	16	0.00160772	0.00120724	0.208536	0.951797
GO:0045986	negative regulation of smooth muscle contraction	5	0.000803859	0.000554247	0.20859	0.951797
GO:2000649	regulation of sodium ion transmembrane transporter activity	18	0.00160772	0.00121158	0.208642	0.951797
GO:0050435	amyloid-beta metabolic process	14	0.00120579	0.000835858	0.208688	0.951797
GO:0009416	response to light stimulus	28	0.00241158	0.00189934	0.208872	0.952294
GO:0086036	regulation of cardiac muscle cell membrane potential	7	0.000803859	0.000562762	0.209801	0.954559
GO:0050908	detection of light stimulus involved in visual perception	21	0.00120579	0.00083957	0.209815	0.954559
GO:0043030	regulation of macrophage activation	11	0.00120579	0.000916223	0.209824	0.954559
GO:0035019	somatic stem cell population maintenance	64	0.00602894	0.0051995	0.209953	0.954559
GO:0003209	cardiac atrium morphogenesis	7	0.000803859	0.000521675	0.210045	0.954559
GO:0060716	labyrinthine layer blood vessel development	21	0.00200965	0.00155046	0.21013	0.954603
GO:0007584	response to nutrient	81	0.00562701	0.00482768	0.210361	0.954651
GO:0038063	collagen-activated tyrosine kinase receptor signaling pathway	12	0.00120579	0.000839194	0.210366	0.954651
GO:0098962	regulation of postsynaptic neurotransmitter receptor activity	17	0.00200965	0.00155623	0.211478	0.958177
GO:0043551	regulation of phosphatidylinositol 3-kinase activity	19	0.00200965	0.00157724	0.211517	0.958177
GO:0032332	positive regulation of chondrocyte differentiation	18	0.00200965	0.0015679	0.21159	0.958177
GO:0010898	positive regulation of triglyceride catabolic process	9	0.000401929	0.000253063	0.21165	0.958177
GO:0032680	regulation of tumor necrosis factor production	14	0.00120579	0.000867394	0.211822	0.958177
GO:0009086	methionine biosynthetic process	11	0.000803859	0.000512823	0.211888	0.958177
GO:0014824	artery smooth muscle contraction	10	0.000803859	0.000528613	0.212098	0.958177
GO:0034380	high-density lipoprotein particle assembly	13	0.000803859	0.000540212	0.212104	0.958177
GO:0060339	negative regulation of type I interferon-mediated signaling pathway	15	0.00120579	0.000900374	0.21219	0.958177
GO:0060253	negative regulation of glial cell proliferation	10	0.000803859	0.000536321	0.212199	0.958177
GO:0070291	N-acylethanolamine metabolic process	5	0.000401929	0.000249997	0.212312	0.958346
GO:0090156	cellular sphingolipid homeostasis	5	0.000401929	0.000246265	0.21249	0.958469
GO:0038084	vascular endothelial growth factor signaling pathway	17	0.00200965	0.00158939	0.212692	0.959039
GO:0060687	regulation of branching involved in prostate gland morphogenesis	6	0.000803859	0.000545454	0.212854	0.959089
GO:0002175	protein localization to paranode region of axon	5	0.000803859	0.000549721	0.213084	0.959785
GO:0044528	regulation of mitochondrial mRNA stability	7	0.000401929	0.000250082	0.213301	0.960081
GO:1903307	positive regulation of regulated secretory pathway	5	0.000401929	0.000240468	0.213465	0.960479
GO:1902992	negative regulation of amyloid precursor protein catabolic process	8	0.000401929	0.000245306	0.213623	0.960682
GO:1990822	basic amino acid transmembrane transport	6	0.000401929	0.000248758	0.213686	0.960682
GO:0048167	regulation of synaptic plasticity	56	0.00522508	0.00447437	0.213737	0.960682
GO:0009312	oligosaccharide biosynthetic process	13	0.00120579	0.000839848	0.21387	0.96094
GO:0035810	positive regulation of urine volume	14	0.00120579	0.000862344	0.214124	0.960961
GO:0002438	acute inflammatory response to antigenic stimulus	7	0.000401929	0.00028456	0.214228	0.960961
GO:0006979	response to oxidative stress	132	0.00803859	0.00704721	0.214269	0.960961
GO:0060512	prostate gland morphogenesis	5	0.000803859	0.000528147	0.214376	0.960961
GO:1901018	positive regulation of potassium ion transmembrane transporter activity	6	0.000803859	0.000543606	0.214576	0.960966
GO:0007565	female pregnancy	95	0.00602894	0.00515444	0.214656	0.960966
GO:0090158	endoplasmic reticulum membrane organization	6	0.000803859	0.000559412	0.214708	0.960966
GO:1904862	inhibitory synapse assembly	12	0.00160772	0.00122963	0.214827	0.96116
GO:0014904	myotube cell development	5	0.000803859	0.000578635	0.215075	0.961755
GO:0036342	post-anal tail morphogenesis	19	0.00160772	0.00122224	0.215183	0.961755
GO:0009311	oligosaccharide metabolic process	21	0.00160772	0.00120985	0.215727	0.962812
GO:0006816	calcium ion transport	148	0.0100482	0.00901456	0.215857	0.962895
GO:0055093	response to hyperoxia	16	0.00120579	0.000869459	0.21601	0.96306
GO:0009267	cellular response to starvation	76	0.00602894	0.00520847	0.216308	0.964051
GO:0040016	embryonic cleavage	6	0.000803859	0.000545751	0.216425	0.964158
GO:0030278	regulation of ossification	14	0.00200965	0.00160687	0.216484	0.964158
GO:0046475	glycerophospholipid catabolic process	15	0.000803859	0.000532606	0.21725	0.966474
GO:0098656	anion transmembrane transport	50	0.00401929	0.00339202	0.217677	0.966474
GO:0009791	post-embryonic development	75	0.00844051	0.00753446	0.21782	0.966474
GO:0051897	positive regulation of protein kinase B signaling	185	0.0140675	0.0127715	0.217965	0.966474
GO:0042448	progesterone metabolic process	10	0.000401929	0.000247028	0.218043	0.966474
GO:0071482	cellular response to light stimulus	17	0.000803859	0.000526062	0.218108	0.966474
GO:0032692	negative regulation of interleukin-1 production	6	0.000401929	0.000252317	0.218194	0.966474
GO:0035108	limb morphogenesis	26	0.00241158	0.00193045	0.218455	0.966474
GO:0003211	cardiac ventricle formation	5	0.000803859	0.000577417	0.218592	0.966474
GO:0018394	peptidyl-lysine acetylation	6	0.000803859	0.000569383	0.218673	0.966474
GO:0051573	negative regulation of histone H3-K9 methylation	6	0.000803859	0.000559863	0.218704	0.966474
GO:1990266	neutrophil migration	10	0.000401929	0.000248998	0.218716	0.966474
GO:0010042	response to manganese ion	8	0.000803859	0.000535595	0.218775	0.966474
GO:0001505	regulation of neurotransmitter levels	6	0.000401929	0.000249771	0.218786	0.966474
GO:0010040	response to iron(II) ion	5	0.000401929	0.000251742	0.21883	0.966474
GO:0032780	negative regulation of ATPase activity	12	0.000803859	0.000531326	0.219082	0.967175
GO:0033598	mammary gland epithelial cell proliferation	9	0.00120579	0.000870506	0.219141	0.967175
GO:0006897	endocytosis	242	0.0188907	0.0172643	0.21944	0.968158
GO:0045717	negative regulation of fatty acid biosynthetic process	17	0.00120579	0.000882987	0.219867	0.969044
GO:2000573	positive regulation of DNA biosynthetic process	16	0.00160772	0.00122132	0.219911	0.969044
GO:0089718	amino acid import across plasma membrane	14	0.00120579	0.000866795	0.219946	0.969044
GO:0050966	detection of mechanical stimulus involved in sensory perception of pain	14	0.00160772	0.00122617	0.220217	0.969763
GO:0033194	response to hydroperoxide	9	0.000803859	0.000557183	0.220397	0.969763
GO:0007399	nervous system development	549	0.0514469	0.0485143	0.22049	0.969763
GO:0006084	acetyl-CoA metabolic process	6	0.000401929	0.000254173	0.220491	0.969763
GO:0060999	positive regulation of dendritic spine development	24	0.00321543	0.00268917	0.220928	0.971301
GO:0045862	positive regulation of proteolysis	20	0.00160772	0.00123743	0.221062	0.971301
GO:2000434	regulation of protein neddylation	6	0.00120579	0.000909482	0.22107	0.971301
GO:0070779	D-aspartate import across plasma membrane	5	0.000803859	0.000551064	0.221412	0.972467
GO:0061303	cornea development in camera-type eye	10	0.000803859	0.000553083	0.22151	0.972561
GO:0042487	regulation of odontogenesis of dentin-containing tooth	7	0.000803859	0.000560396	0.22195	0.974156
GO:0046826	negative regulation of protein export from nucleus	6	0.000401929	0.000254008	0.222223	0.974681
GO:1904358	positive regulation of telomere maintenance via telomere lengthening	5	0.000401929	0.000255389	0.222463	0.974876
GO:0042531	positive regulation of tyrosine phosphorylation of STAT protein	72	0.00401929	0.00334746	0.222521	0.974876
GO:0002262	myeloid cell homeostasis	9	0.000803859	0.000549799	0.222617	0.974876
GO:0032012	regulation of ARF protein signal transduction	18	0.00200965	0.00160818	0.222724	0.974876
GO:0016578	histone deubiquitination	13	0.00120579	0.000900864	0.22301	0.974876
GO:0010837	regulation of keratinocyte proliferation	7	0.00120579	0.000917564	0.223169	0.974876
GO:0045665	negative regulation of neuron differentiation	63	0.00562701	0.00488005	0.223258	0.974876
GO:0007043	cell-cell junction assembly	39	0.00361736	0.00300633	0.223334	0.974876
GO:0002735	positive regulation of myeloid dendritic cell cytokine production	6	0.000401929	0.000254869	0.223342	0.974876
GO:0002043	blood vessel endothelial cell proliferation involved in sprouting angiogenesis	7	0.000803859	0.000543076	0.22359	0.975624
GO:0071107	response to parathyroid hormone	5	0.000401929	0.000251444	0.224217	0.977666
GO:0045869	negative regulation of single stranded viral RNA replication via double stranded DNA intermediate	16	0.00120579	0.000864474	0.224305	0.977666
GO:0090279	regulation of calcium ion import	10	0.00120579	0.000930016	0.224942	0.97984
GO:0046629	gamma-delta T cell activation	5	0.000401929	0.000279501	0.225074	0.980079
GO:0030071	regulation of mitotic metaphase/anaphase transition	10	0.000803859	0.000553756	0.225295	0.980705
GO:0120193	tight junction organization	5	0.000401929	0.000255883	0.225759	0.9823
GO:0000098	sulfur amino acid catabolic process	6	0.000401929	0.000259456	0.22606	0.9823
GO:0002260	lymphocyte homeostasis	10	0.00120579	0.000910397	0.226086	0.9823
GO:0045892	negative regulation of transcription, DNA-templated	587	0.0478296	0.0453369	0.226107	0.9823
GO:0034620	cellular response to unfolded protein	27	0.00160772	0.00120266	0.226175	0.9823
GO:0006807	nitrogen compound metabolic process	21	0.00160772	0.00121846	0.22626	0.9823
GO:0080154	regulation of fertilization	5	0.000401929	0.000295956	0.226371	0.9823
GO:1904894	positive regulation of receptor signaling pathway via STAT	5	0.000401929	0.000249862	0.226432	0.9823
GO:0034384	high-density lipoprotein particle clearance	10	0.000401929	0.000258264	0.226436	0.9823
GO:0010838	positive regulation of keratinocyte proliferation	15	0.00120579	0.000911585	0.226454	0.9823
GO:0060158	phospholipase C-activating dopamine receptor signaling pathway	8	0.000401929	0.000258946	0.226855	0.983116
GO:0006914	autophagy	190	0.0124598	0.0112143	0.227112	0.983854
GO:0030970	retrograde protein transport, ER to cytosol	15	0.00120579	0.000873496	0.22731	0.983854
GO:0002281	macrophage activation involved in immune response	14	0.000803859	0.000541042	0.227438	0.983854
GO:0061049	cell growth involved in cardiac muscle cell development	16	0.00120579	0.000908775	0.227485	0.983854
GO:0031145	anaphase-promoting complex-dependent catabolic process	84	0.00361736	0.00298886	0.227716	0.984496
GO:1900016	negative regulation of cytokine production involved in inflammatory response	40	0.00120579	0.000877921	0.227979	0.984578
GO:0001947	heart looping	65	0.00522508	0.00455244	0.228045	0.984578
GO:0042355	L-fucose catabolic process	9	0.000803859	0.000592071	0.228225	0.984683
GO:0061337	cardiac conduction	50	0.00401929	0.00339195	0.228298	0.984683
GO:0045737	positive regulation of cyclin-dependent protein serine/threonine kinase activity	29	0.00321543	0.00265643	0.228302	0.984683
GO:0035556	intracellular signal transduction	461	0.0361736	0.0341838	0.228601	0.984911
GO:0002326	B cell lineage commitment	5	0.000401929	0.000256672	0.228737	0.984911
GO:0001886	endothelial cell morphogenesis	14	0.00120579	0.000870908	0.228831	0.984911
GO:0070244	negative regulation of thymocyte apoptotic process	9	0.000803859	0.000543681	0.229108	0.984911
GO:1901216	positive regulation of neuron death	42	0.00321543	0.00266235	0.22921	0.984911
GO:0033151	V(D)J recombination	9	0.000803859	0.000533196	0.229466	0.984911
GO:0006357	regulation of transcription by RNA polymerase II	1453	0.101688	0.0975472	0.22949	0.984911
GO:0050901	leukocyte tethering or rolling	20	0.00160772	0.00123394	0.229518	0.984911
GO:0001890	placenta development	47	0.0028135	0.00228287	0.230024	0.986749
GO:0042541	hemoglobin biosynthetic process	6	0.000401929	0.000282659	0.23053	0.988116
GO:0099527	postsynapse to nucleus signaling pathway	10	0.00120579	0.000895639	0.230576	0.988116
GO:0032633	interleukin-4 production	9	0.00120579	0.000929822	0.230785	0.988678
GO:0021953	central nervous system neuron differentiation	9	0.00120579	0.00091026	0.231237	0.989947
GO:0043504	mitochondrial DNA repair	6	0.000401929	0.000265735	0.231321	0.98996
GO:0030099	myeloid cell differentiation	27	0.00200965	0.00161973	0.231396	0.98996
GO:0042572	retinol metabolic process	48	0.00200965	0.00154019	0.231814	0.990871
GO:0006654	phosphatidic acid biosynthetic process	50	0.00321543	0.00266968	0.231837	0.990871
GO:0060326	cell chemotaxis	89	0.00482315	0.0041063	0.231862	0.990871
GO:0015695	organic cation transport	10	0.000401929	0.000262259	0.23237	0.992169
GO:0002725	negative regulation of T cell cytokine production	6	0.000401929	0.00026005	0.232381	0.992169
GO:0043507	positive regulation of JUN kinase activity	38	0.00361736	0.00306859	0.232768	0.99226
GO:0010868	negative regulation of triglyceride biosynthetic process	5	0.000401929	0.000283485	0.23283	0.99226
GO:0030166	proteoglycan biosynthetic process	20	0.00200965	0.00160777	0.233037	0.992302
GO:0061470	T follicular helper cell differentiation	7	0.000803859	0.00060554	0.23363	0.994493
GO:0098719	sodium ion import across plasma membrane	19	0.00160772	0.00122896	0.234123	0.995941
GO:0035461	vitamin transmembrane transport	6	0.000401929	0.000263144	0.234127	0.995941
GO:0050829	defense response to Gram-negative bacterium	84	0.00200965	0.00152302	0.234889	0.998012
GO:0048666	neuron development	64	0.0068328	0.00607015	0.234984	0.998012
GO:0033539	fatty acid beta-oxidation using acyl-CoA dehydrogenase	10	0.000401929	0.000264726	0.235042	0.998012
GO:0055085	transmembrane transport	650	0.0377814	0.03566	0.235105	0.998012
GO:0042998	positive regulation of Golgi to plasma membrane protein transport	5	0.000401929	0.000258099	0.235215	0.998012
GO:0006896	Golgi to vacuole transport	9	0.000803859	0.000563211	0.235299	0.998012
GO:0035791	platelet-derived growth factor receptor-beta signaling pathway	6	0.000803859	0.000561311	0.235321	0.998012
GO:0090179	planar cell polarity pathway involved in neural tube closure	12	0.00120579	0.000877111	0.235596	0.998512
GO:0019222	regulation of metabolic process	24	0.00160772	0.00126126	0.235675	0.998514
GO:0003094	glomerular filtration	15	0.00120579	0.000904492	0.235882	0.999057
GO:0031573	intra-S DNA damage checkpoint	15	0.000803859	0.000559047	0.236553	1
GO:0042267	natural killer cell mediated cytotoxicity	18	0.000803859	0.000548474	0.236997	1
GO:0033120	positive regulation of RNA splicing	14	0.00160772	0.00127786	0.237155	1
GO:0061518	microglial cell proliferation	7	0.000401929	0.00026929	0.237798	1
GO:0000422	autophagy of mitochondrion	38	0.0028135	0.00227602	0.237967	1
GO:0032446	protein modification by small protein conjugation	11	0.000803859	0.000557984	0.238715	1
GO:0006290	pyrimidine dimer repair	5	0.000401929	0.000273957	0.238722	1
GO:0001502	cartilage condensation	21	0.00200965	0.00161807	0.239102	1
GO:0042045	epithelial fluid transport	7	0.000803859	0.000556947	0.239237	1
GO:0030091	protein repair	5	0.000401929	0.000272055	0.239556	1
GO:0000186	activation of MAPKK activity	46	0.00482315	0.0041798	0.239645	1
GO:0044770	cell cycle phase transition	6	0.000401929	0.000267886	0.239814	1
GO:2000535	regulation of entry of bacterium into host cell	5	0.000401929	0.000266296	0.23985	1
GO:0097350	neutrophil clearance	5	0.000401929	0.000263567	0.239895	1
GO:0051645	Golgi localization	6	0.000803859	0.000620135	0.239919	1
GO:0030579	ubiquitin-dependent SMAD protein catabolic process	6	0.000803859	0.000564872	0.240456	1
GO:0031064	negative regulation of histone deacetylation	6	0.000401929	0.000290718	0.240502	1
GO:0005980	glycogen catabolic process	17	0.00120579	0.000897255	0.240514	1
GO:0035307	positive regulation of protein dephosphorylation	26	0.00200965	0.00161298	0.240732	1
GO:0009299	mRNA transcription	6	0.000803859	0.000603373	0.240793	1
GO:1990542	mitochondrial transmembrane transport	8	0.000401929	0.000270875	0.241107	1
GO:0001938	positive regulation of endothelial cell proliferation	75	0.00643087	0.00567761	0.241128	1
GO:0071947	protein deubiquitination involved in ubiquitin-dependent protein catabolic process	12	0.000803859	0.000575341	0.241434	1
GO:0043268	positive regulation of potassium ion transport	10	0.00120579	0.000908447	0.241626	1
GO:0009190	cyclic nucleotide biosynthetic process	18	0.00160772	0.00128994	0.242176	1
GO:0021559	trigeminal nerve development	7	0.000803859	0.000570584	0.242462	1
GO:2000670	positive regulation of dendritic cell apoptotic process	5	0.000401929	0.000265321	0.242515	1
GO:0070588	calcium ion transmembrane transport	132	0.0100482	0.00914781	0.242536	1
GO:0010656	negative regulation of muscle cell apoptotic process	5	0.000401929	0.000277086	0.242554	1
GO:0007223	Wnt signaling pathway, calcium modulating pathway	37	0.00522508	0.00463331	0.242724	1
GO:2000178	negative regulation of neural precursor cell proliferation	12	0.00120579	0.000912083	0.242813	1
GO:0035640	exploration behavior	16	0.00160772	0.00127242	0.242946	1
GO:0032331	negative regulation of chondrocyte differentiation	21	0.00200965	0.00161274	0.243223	1
GO:0034351	negative regulation of glial cell apoptotic process	7	0.000803859	0.000574789	0.24361	1
GO:0070233	negative regulation of T cell apoptotic process	9	0.000401929	0.000271203	0.243842	1
GO:0042542	response to hydrogen peroxide	59	0.00482315	0.00419695	0.243901	1
GO:0150104	transport across blood-brain barrier	84	0.00723473	0.00645558	0.24407	1
GO:2001137	positive regulation of endocytic recycling	6	0.000401929	0.000275334	0.244159	1
GO:0003181	atrioventricular valve morphogenesis	12	0.00160772	0.00126167	0.244466	1
GO:0051055	negative regulation of lipid biosynthetic process	9	0.000401929	0.000285291	0.244482	1
GO:0046940	nucleoside monophosphate phosphorylation	12	0.00120579	0.000892196	0.244838	1
GO:0035137	hindlimb morphogenesis	11	0.00120579	0.000915221	0.244929	1
GO:0001832	blastocyst growth	5	0.000401929	0.000277349	0.245419	1
GO:0045618	positive regulation of keratinocyte differentiation	20	0.00120579	0.000904801	0.245453	1
GO:0046755	viral budding	9	0.000803859	0.000562467	0.245981	1
GO:0106072	negative regulation of adenylate cyclase-activating G protein-coupled receptor signaling pathway	6	0.000401929	0.000302953	0.246264	1
GO:0033700	phospholipid efflux	12	0.000401929	0.000279144	0.246796	1
GO:0007617	mating behavior	8	0.000803859	0.000553018	0.247041	1
GO:0033280	response to vitamin D	18	0.00120579	0.000899296	0.247099	1
GO:1902916	positive regulation of protein polyubiquitination	7	0.000803859	0.000566644	0.247361	1
GO:0001887	selenium compound metabolic process	5	0.000401929	0.000269992	0.24788	1
GO:0010596	negative regulation of endothelial cell migration	24	0.00200965	0.00160662	0.248007	1
GO:0051902	negative regulation of mitochondrial depolarization	6	0.000401929	0.000274315	0.248017	1
GO:0003376	sphingosine-1-phosphate receptor signaling pathway	14	0.00120579	0.000899145	0.248056	1
GO:0060354	negative regulation of cell adhesion molecule production	15	0.000401929	0.000277201	0.248195	1
GO:0031999	negative regulation of fatty acid beta-oxidation	5	0.000401929	0.000291273	0.248223	1
GO:0048505	regulation of timing of cell differentiation	6	0.000803859	0.00057884	0.248474	1
GO:0031047	gene silencing by RNA	66	0.00602894	0.00534642	0.248754	1
GO:0051047	positive regulation of secretion	5	0.000401929	0.000280266	0.248868	1
GO:0002931	response to ischemia	59	0.00482315	0.00421009	0.248907	1
GO:1990592	protein K69-linked ufmylation	5	0.000401929	0.00026917	0.249219	1
GO:0007189	adenylate cyclase-activating G protein-coupled receptor signaling pathway	118	0.00723473	0.00646048	0.249265	1
GO:0051403	stress-activated MAPK cascade	27	0.00241158	0.00199969	0.249279	1
GO:0032914	positive regulation of transforming growth factor beta1 production	6	0.000401929	0.000274947	0.249352	1
GO:0051549	positive regulation of keratinocyte migration	12	0.00160772	0.00128791	0.249441	1
GO:0046888	negative regulation of hormone secretion	11	0.000803859	0.000561268	0.249465	1
GO:0008284	positive regulation of cell population proliferation	554	0.0381833	0.0362049	0.24953	1
GO:0034427	nuclear-transcribed mRNA catabolic process, exonucleolytic, 3'-5'	9	0.000401929	0.000262775	0.249631	1
GO:1903039	positive regulation of leukocyte cell-cell adhesion	5	0.000401929	0.000282916	0.249739	1
GO:0042723	thiamine-containing compound metabolic process	5	0.000401929	0.000272636	0.249881	1
GO:0032728	positive regulation of interferon-beta production	34	0.00241158	0.00199596	0.250049	1
GO:1901652	response to peptide	7	0.000401929	0.000295653	0.250346	1
GO:0046949	fatty-acyl-CoA biosynthetic process	12	0.000803859	0.000560945	0.250461	1
GO:1990349	gap junction-mediated intercellular transport	6	0.000401929	0.000274533	0.250672	1
GO:0060219	camera-type eye photoreceptor cell differentiation	5	0.000401929	0.000273141	0.250685	1
GO:0033108	mitochondrial respiratory chain complex assembly	6	0.000401929	0.000281968	0.250752	1
GO:0015793	glycerol transport	8	0.000401929	0.000276434	0.250883	1
GO:0030433	ubiquitin-dependent ERAD pathway	74	0.00522508	0.00457109	0.251079	1
GO:0007186	G protein-coupled receptor signaling pathway	1165	0.0373794	0.0354294	0.25115	1
GO:0008211	glucocorticoid metabolic process	5	0.000401929	0.00035286	0.251379	1
GO:0006379	mRNA cleavage	8	0.000401929	0.000271197	0.251741	1
GO:0045602	negative regulation of endothelial cell differentiation	10	0.000803859	0.000593632	0.251966	1
GO:0090160	Golgi to lysosome transport	9	0.000803859	0.000583385	0.251994	1
GO:0042986	positive regulation of amyloid precursor protein biosynthetic process	5	0.000401929	0.000279256	0.252032	1
GO:0034698	response to gonadotropin	6	0.000401929	0.000279416	0.252173	1
GO:0071774	response to fibroblast growth factor	8	0.000803859	0.000571794	0.25254	1
GO:0042325	regulation of phosphorylation	19	0.00120579	0.000927339	0.252636	1
GO:0001837	epithelial to mesenchymal transition	43	0.00442122	0.00382646	0.252949	1
GO:0043087	regulation of GTPase activity	89	0.00884244	0.00805194	0.25352	1
GO:0033004	negative regulation of mast cell activation	5	0.000401929	0.00029189	0.253954	1
GO:1901911	adenosine 5'-(hexahydrogen pentaphosphate) catabolic process	5	0.000401929	0.000270105	0.253983	1
GO:1901907	diadenosine pentaphosphate catabolic process	5	0.000401929	0.000270105	0.253983	1
GO:1901909	diadenosine hexaphosphate catabolic process	5	0.000401929	0.000270105	0.253983	1
GO:0071543	diphosphoinositol polyphosphate metabolic process	5	0.000401929	0.000270105	0.253983	1
GO:0001516	prostaglandin biosynthetic process	19	0.000803859	0.000571597	0.253991	1
GO:0017185	peptidyl-lysine hydroxylation	8	0.000401929	0.000278679	0.25402	1
GO:0030968	endoplasmic reticulum unfolded protein response	54	0.00401929	0.00347489	0.254239	1
GO:0043266	regulation of potassium ion transport	6	0.000401929	0.000305397	0.254393	1
GO:0097345	mitochondrial outer membrane permeabilization	9	0.000803859	0.000581364	0.25471	1
GO:0030203	glycosaminoglycan metabolic process	14	0.00120579	0.000929178	0.254837	1
GO:0061684	chaperone-mediated autophagy	7	0.000803859	0.000586307	0.255	1
GO:0045723	positive regulation of fatty acid biosynthetic process	14	0.000803859	0.000604472	0.255764	1
GO:0044828	negative regulation by host of viral genome replication	11	0.000803859	0.000582133	0.256075	1
GO:0031063	regulation of histone deacetylation	5	0.000401929	0.000324051	0.256273	1
GO:0099601	regulation of neurotransmitter receptor activity	11	0.000401929	0.000281841	0.256372	1
GO:0045617	negative regulation of keratinocyte differentiation	8	0.000803859	0.000581177	0.256536	1
GO:0006471	protein ADP-ribosylation	24	0.00160772	0.00126174	0.256591	1
GO:0071320	cellular response to cAMP	54	0.00482315	0.00424354	0.257557	1
GO:0006072	glycerol-3-phosphate metabolic process	9	0.000803859	0.000586032	0.257595	1
GO:0021957	corticospinal tract morphogenesis	5	0.00120579	0.000979708	0.257827	1
GO:0043304	regulation of mast cell degranulation	10	0.000803859	0.000578004	0.258102	1
GO:0070104	negative regulation of interleukin-6-mediated signaling pathway	14	0.000401929	0.000287893	0.258209	1
GO:0050872	white fat cell differentiation	16	0.00160772	0.00131719	0.25837	1
GO:0045599	negative regulation of fat cell differentiation	57	0.00482315	0.00424664	0.258444	1
GO:0000188	inactivation of MAPK activity	26	0.00241158	0.00200847	0.258516	1
GO:0051290	protein heterotetramerization	15	0.00120579	0.000932141	0.258548	1
GO:0034383	low-density lipoprotein particle clearance	24	0.00160772	0.00125446	0.258556	1
GO:2000378	negative regulation of reactive oxygen species metabolic process	23	0.00160772	0.00126602	0.258564	1
GO:0042116	macrophage activation	15	0.000803859	0.000570022	0.258799	1
GO:0030238	male sex determination	13	0.00120579	0.000950733	0.258983	1
GO:0048513	animal organ development	23	0.00200965	0.0016529	0.259053	1
GO:0120163	negative regulation of cold-induced thermogenesis	47	0.00401929	0.00347986	0.259249	1
GO:0007264	small GTPase mediated signal transduction	123	0.0096463	0.00873072	0.259578	1
GO:0045779	negative regulation of bone resorption	16	0.00120579	0.000919865	0.260677	1
GO:2000379	positive regulation of reactive oxygen species metabolic process	31	0.00200965	0.00163817	0.260916	1
GO:0060341	regulation of cellular localization	7	0.000803859	0.000603232	0.261104	1
GO:0050819	negative regulation of coagulation	8	0.000401929	0.000291258	0.26264	1
GO:0071157	negative regulation of cell cycle arrest	24	0.00160772	0.00130528	0.262865	1
GO:0002446	neutrophil mediated immunity	10	0.000803859	0.000578484	0.263245	1
GO:0008038	neuron recognition	6	0.000803859	0.000584491	0.263263	1
GO:0019885	antigen processing and presentation of endogenous peptide antigen via MHC class I	10	0.000803859	0.000582161	0.263863	1
GO:0007202	activation of phospholipase C activity	34	0.00241158	0.00201391	0.264092	1
GO:0007052	mitotic spindle organization	51	0.00321543	0.00274928	0.264848	1
GO:0007204	positive regulation of cytosolic calcium ion concentration	159	0.00924437	0.00838138	0.265083	1
GO:0061072	iris morphogenesis	10	0.00120579	0.000970081	0.265129	1
GO:0038061	NIK/NF-kappaB signaling	71	0.00321543	0.00272906	0.265316	1
GO:0043267	negative regulation of potassium ion transport	10	0.000803859	0.000584281	0.265441	1
GO:0015816	glycine transport	10	0.000803859	0.000580802	0.265646	1
GO:0043542	endothelial cell migration	33	0.0028135	0.00238081	0.266413	1
GO:1902219	negative regulation of intrinsic apoptotic signaling pathway in response to osmotic stress	5	0.000401929	0.000284992	0.266495	1
GO:0010815	bradykinin catabolic process	5	0.000401929	0.000290209	0.266827	1
GO:0010457	centriole-centriole cohesion	12	0.00120579	0.000941114	0.267217	1
GO:0097756	negative regulation of blood vessel diameter	10	0.000401929	0.000285653	0.267347	1
GO:0010922	positive regulation of phosphatase activity	5	0.000401929	0.000290061	0.267508	1
GO:0051610	serotonin uptake	7	0.000401929	0.00028308	0.267798	1
GO:0061041	regulation of wound healing	5	0.000401929	0.000303272	0.268083	1
GO:0050974	detection of mechanical stimulus involved in sensory perception	5	0.000401929	0.000291907	0.268194	1
GO:0071902	positive regulation of protein serine/threonine kinase activity	53	0.00401929	0.00347633	0.268465	1
GO:0097327	response to antineoplastic agent	6	0.000803859	0.000630053	0.268549	1
GO:0048205	COPI coating of Golgi vesicle	6	0.000401929	0.000284639	0.268844	1
GO:0051304	chromosome separation	6	0.000401929	0.000297294	0.269363	1
GO:0071280	cellular response to copper ion	28	0.00120579	0.00093409	0.269413	1
GO:0032640	tumor necrosis factor production	7	0.000401929	0.000296614	0.269651	1
GO:0060350	endochondral bone morphogenesis	6	0.000803859	0.000616	0.269995	1
GO:1903244	positive regulation of cardiac muscle hypertrophy in response to stress	10	0.000401929	0.000306683	0.270021	1
GO:0051298	centrosome duplication	17	0.00160772	0.00129006	0.270314	1
GO:0040038	polar body extrusion after meiotic divisions	5	0.000401929	0.000295349	0.270654	1
GO:0048873	homeostasis of number of cells within a tissue	30	0.00241158	0.00202864	0.270668	1
GO:0051081	nuclear envelope disassembly	5	0.000401929	0.000309195	0.270766	1
GO:0036336	dendritic cell migration	6	0.000401929	0.000292746	0.271062	1
GO:0090201	negative regulation of release of cytochrome c from mitochondria	21	0.00160772	0.00130028	0.27108	1
GO:0001935	endothelial cell proliferation	18	0.00160772	0.0013136	0.271234	1
GO:0080111	DNA demethylation	19	0.00160772	0.00132136	0.271337	1
GO:0015918	sterol transport	20	0.00200965	0.00167245	0.271515	1
GO:0016477	cell migration	261	0.0217042	0.020481	0.271606	1
GO:1900747	negative regulation of vascular endothelial growth factor signaling pathway	20	0.00120579	0.000946345	0.271851	1
GO:0046513	ceramide biosynthetic process	32	0.00241158	0.0020578	0.271869	1
GO:0045843	negative regulation of striated muscle tissue development	6	0.000401929	0.000288917	0.271985	1
GO:2000562	negative regulation of CD4-positive, alpha-beta T cell proliferation	10	0.000401929	0.000288098	0.272093	1
GO:0001756	somitogenesis	50	0.00442122	0.00388726	0.272234	1
GO:0001959	regulation of cytokine-mediated signaling pathway	8	0.000803859	0.000608603	0.272279	1
GO:0001731	formation of translation preinitiation complex	11	0.000803859	0.000583559	0.272362	1
GO:1903204	negative regulation of oxidative stress-induced neuron death	16	0.00200965	0.00169412	0.272488	1
GO:2000377	regulation of reactive oxygen species metabolic process	24	0.00160772	0.00130075	0.272503	1
GO:0007010	cytoskeleton organization	173	0.0128617	0.0119863	0.272559	1
GO:0045541	negative regulation of cholesterol biosynthetic process	9	0.000401929	0.000293468	0.27367	1
GO:0071569	protein ufmylation	6	0.000401929	0.000287525	0.273684	1
GO:0060712	spongiotrophoblast layer development	8	0.000803859	0.000612166	0.273852	1
GO:0055092	sterol homeostasis	5	0.000401929	0.000301741	0.273942	1
GO:0071625	vocalization behavior	16	0.00160772	0.00130922	0.274016	1
GO:0022900	electron transport chain	91	0.00321543	0.00270696	0.275038	1
GO:0007292	female gamete generation	22	0.00120579	0.000939627	0.275101	1
GO:0046928	regulation of neurotransmitter secretion	21	0.00200965	0.00168797	0.27551	1
GO:0048667	cell morphogenesis involved in neuron differentiation	9	0.00120579	0.000970708	0.276506	1
GO:0042743	hydrogen peroxide metabolic process	7	0.000401929	0.000301069	0.277571	1
GO:0003281	ventricular septum development	36	0.00401929	0.00351651	0.277588	1
GO:0021819	layer formation in cerebral cortex	13	0.00160772	0.00132444	0.27797	1
GO:0000727	double-strand break repair via break-induced replication	12	0.000401929	0.000293776	0.278357	1
GO:0051415	microtubule nucleation by interphase microtubule organizing center	6	0.000401929	0.000304773	0.278494	1
GO:0048708	astrocyte differentiation	7	0.000803859	0.000626252	0.278574	1
GO:0015014	heparan sulfate proteoglycan biosynthetic process, polysaccharide chain biosynthetic process	8	0.000803859	0.000605346	0.278652	1
GO:0007568	aging	185	0.0120579	0.0111817	0.280203	1
GO:0071205	protein localization to juxtaparanode region of axon	5	0.000803859	0.00061694	0.280233	1
GO:0007220	Notch receptor processing	9	0.000803859	0.000596833	0.28026	1
GO:0044342	type B pancreatic cell proliferation	9	0.000803859	0.000595067	0.280812	1
GO:0001765	membrane raft assembly	6	0.000401929	0.000300181	0.281248	1
GO:0003176	aortic valve development	6	0.000803859	0.00064179	0.281434	1
GO:0001732	formation of cytoplasmic translation initiation complex	16	0.000803859	0.000607201	0.281438	1
GO:0048022	negative regulation of melanin biosynthetic process	5	0.000401929	0.000301228	0.281561	1
GO:0042157	lipoprotein metabolic process	25	0.00120579	0.000945781	0.28175	1
GO:0001514	selenocysteine incorporation	8	0.000803859	0.000627217	0.282434	1
GO:0010897	negative regulation of triglyceride catabolic process	5	0.000401929	0.000303523	0.282543	1
GO:0072162	metanephric mesenchymal cell differentiation	5	0.000401929	0.000298551	0.282572	1
GO:0036089	cleavage furrow formation	7	0.000803859	0.000615866	0.282587	1
GO:0099505	regulation of presynaptic membrane potential	5	0.000803859	0.000617532	0.282641	1
GO:0035280	miRNA loading onto RISC involved in gene silencing by miRNA	7	0.00120579	0.000988308	0.283006	1
GO:0032733	positive regulation of interleukin-10 production	38	0.00200965	0.00164731	0.283131	1
GO:0002768	immune response-regulating cell surface receptor signaling pathway	6	0.000401929	0.000302825	0.283508	1
GO:1902389	ceramide 1-phosphate transport	7	0.000803859	0.000625042	0.284109	1
GO:0001503	ossification	107	0.00763666	0.00695699	0.284434	1
GO:0006883	cellular sodium ion homeostasis	19	0.00160772	0.00133323	0.284502	1
GO:0060485	mesenchyme development	6	0.000803859	0.00062906	0.284609	1
GO:2000678	negative regulation of transcription regulatory region DNA binding	13	0.00120579	0.000952721	0.284622	1
GO:0032516	positive regulation of phosphoprotein phosphatase activity	15	0.00120579	0.000967518	0.284951	1
GO:0016339	calcium-dependent cell-cell adhesion via plasma membrane cell adhesion molecules	42	0.00321543	0.00278558	0.285045	1
GO:0070257	positive regulation of mucus secretion	5	0.000401929	0.000303258	0.28505	1
GO:0030072	peptide hormone secretion	5	0.000401929	0.000305006	0.285271	1
GO:0060760	positive regulation of response to cytokine stimulus	7	0.000401929	0.000299479	0.285628	1
GO:0033148	positive regulation of intracellular estrogen receptor signaling pathway	13	0.00120579	0.000961279	0.285669	1
GO:0035523	protein K29-linked deubiquitination	5	0.000803859	0.000618451	0.285728	1
GO:0060754	positive regulation of mast cell chemotaxis	6	0.000401929	0.000299531	0.285778	1
GO:1903146	regulation of autophagy of mitochondrion	16	0.00120579	0.000963823	0.285899	1
GO:0006337	nucleosome disassembly	18	0.00160772	0.001338	0.285903	1
GO:2000311	regulation of AMPA receptor activity	23	0.00241158	0.00207916	0.285939	1
GO:0050957	equilibrioception	7	0.000401929	0.000307491	0.28597	1
GO:0060762	regulation of branching involved in mammary gland duct morphogenesis	5	0.000401929	0.000300107	0.28631	1
GO:0001553	luteinization	7	0.000803859	0.00062038	0.286426	1
GO:0045806	negative regulation of endocytosis	15	0.00120579	0.000963831	0.286628	1
GO:0043328	protein transport to vacuole involved in ubiquitin-dependent protein catabolic process via the multivesicular body sorting pathway	5	0.000401929	0.000300582	0.28698	1
GO:0003085	negative regulation of systemic arterial blood pressure	15	0.000803859	0.000626016	0.287044	1
GO:0033622	integrin activation	9	0.000803859	0.00061838	0.287213	1
GO:0051984	positive regulation of chromosome segregation	5	0.000401929	0.000299407	0.287253	1
GO:0051103	DNA ligation involved in DNA repair	7	0.000401929	0.000299256	0.287418	1
GO:0072205	metanephric collecting duct development	10	0.000803859	0.000611951	0.287454	1
GO:0048633	positive regulation of skeletal muscle tissue growth	6	0.000803859	0.000628098	0.287624	1
GO:0051702	interaction with symbiont	5	0.000401929	0.000298413	0.28765	1
GO:0033081	regulation of T cell differentiation in thymus	6	0.000803859	0.000640642	0.287775	1
GO:0032388	positive regulation of intracellular transport	6	0.000401929	0.000378027	0.287796	1
GO:0006814	sodium ion transport	132	0.0100482	0.00932118	0.2878	1
GO:0046825	regulation of protein export from nucleus	8	0.000803859	0.000617859	0.287908	1
GO:0050810	regulation of steroid biosynthetic process	10	0.000401929	0.00030276	0.288036	1
GO:0030301	cholesterol transport	24	0.00160772	0.00130308	0.288206	1
GO:0007219	Notch signaling pathway	118	0.00924437	0.00853261	0.288209	1
GO:0042753	positive regulation of circadian rhythm	9	0.00120579	0.000997377	0.288242	1
GO:2000601	positive regulation of Arp2/3 complex-mediated actin nucleation	10	0.00120579	0.000967435	0.288356	1
GO:0007049	cell cycle	657	0.045418	0.0435417	0.288388	1
GO:0045475	locomotor rhythm	12	0.00120579	0.00098612	0.288409	1
GO:0031497	chromatin assembly	8	0.000401929	0.000300607	0.288517	1
GO:1904261	positive regulation of basement membrane assembly involved in embryonic body morphogenesis	5	0.000803859	0.000616338	0.288525	1
GO:0006105	succinate metabolic process	6	0.000401929	0.000303133	0.289076	1
GO:0006600	creatine metabolic process	8	0.000401929	0.00031426	0.289515	1
GO:0045666	positive regulation of neuron differentiation	98	0.00844051	0.00776355	0.289522	1
GO:0010793	regulation of mRNA export from nucleus	6	0.000401929	0.000305965	0.289657	1
GO:0002183	cytoplasmic translational initiation	17	0.000803859	0.000619902	0.289782	1
GO:1904885	beta-catenin destruction complex assembly	5	0.000803859	0.000628347	0.289833	1
GO:0009409	response to cold	39	0.0028135	0.00242681	0.290053	1
GO:0000122	negative regulation of transcription by RNA polymerase II	945	0.0775723	0.0751035	0.290057	1
GO:0030902	hindbrain development	22	0.00200965	0.00168647	0.290098	1
GO:0033327	Leydig cell differentiation	11	0.00120579	0.00095425	0.29011	1
GO:0098885	modification of postsynaptic actin cytoskeleton	5	0.000803859	0.000619614	0.290199	1
GO:0021522	spinal cord motor neuron differentiation	24	0.00200965	0.0016842	0.290217	1
GO:0016043	cellular component organization	10	0.00120579	0.000955044	0.290264	1
GO:0032933	SREBP signaling pathway	9	0.000803859	0.000610775	0.290451	1
GO:2000660	negative regulation of interleukin-1-mediated signaling pathway	7	0.000401929	0.000336593	0.290539	1
GO:0006508	proteolysis	652	0.0309486	0.0295087	0.290589	1
GO:1903800	positive regulation of production of miRNAs involved in gene silencing by miRNA	11	0.00120579	0.000976004	0.290602	1
GO:0034316	negative regulation of Arp2/3 complex-mediated actin nucleation	7	0.000401929	0.000314388	0.290667	1
GO:0060087	relaxation of vascular associated smooth muscle	9	0.000803859	0.000637665	0.290879	1
GO:0001702	gastrulation with mouth forming second	18	0.00241158	0.00210846	0.290969	1
GO:0030198	extracellular matrix organization	257	0.0176849	0.0165519	0.291134	1
GO:0071786	endoplasmic reticulum tubular network organization	11	0.00160772	0.00134855	0.291195	1
GO:1901843	positive regulation of high voltage-gated calcium channel activity	5	0.000803859	0.000634332	0.291257	1
GO:0044255	cellular lipid metabolic process	23	0.00160772	0.00133086	0.291426	1
GO:0050663	cytokine secretion	10	0.000401929	0.000312318	0.291487	1
GO:0008228	opsonization	10	0.000401929	0.000301538	0.291508	1
GO:0051603	proteolysis involved in cellular protein catabolic process	53	0.00200965	0.00167003	0.291873	1
GO:0050881	musculoskeletal movement	6	0.000401929	0.000318291	0.292206	1
GO:0038202	TORC1 signaling	8	0.000803859	0.000624017	0.292248	1
GO:0019882	antigen processing and presentation	48	0.00241158	0.00206873	0.292285	1
GO:0042176	regulation of protein catabolic process	19	0.00120579	0.000962008	0.292458	1
GO:0031054	pre-miRNA processing	14	0.00200965	0.00171103	0.292797	1
GO:0010269	response to selenium ion	11	0.000401929	0.000309282	0.292873	1
GO:2000563	positive regulation of CD4-positive, alpha-beta T cell proliferation	5	0.000401929	0.000319246	0.292979	1
GO:0060744	mammary gland branching involved in thelarche	5	0.000401929	0.000287754	0.293105	1
GO:0010629	negative regulation of gene expression	317	0.0233119	0.0221738	0.293356	1
GO:1990314	cellular response to insulin-like growth factor stimulus	9	0.00120579	0.000991732	0.293579	1
GO:0042752	regulation of circadian rhythm	66	0.00803859	0.00745558	0.29418	1
GO:0061044	negative regulation of vascular wound healing	7	0.000401929	0.000317861	0.294452	1
GO:0010608	posttranscriptional regulation of gene expression	27	0.00321543	0.00285225	0.294516	1
GO:0035696	monocyte extravasation	5	0.000401929	0.000310684	0.294795	1
GO:0014033	neural crest cell differentiation	8	0.00120579	0.000999279	0.294878	1
GO:2001235	positive regulation of apoptotic signaling pathway	31	0.00241158	0.0020677	0.294925	1
GO:0030223	neutrophil differentiation	6	0.000401929	0.000307848	0.295	1
GO:0015693	magnesium ion transport	14	0.00160772	0.00133232	0.295025	1
GO:0046835	carbohydrate phosphorylation	24	0.00120579	0.000960626	0.295529	1
GO:2001259	positive regulation of cation channel activity	8	0.000803859	0.00062474	0.295902	1
GO:0002467	germinal center formation	8	0.000803859	0.000646051	0.296216	1
GO:0072164	mesonephric tubule development	7	0.000803859	0.000623721	0.297088	1
GO:0043462	regulation of ATPase activity	8	0.000401929	0.000330169	0.297104	1
GO:0098761	cellular response to interleukin-7	12	0.000803859	0.000613604	0.297299	1
GO:0043252	sodium-independent organic anion transport	16	0.000803859	0.000622513	0.297574	1
GO:0002181	cytoplasmic translation	42	0.000803859	0.000614411	0.297589	1
GO:0031547	brain-derived neurotrophic factor receptor signaling pathway	5	0.000803859	0.000632609	0.297823	1
GO:0051044	positive regulation of membrane protein ectodomain proteolysis	16	0.00120579	0.000972529	0.297909	1
GO:0034765	regulation of ion transmembrane transport	155	0.011254	0.0104519	0.298026	1
GO:1900242	regulation of synaptic vesicle endocytosis	13	0.00120579	0.000969766	0.29835	1
GO:0016540	protein autoprocessing	24	0.00120579	0.000964253	0.298637	1
GO:0010989	negative regulation of low-density lipoprotein particle clearance	17	0.000401929	0.000310393	0.299028	1
GO:0006903	vesicle targeting	9	0.000803859	0.000624079	0.299062	1
GO:0021650	vestibulocochlear nerve formation	5	0.000401929	0.000312841	0.299489	1
GO:0035999	tetrahydrofolate interconversion	10	0.000401929	0.000314289	0.299717	1
GO:0031146	SCF-dependent proteasomal ubiquitin-dependent protein catabolic process	94	0.00522508	0.00472166	0.299753	1
GO:0034165	positive regulation of toll-like receptor 9 signaling pathway	5	0.000401929	0.000309005	0.300325	1
GO:0001504	neurotransmitter uptake	13	0.00120579	0.00099018	0.300609	1
GO:0030011	maintenance of cell polarity	8	0.000803859	0.000634359	0.300689	1
GO:0051683	establishment of Golgi localization	8	0.000803859	0.000634566	0.300761	1
GO:0035089	establishment of apical/basal cell polarity	5	0.000401929	0.000308409	0.301134	1
GO:0030388	fructose 1,6-bisphosphate metabolic process	9	0.000401929	0.0003124	0.30134	1
GO:0030500	regulation of bone mineralization	23	0.00160772	0.00134048	0.301397	1
GO:0090280	positive regulation of calcium ion import	17	0.00120579	0.000974771	0.30147	1
GO:0042981	regulation of apoptotic process	267	0.0148714	0.0140047	0.301618	1
GO:0061014	positive regulation of mRNA catabolic process	14	0.00160772	0.00137424	0.301631	1
GO:0032731	positive regulation of interleukin-1 beta production	56	0.00241158	0.00204955	0.301803	1
GO:0150105	protein localization to cell-cell junction	8	0.000803859	0.000626661	0.302024	1
GO:0006024	glycosaminoglycan biosynthetic process	38	0.00321543	0.00284522	0.3021	1
GO:0006611	protein export from nucleus	29	0.00241158	0.0020798	0.302183	1
GO:0051482	positive regulation of cytosolic calcium ion concentration involved in phospholipase C-activating G protein-coupled signaling pathway	32	0.00200965	0.0016987	0.303604	1
GO:0001967	suckling behavior	13	0.00160772	0.00135502	0.304649	1
GO:0150011	regulation of neuron projection arborization	6	0.000401929	0.000325363	0.304708	1
GO:0009414	response to water deprivation	8	0.000803859	0.000640722	0.304719	1
GO:0061052	negative regulation of cell growth involved in cardiac muscle cell development	14	0.000803859	0.00063156	0.304916	1
GO:1902895	positive regulation of pri-miRNA transcription by RNA polymerase II	41	0.00442122	0.00400141	0.305427	1
GO:0033173	calcineurin-NFAT signaling cascade	12	0.00160772	0.00138842	0.305881	1
GO:0010669	epithelial structure maintenance	9	0.000803859	0.000641527	0.306898	1
GO:1902462	positive regulation of mesenchymal stem cell proliferation	5	0.000401929	0.000319482	0.306986	1
GO:0060770	negative regulation of epithelial cell proliferation involved in prostate gland development	6	0.000401929	0.000323923	0.307297	1
GO:0045747	positive regulation of Notch signaling pathway	55	0.00482315	0.00436153	0.30738	1
GO:0097320	plasma membrane tubulation	13	0.000803859	0.000629854	0.307882	1
GO:0032025	response to cobalt ion	6	0.000401929	0.000316871	0.307998	1
GO:0014068	positive regulation of phosphatidylinositol 3-kinase signaling	92	0.00763666	0.00704212	0.308151	1
GO:0046621	negative regulation of organ growth	10	0.00120579	0.00098549	0.308401	1
GO:0007165	signal transduction	2097	0.0996785	0.0973006	0.309035	1
GO:0031394	positive regulation of prostaglandin biosynthetic process	7	0.000401929	0.000316124	0.310073	1
GO:0060347	heart trabecula formation	14	0.00120579	0.000991559	0.31009	1
GO:0099149	regulation of postsynaptic neurotransmitter receptor internalization	13	0.00120579	0.00100256	0.310209	1
GO:0032091	negative regulation of protein binding	78	0.00482315	0.00436466	0.310514	1
GO:1905451	positive regulation of Fc-gamma receptor signaling pathway involved in phagocytosis	5	0.000803859	0.000649492	0.31067	1
GO:0033031	positive regulation of neutrophil apoptotic process	5	0.000401929	0.000322292	0.31149	1
GO:0043405	regulation of MAP kinase activity	12	0.000803859	0.000630773	0.311773	1
GO:0051584	regulation of dopamine uptake involved in synaptic transmission	5	0.000401929	0.000325211	0.311826	1
GO:0022405	hair cycle process	6	0.000401929	0.000322522	0.311839	1
GO:0016311	dephosphorylation	183	0.0128617	0.0120661	0.312182	1
GO:0006110	regulation of glycolytic process	43	0.00321543	0.00281469	0.312247	1
GO:0034142	toll-like receptor 4 signaling pathway	17	0.000803859	0.000635547	0.312307	1
GO:0060395	SMAD protein signal transduction	62	0.00482315	0.00436178	0.312557	1
GO:1904825	protein localization to microtubule plus-end	5	0.000401929	0.000323286	0.312796	1
GO:0046653	tetrahydrofolate metabolic process	9	0.000401929	0.000325582	0.312926	1
GO:0006887	exocytosis	123	0.00924437	0.00863511	0.312935	1
GO:0045110	intermediate filament bundle assembly	6	0.000401929	0.000320149	0.313331	1
GO:0043154	negative regulation of cysteine-type endopeptidase activity involved in apoptotic process	75	0.00482315	0.00435344	0.313426	1
GO:0061732	mitochondrial acetyl-CoA biosynthetic process from pyruvate	6	0.000401929	0.000318466	0.313429	1
GO:0070527	platelet aggregation	45	0.0028135	0.00246277	0.313612	1
GO:0048011	neurotrophin TRK receptor signaling pathway	20	0.00200965	0.00173832	0.313688	1
GO:1902017	regulation of cilium assembly	22	0.00120579	0.0009957	0.313828	1
GO:0044281	small molecule metabolic process	9	0.000401929	0.000319567	0.314008	1
GO:0042594	response to starvation	41	0.00241158	0.00210437	0.314048	1
GO:0051294	establishment of spindle orientation	6	0.000401929	0.000314685	0.314112	1
GO:0010766	negative regulation of sodium ion transport	7	0.000803859	0.000663822	0.314323	1
GO:0070365	hepatocyte differentiation	14	0.00120579	0.000997302	0.314334	1
GO:0071028	nuclear mRNA surveillance	9	0.000401929	0.000331369	0.314701	1
GO:0060828	regulation of canonical Wnt signaling pathway	32	0.00361736	0.00325835	0.314748	1
GO:0018057	peptidyl-lysine oxidation	5	0.000401929	0.000336193	0.314805	1
GO:0048515	spermatid differentiation	7	0.000401929	0.000339186	0.314853	1
GO:0044772	mitotic cell cycle phase transition	23	0.00200965	0.00172267	0.315362	1
GO:0071799	cellular response to prostaglandin D stimulus	5	0.000401929	0.000323986	0.31571	1
GO:0032510	endosome to lysosome transport via multivesicular body sorting pathway	5	0.000401929	0.000319388	0.315927	1
GO:0042178	xenobiotic catabolic process	8	0.000401929	0.000332993	0.315946	1
GO:0033299	secretion of lysosomal enzymes	5	0.000401929	0.00032245	0.316007	1
GO:0000027	ribosomal large subunit assembly	25	0.000401929	0.000325906	0.316234	1
GO:0043297	apical junction assembly	8	0.000803859	0.000637311	0.316299	1
GO:0030168	platelet activation	108	0.00803859	0.00743303	0.316848	1
GO:0071353	cellular response to interleukin-4	25	0.00120579	0.000988532	0.316852	1
GO:0098883	synapse pruning	8	0.000401929	0.000349172	0.31749	1
GO:0030194	positive regulation of blood coagulation	15	0.000803859	0.000631102	0.317506	1
GO:0030330	DNA damage response, signal transduction by p53 class mediator	16	0.00160772	0.00138731	0.317618	1
GO:1902747	negative regulation of lens fiber cell differentiation	6	0.000803859	0.000663078	0.31766	1
GO:2000641	regulation of early endosome to late endosome transport	8	0.000803859	0.000641468	0.317752	1
GO:1900222	negative regulation of amyloid-beta clearance	11	0.000803859	0.00063808	0.317912	1
GO:0045807	positive regulation of endocytosis	22	0.00200965	0.00174606	0.318577	1
GO:0035725	sodium ion transmembrane transport	107	0.00844051	0.00787544	0.318919	1
GO:0006020	inositol metabolic process	7	0.000803859	0.000674791	0.31899	1
GO:0061418	regulation of transcription from RNA polymerase II promoter in response to hypoxia	72	0.00401929	0.00362563	0.319039	1
GO:0021756	striatum development	14	0.00120579	0.00101571	0.319069	1
GO:0010800	positive regulation of peptidyl-threonine phosphorylation	29	0.00241158	0.00211961	0.319357	1
GO:1900113	negative regulation of histone H3-K9 trimethylation	6	0.000401929	0.000326606	0.319456	1
GO:0001696	gastric acid secretion	8	0.000401929	0.000323787	0.319622	1
GO:0050927	positive regulation of positive chemotaxis	12	0.00120579	0.000990486	0.319697	1
GO:0006554	lysine catabolic process	12	0.000803859	0.000643592	0.320247	1
GO:1902600	proton transmembrane transport	117	0.00522508	0.0047685	0.320252	1
GO:0071549	cellular response to dexamethasone stimulus	32	0.0028135	0.0025022	0.320947	1
GO:0048566	embryonic digestive tract development	18	0.00160772	0.00136202	0.321005	1
GO:0050890	cognition	51	0.00361736	0.00324294	0.321118	1
GO:0051497	negative regulation of stress fiber assembly	32	0.00321543	0.00288253	0.321542	1
GO:0071312	cellular response to alkaloid	9	0.000401929	0.00032878	0.321837	1
GO:0021702	cerebellar Purkinje cell differentiation	15	0.00120579	0.00103454	0.322374	1
GO:0051899	membrane depolarization	22	0.00160772	0.00137602	0.322466	1
GO:0035646	endosome to melanosome transport	10	0.000803859	0.000643035	0.322514	1
GO:0048814	regulation of dendrite morphogenesis	23	0.00241158	0.00214147	0.322742	1
GO:0000389	mRNA 3'-splice site recognition	6	0.000401929	0.000299712	0.323158	1
GO:0051560	mitochondrial calcium ion homeostasis	16	0.00120579	0.00100395	0.323567	1
GO:0070593	dendrite self-avoidance	17	0.00120579	0.00101293	0.324901	1
GO:1990918	double-strand break repair involved in meiotic recombination	7	0.000401929	0.000327313	0.32501	1
GO:0071286	cellular response to magnesium ion	7	0.000803859	0.000657072	0.325136	1
GO:1904263	positive regulation of TORC1 signaling	17	0.00120579	0.00100478	0.325204	1
GO:1903715	regulation of aerobic respiration	9	0.000803859	0.000653759	0.325445	1
GO:0070885	negative regulation of calcineurin-NFAT signaling cascade	18	0.00120579	0.00101689	0.325701	1
GO:0098957	anterograde axonal transport of mitochondrion	5	0.000401929	0.000330691	0.32587	1
GO:0060711	labyrinthine layer development	9	0.000803859	0.00065079	0.326024	1
GO:1990961	xenobiotic detoxification by transmembrane export across the plasma membrane	8	0.000401929	0.000334032	0.326222	1
GO:1902237	positive regulation of endoplasmic reticulum stress-induced intrinsic apoptotic signaling pathway	11	0.00120579	0.00102231	0.32625	1
GO:0035264	multicellular organism growth	89	0.00803859	0.00751793	0.32673	1
GO:0035735	intraciliary transport involved in cilium assembly	40	0.00241158	0.00211592	0.327029	1
GO:0048845	venous blood vessel morphogenesis	7	0.000803859	0.000659088	0.327274	1
GO:0019233	sensory perception of pain	59	0.00442122	0.00405163	0.327411	1
GO:0045088	regulation of innate immune response	22	0.00160772	0.00137069	0.327671	1
GO:1900181	negative regulation of protein localization to nucleus	21	0.00200965	0.00176448	0.327696	1
GO:0016064	immunoglobulin mediated immune response	14	0.000401929	0.000331226	0.327746	1
GO:0050861	positive regulation of B cell receptor signaling pathway	10	0.000803859	0.000657378	0.327839	1
GO:0002674	negative regulation of acute inflammatory response	8	0.000401929	0.000338097	0.327896	1
GO:0060052	neurofilament cytoskeleton organization	8	0.000803859	0.00064964	0.328105	1
GO:2000785	regulation of autophagosome assembly	14	0.00120579	0.00101494	0.328193	1
GO:0034097	response to cytokine	57	0.00401929	0.00364875	0.328349	1
GO:1901214	regulation of neuron death	21	0.00160772	0.00138631	0.328675	1
GO:0010649	regulation of cell communication by electrical coupling	8	0.00120579	0.00103418	0.329043	1
GO:1902751	positive regulation of cell cycle G2/M phase transition	6	0.000401929	0.000331573	0.329066	1
GO:0003407	neural retina development	16	0.00160772	0.00139566	0.329155	1
GO:0043627	response to estrogen	64	0.00401929	0.00364636	0.329523	1
GO:0008152	metabolic process	191	0.00924437	0.00864471	0.329644	1
GO:1990535	neuron projection maintenance	10	0.000803859	0.000654588	0.32979	1
GO:0046320	regulation of fatty acid oxidation	5	0.000401929	0.000332361	0.329993	1
GO:0006783	heme biosynthetic process	23	0.00120579	0.0010003	0.330298	1
GO:0007356	thorax and anterior abdomen determination	5	0.000401929	0.000336442	0.330415	1
GO:0002063	chondrocyte development	20	0.00241158	0.00213976	0.330642	1
GO:0051592	response to calcium ion	62	0.00482315	0.00441424	0.330942	1
GO:0098703	calcium ion import across plasma membrane	16	0.00160772	0.00140739	0.331133	1
GO:0046822	regulation of nucleocytoplasmic transport	6	0.000401929	0.000334622	0.331337	1
GO:0034968	histone lysine methylation	23	0.00160772	0.0013776	0.331774	1
GO:1990000	amyloid fibril formation	12	0.000803859	0.000639218	0.332249	1
GO:0086009	membrane repolarization	11	0.000803859	0.000662779	0.332339	1
GO:0006869	lipid transport	140	0.00803859	0.00751066	0.332418	1
GO:0043409	negative regulation of MAPK cascade	29	0.00200965	0.0017858	0.332886	1
GO:0043534	blood vessel endothelial cell migration	11	0.000803859	0.0006546	0.333198	1
GO:2000344	positive regulation of acrosome reaction	12	0.000401929	0.000363229	0.33358	1
GO:0022614	membrane to membrane docking	5	0.000401929	0.000337461	0.333717	1
GO:1903432	regulation of TORC1 signaling	7	0.000401929	0.000343224	0.334139	1
GO:0016048	detection of temperature stimulus	5	0.000401929	0.00033849	0.334266	1
GO:0060022	hard palate development	9	0.00120579	0.00103009	0.334292	1
GO:0003334	keratinocyte development	9	0.000803859	0.000669817	0.334921	1
GO:0002756	MyD88-independent toll-like receptor signaling pathway	20	0.00120579	0.00102133	0.3351	1
GO:0010961	cellular magnesium ion homeostasis	5	0.000401929	0.000336076	0.335135	1
GO:0090103	cochlea morphogenesis	24	0.00200965	0.00176031	0.335418	1
GO:0009247	glycolipid biosynthetic process	10	0.000401929	0.000347542	0.335456	1
GO:0048793	pronephros development	6	0.000401929	0.000340559	0.335607	1
GO:1904183	negative regulation of pyruvate dehydrogenase activity	5	0.000401929	0.00034073	0.335782	1
GO:0042297	vocal learning	6	0.000803859	0.000675392	0.335813	1
GO:0070528	protein kinase C signaling	14	0.000401929	0.000341522	0.336	1
GO:0010506	regulation of autophagy	76	0.00562701	0.00520493	0.336084	1
GO:0042102	positive regulation of T cell proliferation	66	0.00321543	0.00286238	0.336187	1
GO:0006325	chromatin organization	368	0.0297428	0.0286699	0.336202	1
GO:2000145	regulation of cell motility	31	0.00321543	0.00292691	0.336233	1
GO:0015698	inorganic anion transport	27	0.00200965	0.00177803	0.336283	1
GO:0032695	negative regulation of interleukin-12 production	18	0.000803859	0.000654814	0.336578	1
GO:0009992	cellular water homeostasis	8	0.000401929	0.000347489	0.336759	1
GO:0050729	positive regulation of inflammatory response	94	0.00482315	0.00442152	0.33678	1
GO:1904354	negative regulation of telomere capping	5	0.000401929	0.000338251	0.337103	1
GO:0010917	negative regulation of mitochondrial membrane potential	14	0.000803859	0.000659785	0.337564	1
GO:0072583	clathrin-dependent endocytosis	24	0.00241158	0.00216954	0.337792	1
GO:0051900	regulation of mitochondrial depolarization	5	0.000401929	0.00033017	0.338227	1
GO:0008156	negative regulation of DNA replication	17	0.000803859	0.00068598	0.338869	1
GO:0016082	synaptic vesicle priming	16	0.00160772	0.00139407	0.338941	1
GO:0044539	long-chain fatty acid import into cell	8	0.000803859	0.00067346	0.339182	1
GO:0043552	positive regulation of phosphatidylinositol 3-kinase activity	32	0.0028135	0.00253396	0.339965	1
GO:0120041	positive regulation of macrophage proliferation	7	0.000401929	0.000356225	0.339972	1
GO:0044806	G-quadruplex DNA unwinding	7	0.000401929	0.000338331	0.340009	1
GO:0039702	viral budding via host ESCRT complex	20	0.00120579	0.00102285	0.340141	1
GO:0050863	regulation of T cell activation	12	0.000803859	0.00070343	0.340644	1
GO:0048557	embryonic digestive tract morphogenesis	17	0.00160772	0.00139005	0.341011	1
GO:0097428	protein maturation by iron-sulfur cluster transfer	12	0.000401929	0.000351441	0.341025	1
GO:0036444	calcium import into the mitochondrion	11	0.000803859	0.000660545	0.341089	1
GO:0048546	digestive tract morphogenesis	16	0.00120579	0.0010233	0.341106	1
GO:0071773	cellular response to BMP stimulus	38	0.00361736	0.00329864	0.341115	1
GO:0035767	endothelial cell chemotaxis	9	0.000803859	0.000670086	0.341323	1
GO:0090200	positive regulation of release of cytochrome c from mitochondria	28	0.00160772	0.00139053	0.341886	1
GO:0006782	protoporphyrinogen IX biosynthetic process	10	0.000401929	0.000348659	0.342025	1
GO:0050767	regulation of neurogenesis	42	0.00321543	0.0028841	0.34238	1
GO:0098976	excitatory chemical synaptic transmission	9	0.000803859	0.000676294	0.342511	1
GO:0045814	negative regulation of gene expression, epigenetic	55	0.00321543	0.00290642	0.34278	1
GO:1901537	positive regulation of DNA demethylation	5	0.000803859	0.000677573	0.34281	1
GO:0140059	dendrite arborization	5	0.000401929	0.000342041	0.343107	1
GO:0007631	feeding behavior	36	0.00200965	0.00178312	0.343406	1
GO:0007198	adenylate cyclase-inhibiting serotonin receptor signaling pathway	7	0.000401929	0.000344892	0.343552	1
GO:0033314	mitotic DNA replication checkpoint	10	0.000401929	0.000337652	0.344074	1
GO:0140374	antiviral innate immune response	9	0.000401929	0.000348513	0.344226	1
GO:1900015	regulation of cytokine production involved in inflammatory response	10	0.000401929	0.000347767	0.344265	1
GO:0015872	dopamine transport	6	0.000401929	0.000347348	0.344577	1
GO:0030517	negative regulation of axon extension	23	0.00200965	0.00180071	0.344589	1
GO:0090399	replicative senescence	16	0.000803859	0.000667988	0.344761	1
GO:0007163	establishment or maintenance of cell polarity	50	0.00361736	0.00328488	0.34478	1
GO:0001955	blood vessel maturation	8	0.000803859	0.000675878	0.344848	1
GO:0071494	cellular response to UV-C	7	0.000401929	0.000335459	0.344945	1
GO:0045022	early endosome to late endosome transport	21	0.00200965	0.00178809	0.345032	1
GO:0051694	pointed-end actin filament capping	7	0.000401929	0.00035382	0.345155	1
GO:0034453	microtubule anchoring	15	0.00160772	0.00141793	0.345168	1
GO:0034695	response to prostaglandin E	8	0.000401929	0.000350319	0.34584	1
GO:0031960	response to corticosteroid	7	0.000401929	0.000340345	0.34601	1
GO:0032651	regulation of interleukin-1 beta production	8	0.000401929	0.000350444	0.346043	1
GO:0032268	regulation of cellular protein metabolic process	5	0.000401929	0.00034298	0.346059	1
GO:0061051	positive regulation of cell growth involved in cardiac muscle cell development	13	0.000803859	0.000675958	0.346167	1
GO:0048545	response to steroid hormone	32	0.00200965	0.00176535	0.346325	1
GO:2000648	positive regulation of stem cell proliferation	12	0.00120579	0.00104012	0.346396	1
GO:0002218	activation of innate immune response	26	0.00160772	0.00139556	0.346408	1
GO:0045948	positive regulation of translational initiation	22	0.00241158	0.00214787	0.346487	1
GO:0000289	nuclear-transcribed mRNA poly(A) tail shortening	22	0.00241158	0.00218162	0.346676	1
GO:0031584	activation of phospholipase D activity	6	0.000401929	0.000345588	0.347125	1
GO:0043567	regulation of insulin-like growth factor receptor signaling pathway	9	0.000401929	0.00035013	0.347469	1
GO:0060038	cardiac muscle cell proliferation	14	0.00160772	0.00142646	0.347537	1
GO:0006626	protein targeting to mitochondrion	31	0.00120579	0.00103048	0.347806	1
GO:0002675	positive regulation of acute inflammatory response	14	0.000803859	0.000664155	0.347897	1
GO:0060389	pathway-restricted SMAD protein phosphorylation	13	0.00160772	0.0014065	0.348151	1
GO:0000050	urea cycle	12	0.000401929	0.000350307	0.348204	1
GO:0097202	activation of cysteine-type endopeptidase activity	15	0.000803859	0.00068614	0.348749	1
GO:1990830	cellular response to leukemia inhibitory factor	99	0.00884244	0.00833006	0.348772	1
GO:0001818	negative regulation of cytokine production	18	0.00120579	0.00103112	0.348872	1
GO:0006768	biotin metabolic process	9	0.000401929	0.000350521	0.349047	1
GO:0086014	atrial cardiac muscle cell action potential	9	0.000803859	0.000676411	0.349116	1
GO:0010906	regulation of glucose metabolic process	25	0.00200965	0.00180568	0.349154	1
GO:0032525	somite rostral/caudal axis specification	11	0.000803859	0.000677669	0.349665	1
GO:0050772	positive regulation of axonogenesis	37	0.00401929	0.00371984	0.349727	1
GO:1904953	Wnt signaling pathway involved in midbrain dopaminergic neuron differentiation	6	0.000803859	0.000675426	0.349818	1
GO:0006264	mitochondrial DNA replication	9	0.000401929	0.000351134	0.349874	1
GO:0071407	cellular response to organic cyclic compound	72	0.00602894	0.00563263	0.349967	1
GO:0048009	insulin-like growth factor receptor signaling pathway	14	0.00200965	0.00180606	0.350036	1
GO:1990743	protein sialylation	5	0.000401929	0.000353496	0.350667	1
GO:0030432	peristalsis	10	0.000803859	0.00067583	0.350808	1
GO:0070508	cholesterol import	6	0.000401929	0.000345727	0.350925	1
GO:0140206	dipeptide import across plasma membrane	5	0.000401929	0.000371765	0.351015	1
GO:0009651	response to salt stress	10	0.000401929	0.000356216	0.35104	1
GO:0051150	regulation of smooth muscle cell differentiation	5	0.000803859	0.000685087	0.351146	1
GO:0001561	fatty acid alpha-oxidation	9	0.000401929	0.000351763	0.351248	1
GO:0048286	lung alveolus development	39	0.00401929	0.00370714	0.351422	1
GO:0048511	rhythmic process	148	0.0152733	0.0146278	0.351632	1
GO:0002237	response to molecule of bacterial origin	11	0.000401929	0.00035662	0.351657	1
GO:0044257	cellular protein catabolic process	18	0.00120579	0.00104833	0.352089	1
GO:0055118	negative regulation of cardiac muscle contraction	5	0.000401929	0.000350309	0.352411	1
GO:0048705	skeletal system morphogenesis	45	0.00442122	0.00410711	0.352575	1
GO:0070417	cellular response to cold	11	0.000803859	0.000680659	0.352643	1
GO:0006699	bile acid biosynthetic process	29	0.00160772	0.00141205	0.353446	1
GO:0050821	protein stabilization	191	0.0136656	0.0130822	0.354089	1
GO:0043161	proteasome-mediated ubiquitin-dependent protein catabolic process	193	0.0152733	0.0146563	0.354259	1
GO:0051792	medium-chain fatty acid biosynthetic process	6	0.000401929	0.000355417	0.354284	1
GO:0006013	mannose metabolic process	9	0.000401929	0.000361313	0.354386	1
GO:0043162	ubiquitin-dependent protein catabolic process via the multivesicular body sorting pathway	19	0.00120579	0.00104069	0.354475	1
GO:0006911	phagocytosis, engulfment	103	0.00160772	0.0014163	0.354711	1
GO:0014823	response to activity	51	0.00361736	0.00332853	0.354898	1
GO:0006826	iron ion transport	22	0.00160772	0.00141881	0.3549	1
GO:0000278	mitotic cell cycle	154	0.00884244	0.00834493	0.355043	1
GO:0010463	mesenchymal cell proliferation	5	0.000401929	0.000352221	0.355084	1
GO:1990126	retrograde transport, endosome to plasma membrane	18	0.00120579	0.00104712	0.355106	1
GO:0021854	hypothalamus development	14	0.000803859	0.000675041	0.355161	1
GO:0034356	"NAD biosynthesis via nicotinamide riboside salvage pathway"	14	0.000803859	0.000673582	0.355309	1
GO:0060412	ventricular septum morphogenesis	37	0.00442122	0.00409959	0.35549	1
GO:0008277	regulation of G protein-coupled receptor signaling pathway	46	0.00321543	0.00292154	0.355572	1
GO:0072321	chaperone-mediated protein transport	9	0.000401929	0.000358834	0.355739	1
GO:0060028	convergent extension involved in axis elongation	5	0.000401929	0.000352838	0.355855	1
GO:0006650	glycerophospholipid metabolic process	9	0.000401929	0.00035962	0.356817	1
GO:0035745	T-helper 2 cell cytokine production	5	0.000401929	0.000406095	0.356924	1
GO:0045600	positive regulation of fat cell differentiation	55	0.00442122	0.00408822	0.357573	1
GO:0055119	relaxation of cardiac muscle	14	0.00160772	0.0014282	0.357708	1
GO:0033211	adiponectin-activated signaling pathway	7	0.000803859	0.000681621	0.357776	1
GO:0009620	response to fungus	6	0.000401929	0.000344197	0.35781	1
GO:0009048	dosage compensation by inactivation of X chromosome	11	0.000803859	0.000685364	0.357946	1
GO:0071281	cellular response to iron ion	7	0.000401929	0.000357618	0.35797	1
GO:0060766	negative regulation of androgen receptor signaling pathway	15	0.00160772	0.00143808	0.358108	1
GO:0021637	trigeminal nerve structural organization	5	0.000803859	0.00069627	0.358132	1
GO:0032927	positive regulation of activin receptor signaling pathway	7	0.000803859	0.000697016	0.358532	1
GO:0051865	protein autoubiquitination	71	0.00562701	0.00526988	0.358636	1
GO:0048745	smooth muscle tissue development	15	0.00160772	0.00143048	0.359131	1
GO:0035329	hippo signaling	27	0.00321543	0.00296491	0.359289	1
[truncated: 3,322 more rows]
